# Supplementary material for: Chemical Synthesis and Structure-Activity Relationship Study Yield Desotamide a Analogues with Improved Antibacterial Activity
Source: MDPI journal article supplement (doi:10.3390/md19060303), 2021-05-24

# Chemical Synthesis and Structure-Activity Relationship Study Yield Desotamide A Analogues with Improved Antibacterial Activity

Run xu <sup>1,3,‡</sup>, Yongxiang Song <sup>1,‡</sup>, Jun Li <sup>1</sup>, Jianhua Ju <sup>1,2</sup>, and Qinglian Li <sup>1,\*</sup>

<sup>1</sup> CAS Key Laboratory of Tropical Marine Bio-resources and Ecology, Guangdong Key Laboratory of Marine Material Medica, RNAM Center for Marine Microbiology, South China Sea Institute of Oceanology, Chinese Academy of Sciences, 164 West Xingang Rd., Guangzhou 510301, China; runxu126@126.com (R.X.); songx@scsio.ac.cn (Y.S.); lijun@scsio.ac.cn (J.L.); jjju@scsio.ac.cn (J.J.)

<sup>2</sup> College of Oceanology, University of Chinese Academy of Sciences, 19 Yuquan Road, Beijing 100049, China

<sup>3</sup> School of Pharmacy, Zunyi Medical University, 201 Dalian Road, Zunyi 563000, China

\* Correspondence: liql@scsio.ac.cn; Tel./Fax: +86-20-3406-6449

‡ These authors contributed equally to this work.

| Table of contents                                                                 | Page    |
|-----------------------------------------------------------------------------------|---------|
| Figures S1-S3. HRESIMS, and 1D NMR spectra in DMSO- <i>d</i> <sub>6</sub> of 7    | S2-S4   |
| Figures S4-S6. HRESIMS, and 1D NMR spectra in DMSO- <i>d</i> <sub>6</sub> of 8    | S5-S7   |
| Figures S7-S9. HRESIMS, and 1D NMR spectra in DMSO- <i>d</i> <sub>6</sub> of 9    | S8-S10  |
| Figures S10-S12. HRESIMS, and 1D NMR spectra in DMSO- <i>d</i> <sub>6</sub> of 10 | S11-S13 |
| Figures S13-S15. HRESIMS, and 1D NMR spectra in DMSO- <i>d</i> <sub>6</sub> of 11 | S14-S16 |
| Figures S16-S18. HRESIMS, and 1D NMR spectra in DMSO- <i>d</i> <sub>6</sub> of 12 | S17-S19 |
| Figures S19-S21. HRESIMS, and 1D NMR spectra in DMSO- <i>d</i> <sub>6</sub> of 13 | S20-S22 |
| Figures S22-S24. HRESIMS, and 1D NMR spectra in DMSO- <i>d</i> <sub>6</sub> of 14 | S23-S25 |
| Figures S25-S27. HRESIMS, and 1D NMR spectra in DMSO- <i>d</i> <sub>6</sub> of 15 | S26-S28 |
| Figures S28-S30. HRESIMS, and 1D NMR spectra in DMSO- <i>d</i> <sub>6</sub> of 16 | S29-S31 |
| Figures S31-S33. HRESIMS, and 1D NMR spectra in DMSO- <i>d</i> <sub>6</sub> of 17 | S32-S34 |
| Figures S34-S36. HRESIMS, and 1D NMR spectra in DMSO- <i>d</i> <sub>6</sub> of 18 | S35-S37 |
| Figures S7-S39. HRESIMS, and 1D NMR spectra in DMSO- <i>d</i> <sub>6</sub> of 19  | S38-S40 |

Figures S1. The HRESIMS spectrum of 7

## Mass Spectrum SmartFormula Report

### Analysis Info

Analysis Name D:\Data\MS\data\202102\liqinglian\_B\_pos\_46\_01\_10003.d  
 Method LC\_Direct Infusion\_pos\_100-1000mz.m  
 Sample Name liqinglian\_B\_pos  
 Comment

Acquisition Date 2/8/2021 3:17:21 PM  
 Operator SCSIO  
 Instrument maXis 255552.00029

### Acquisition Parameter

|             |          |                      |          |                  |           |
|-------------|----------|----------------------|----------|------------------|-----------|
| Source Type | ESI      | Ion Polarity         | Positive | Set Nebulizer    | 0.4 Bar   |
| Focus       | Active   | Set Capillary        | 4500 V   | Set Dry Heater   | 180 °C    |
| Scan Begin  | 100 m/z  | Set End Plate Offset | -500 V   | Set Dry Gas      | 4.0 l/min |
| Scan End    | 2000 m/z | Set Charging Voltage | 0 V      | Set Divert Valve | Waste     |
|             |          | Set Corona           | 0 nA     | Set APCI Heater  | 0 °C      |

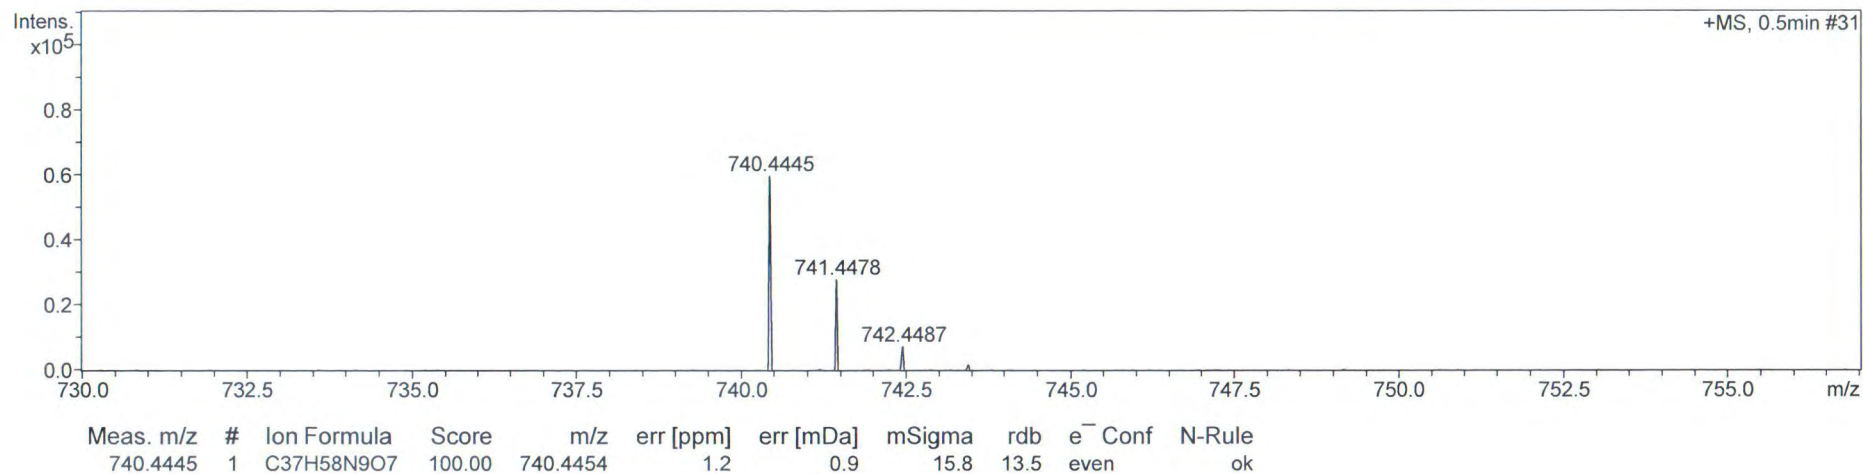

Figures S2. The  $^1\text{H}$  NMR spectrum of **7** in  $\text{DMSO-}d_6$

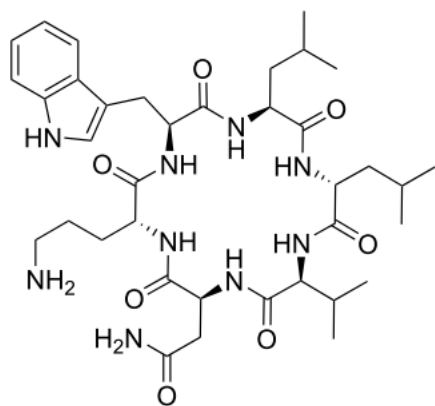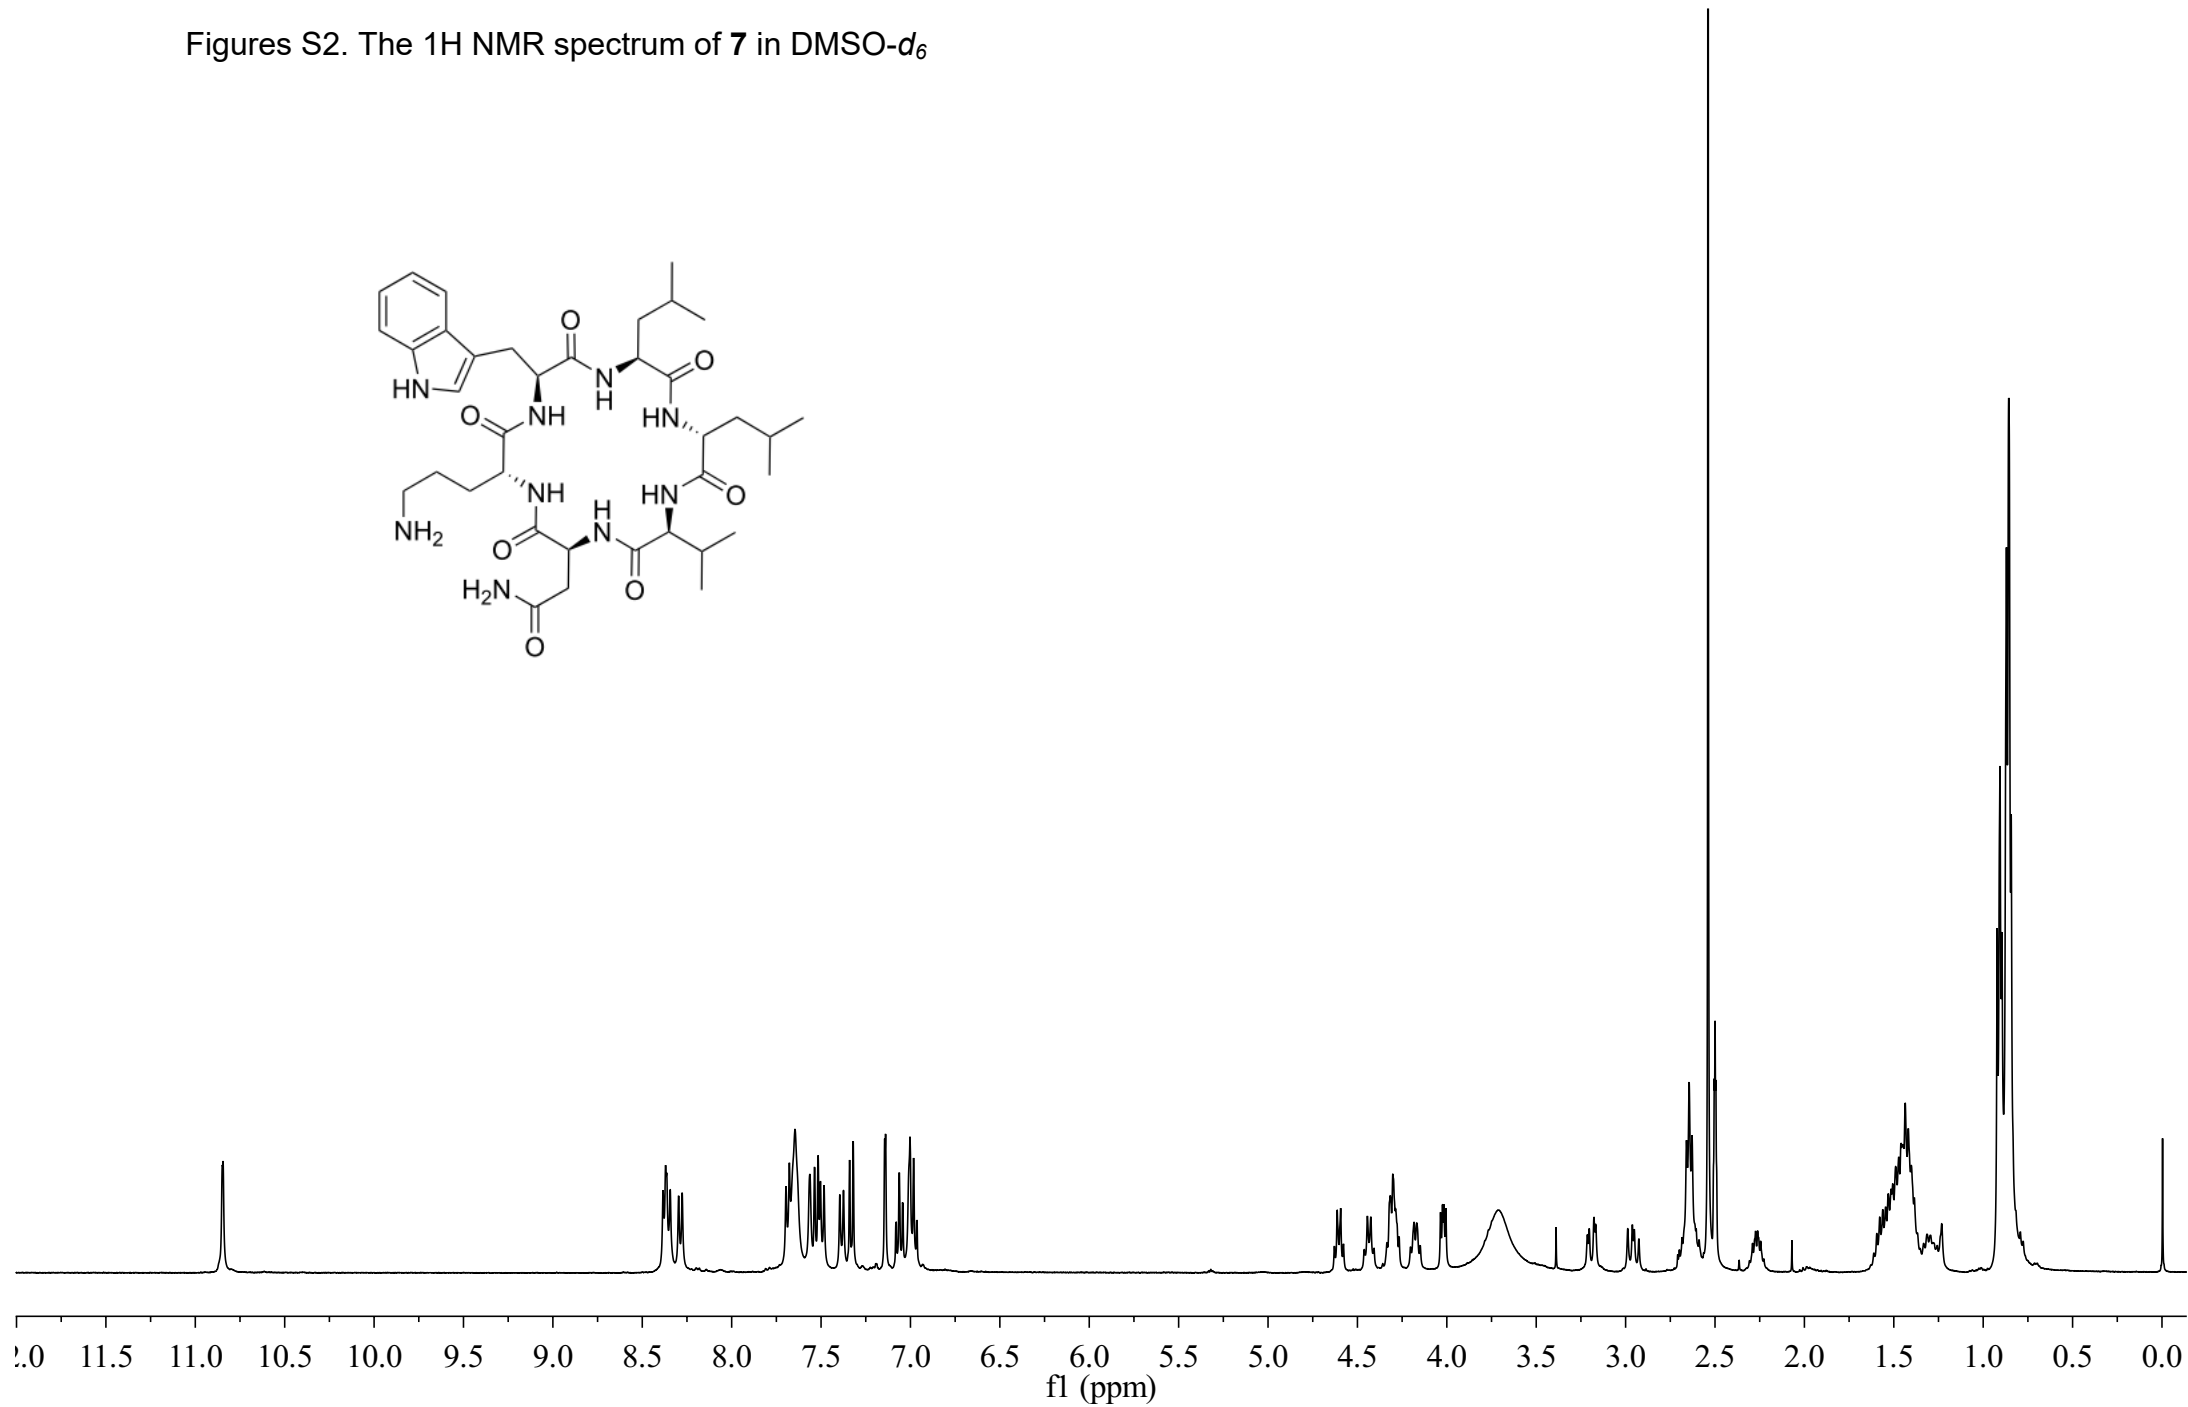

CC(C)C[C@@H](C(=O)N[C@@H](C(=O)N[C@@H](Cc1c[nH]c2ccccc12)C[C@@H](C(=O)NCCCN)C(=O)N[C@@H](C(=O)NCCCN)C(=O)N[C@@H](C(=O)NCCCN)C(=O)N)C(=O)N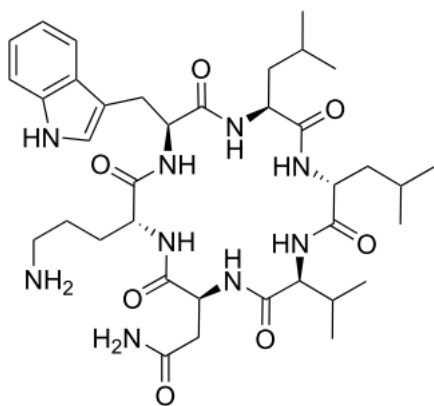

Figures S4. The HRESIMS spectrum of **8**

## Mass Spectrum SmartFormula Report

### Analysis Info

Analysis Name D:\Data\MS\data\202102\liqinglian\_B1\_pos\_47\_01\_10004.d  
 Method LC\_Direct Infusion\_pos\_100-1000mz.m  
 Sample Name liqinglian\_B1\_pos  
 Comment

Acquisition Date 2/8/2021 3:20:48 PM  
 Operator SCSIO  
 Instrument maXis 255552.00029

### Acquisition Parameter

|             |          |                      |          |                  |           |
|-------------|----------|----------------------|----------|------------------|-----------|
| Source Type | ESI      | Ion Polarity         | Positive | Set Nebulizer    | 0.4 Bar   |
| Focus       | Active   | Set Capillary        | 4500 V   | Set Dry Heater   | 180 °C    |
| Scan Begin  | 100 m/z  | Set End Plate Offset | -500 V   | Set Dry Gas      | 4.0 l/min |
| Scan End    | 2000 m/z | Set Charging Voltage | 0 V      | Set Divert Valve | Waste     |
|             |          | Set Corona           | 0 nA     | Set APCI Heater  | 0 °C      |

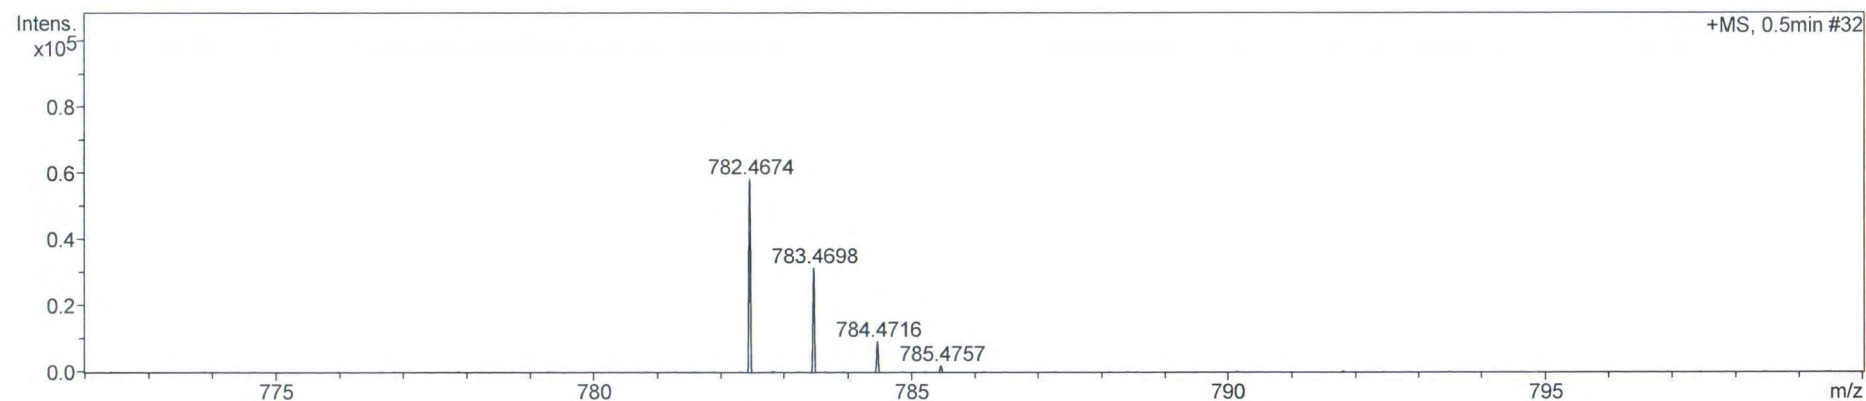

| Meas. m/z | # | Ion Formula | Score  | m/z      | err [ppm] | err [mDa] | mSigma | rdb  | e <sup>-</sup> Conf | N-Rule |
|-----------|---|-------------|--------|----------|-----------|-----------|--------|------|---------------------|--------|
| 782.4674  | 1 | C38H60N11O7 | 100.00 | 782.4672 | -0.3      | -0.2      | 45.4   | 14.5 | even                | ok     |

Figures S5. The  $^1\text{H}$  NMR spectrum of **8** in  $\text{DMSO-}d_6$

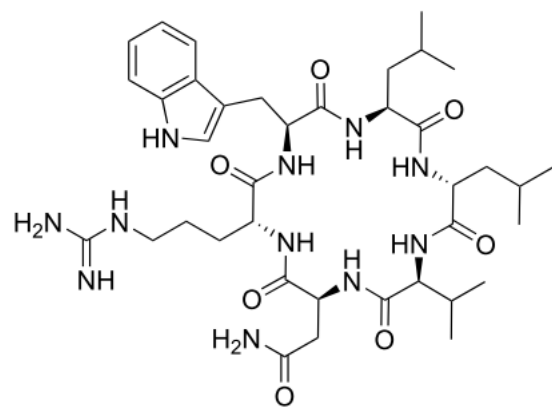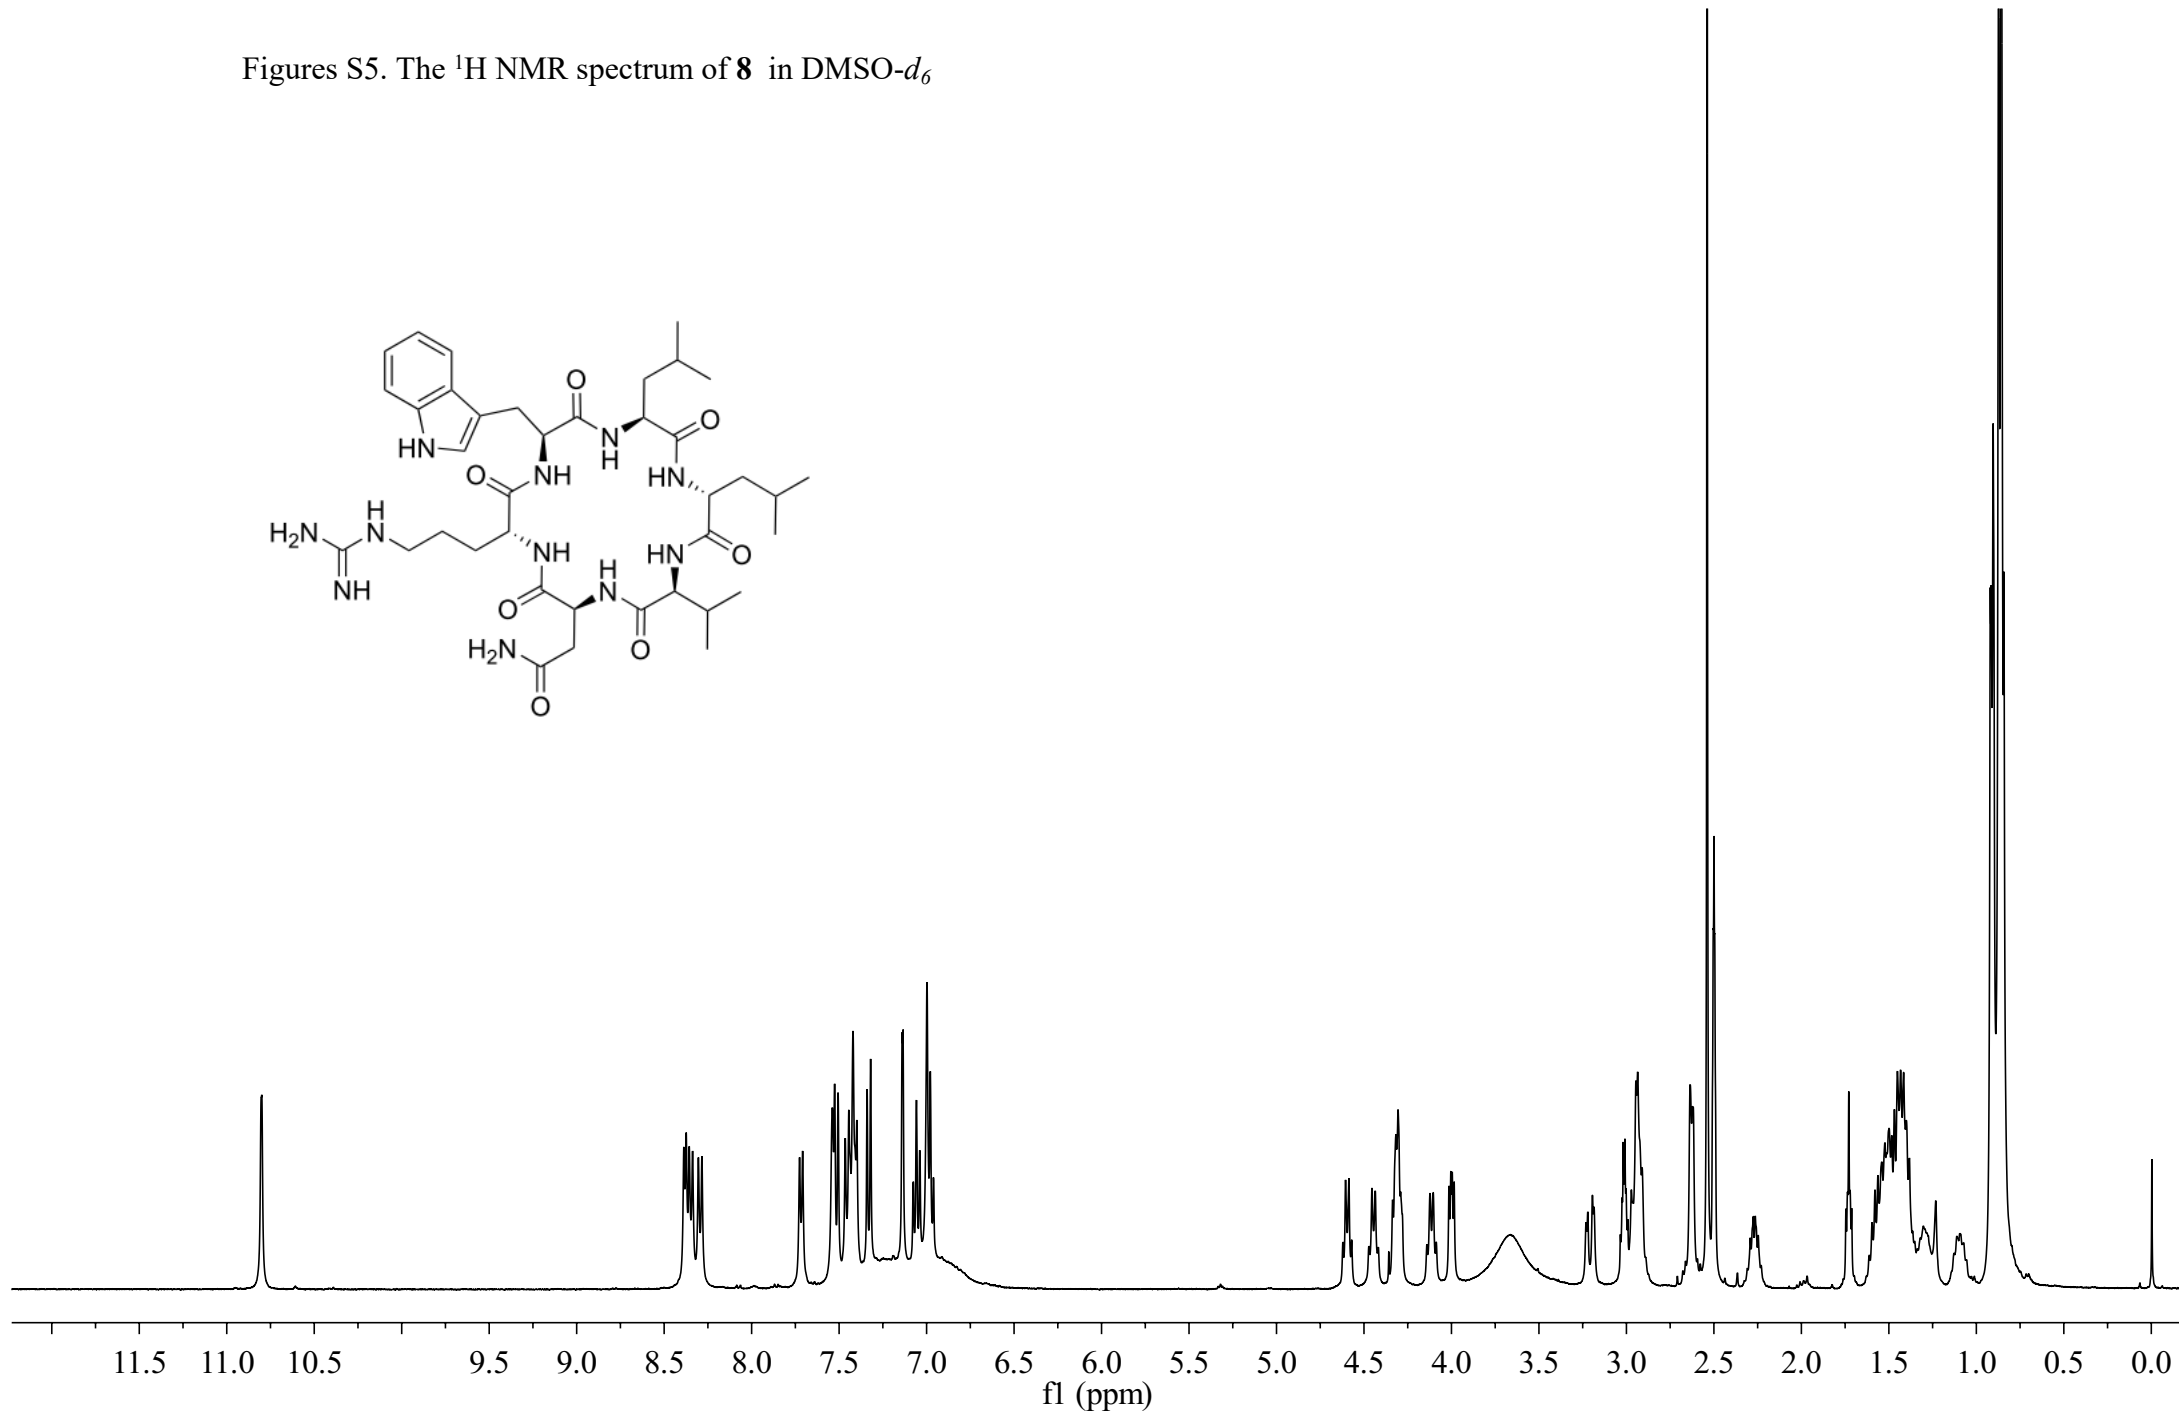

Figures S6. The  $^{13}\text{C}$  NMR spectrum of **8** in  $\text{DMSO-}d_6$

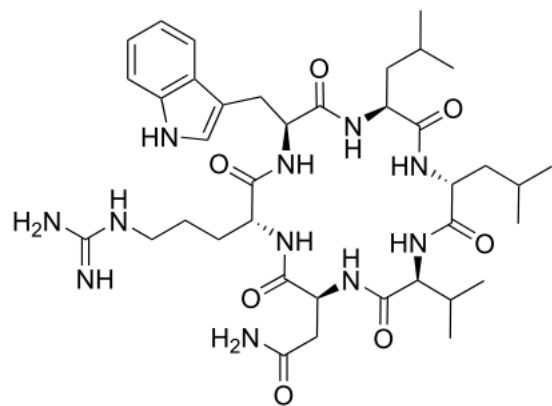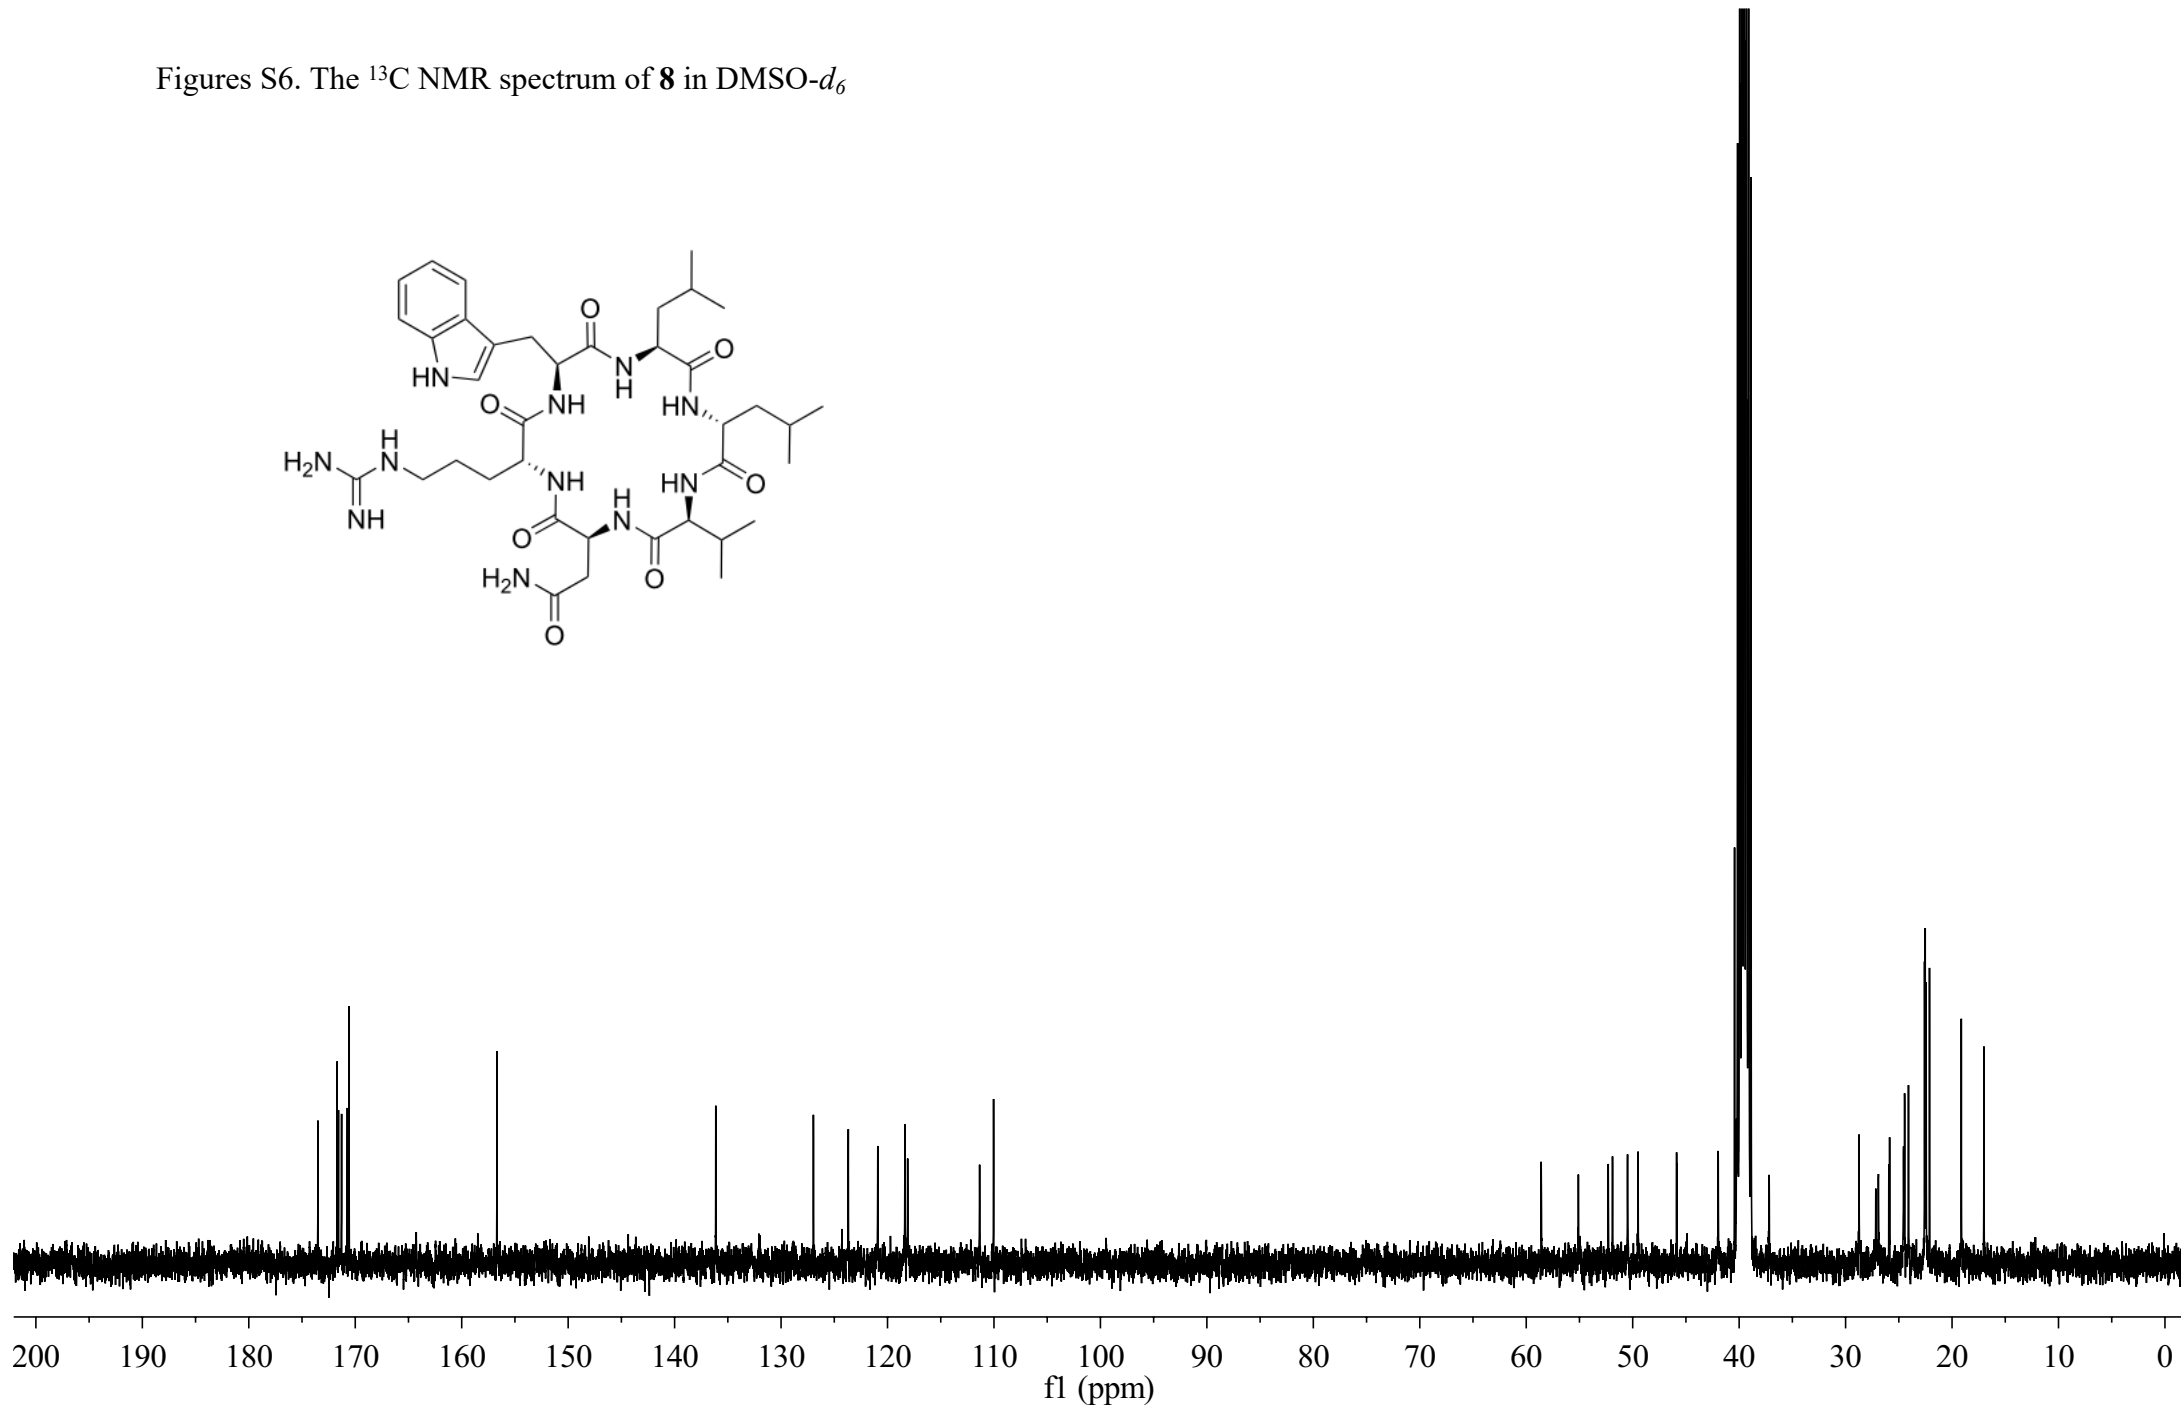

Figures S7. The HRESIMS spectrum of **9**

## Mass Spectrum SmartFormula Report

### Analysis Info

Analysis Name D:\Data\MS\data\202102\liqinglian\_B2\_pos\_48\_01\_10005.d  
 Method LC\_Direct Infusion\_pos\_100-1000mz.m  
 Sample Name liqinglian\_B2\_pos  
 Comment

Acquisition Date 2/8/2021 3:24:16 PM  
 Operator SCSIO  
 Instrument maXis 255552.00029

### Acquisition Parameter

|             |          |                      |          |                  |           |
|-------------|----------|----------------------|----------|------------------|-----------|
| Source Type | ESI      | Ion Polarity         | Positive | Set Nebulizer    | 0.4 Bar   |
| Focus       | Active   | Set Capillary        | 4500 V   | Set Dry Heater   | 180 °C    |
| Scan Begin  | 100 m/z  | Set End Plate Offset | -500 V   | Set Dry Gas      | 4.0 l/min |
| Scan End    | 2000 m/z | Set Charging Voltage | 0 V      | Set Divert Valve | Waste     |
|             |          | Set Corona           | 0 nA     | Set APCI Heater  | 0 °C      |

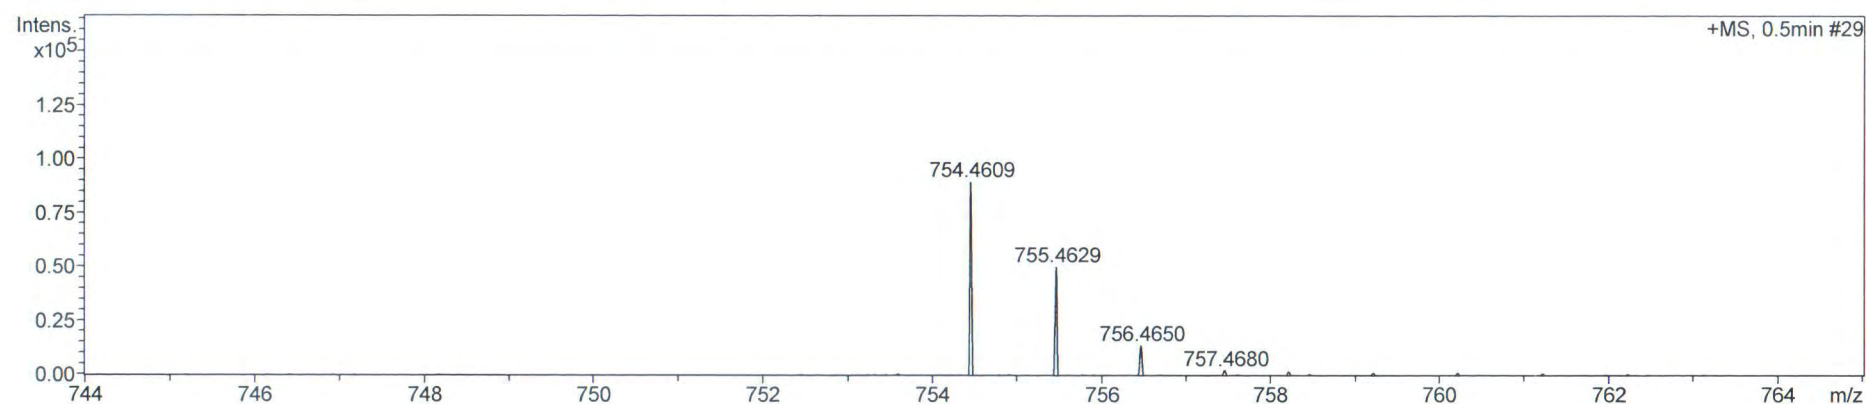

| Meas. m/z | # | Ion Formula                                                   | Score  | m/z      | err [ppm] | err [mDa] | mSigma | rdb  | e <sup>-</sup> Conf | N-Rule |
|-----------|---|---------------------------------------------------------------|--------|----------|-----------|-----------|--------|------|---------------------|--------|
| 754.4609  | 1 | C <sub>38</sub> H <sub>60</sub> N <sub>9</sub> O <sub>7</sub> | 100.00 | 754.4610 | -0.1      | -0.1      | 57.0   | 13.5 | even                | ok     |



Figures S8. The  $^1\text{H}$  NMR spectrum of **9** in  $\text{DMSO}-d_6$

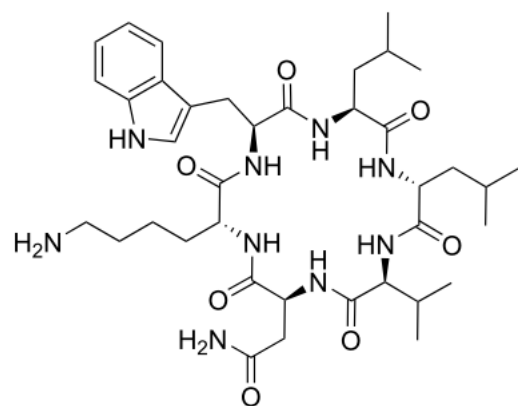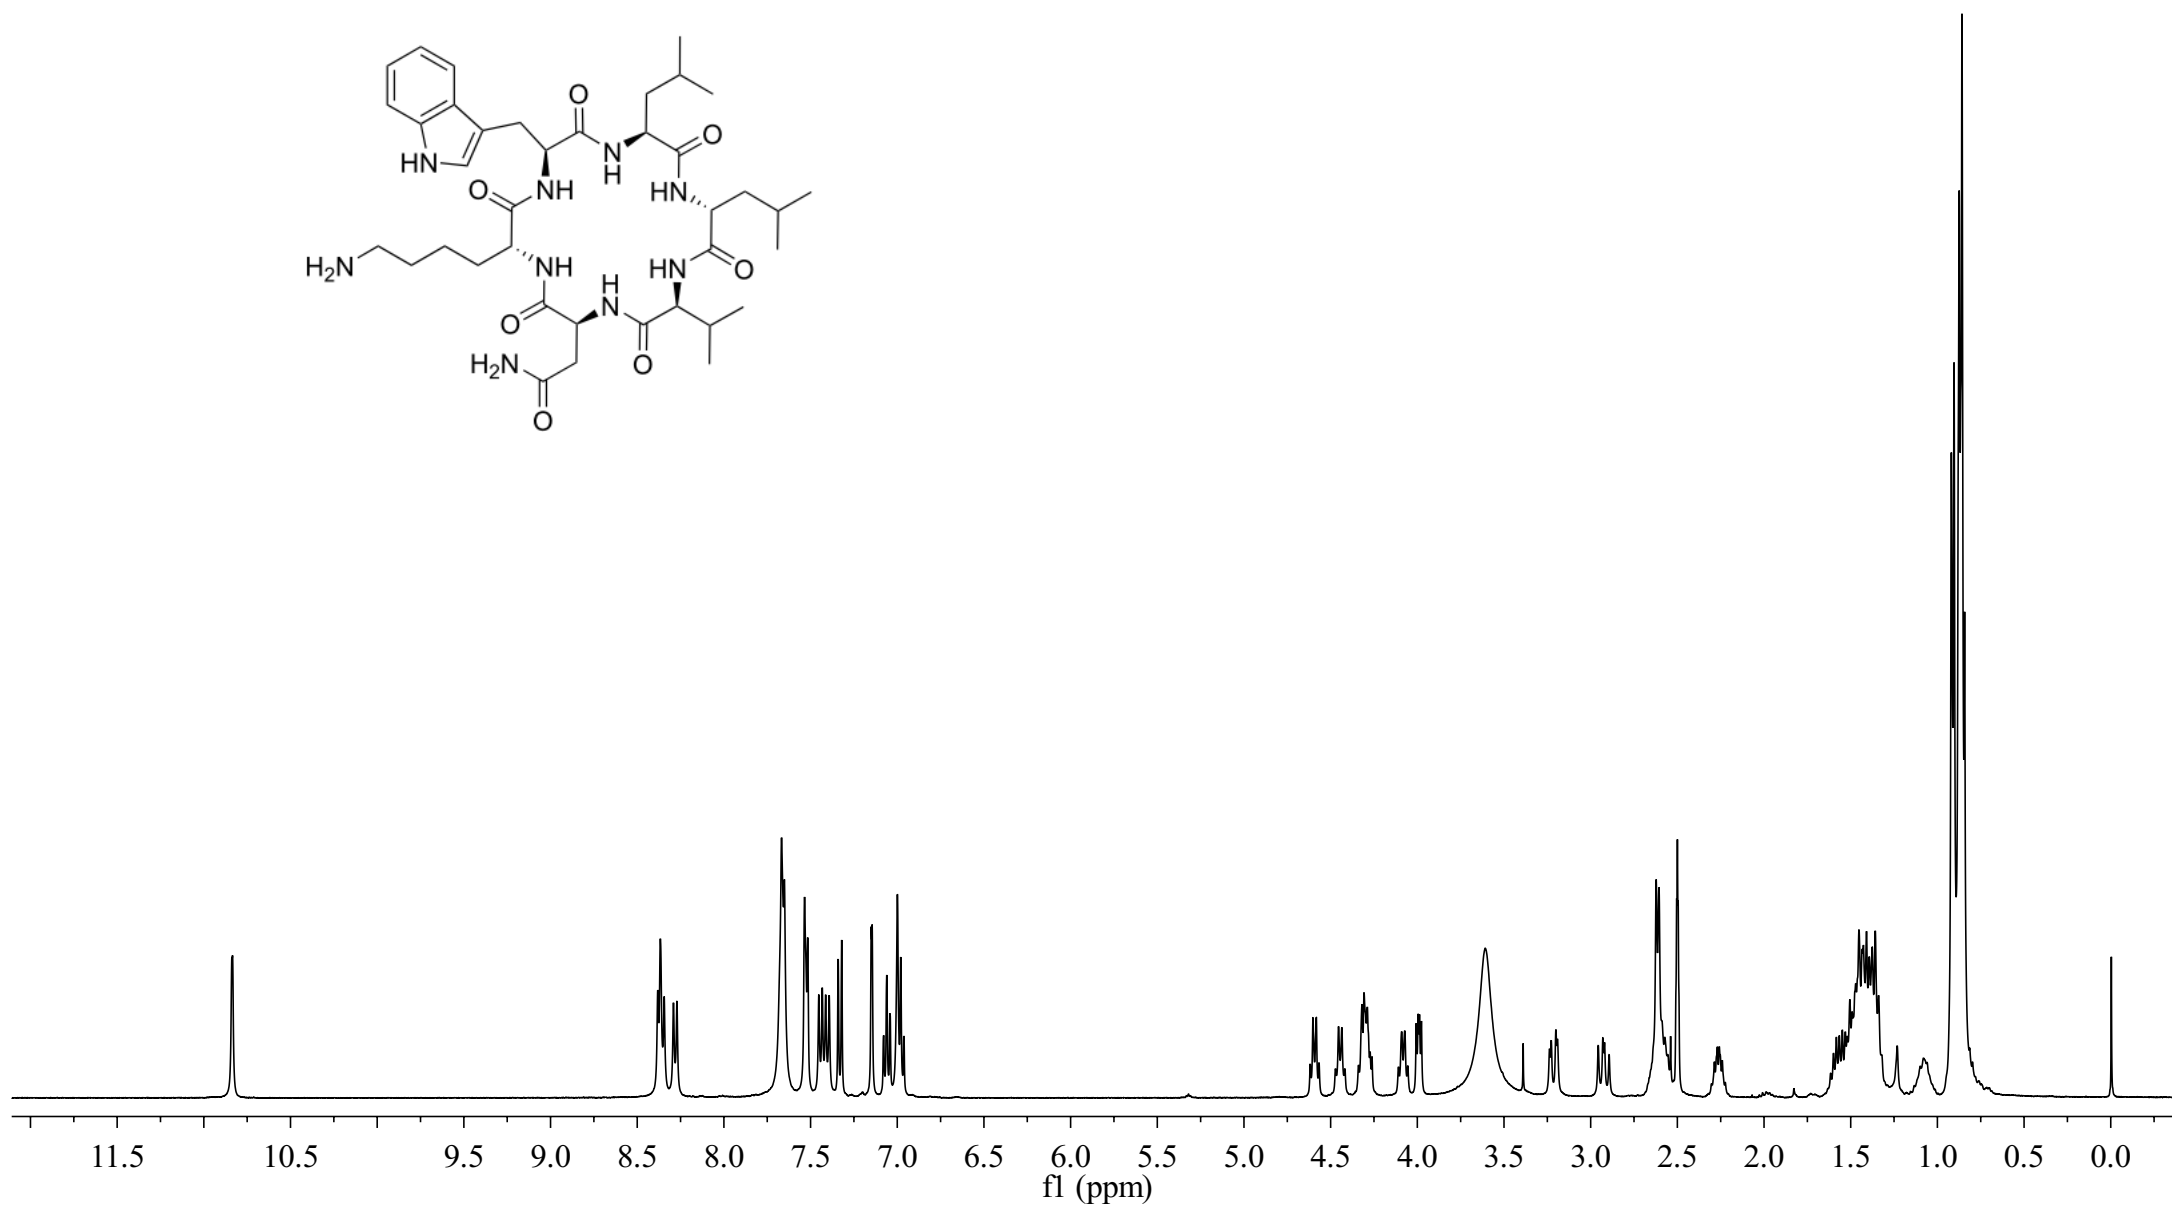

Figures S9. The  $^{13}\text{C}$  NMR spectrum of **9** in  $\text{DMSO-}d_6$

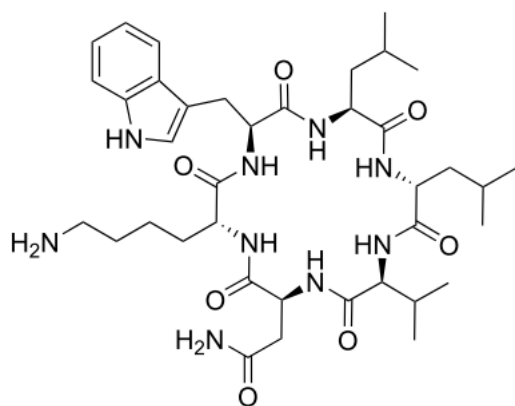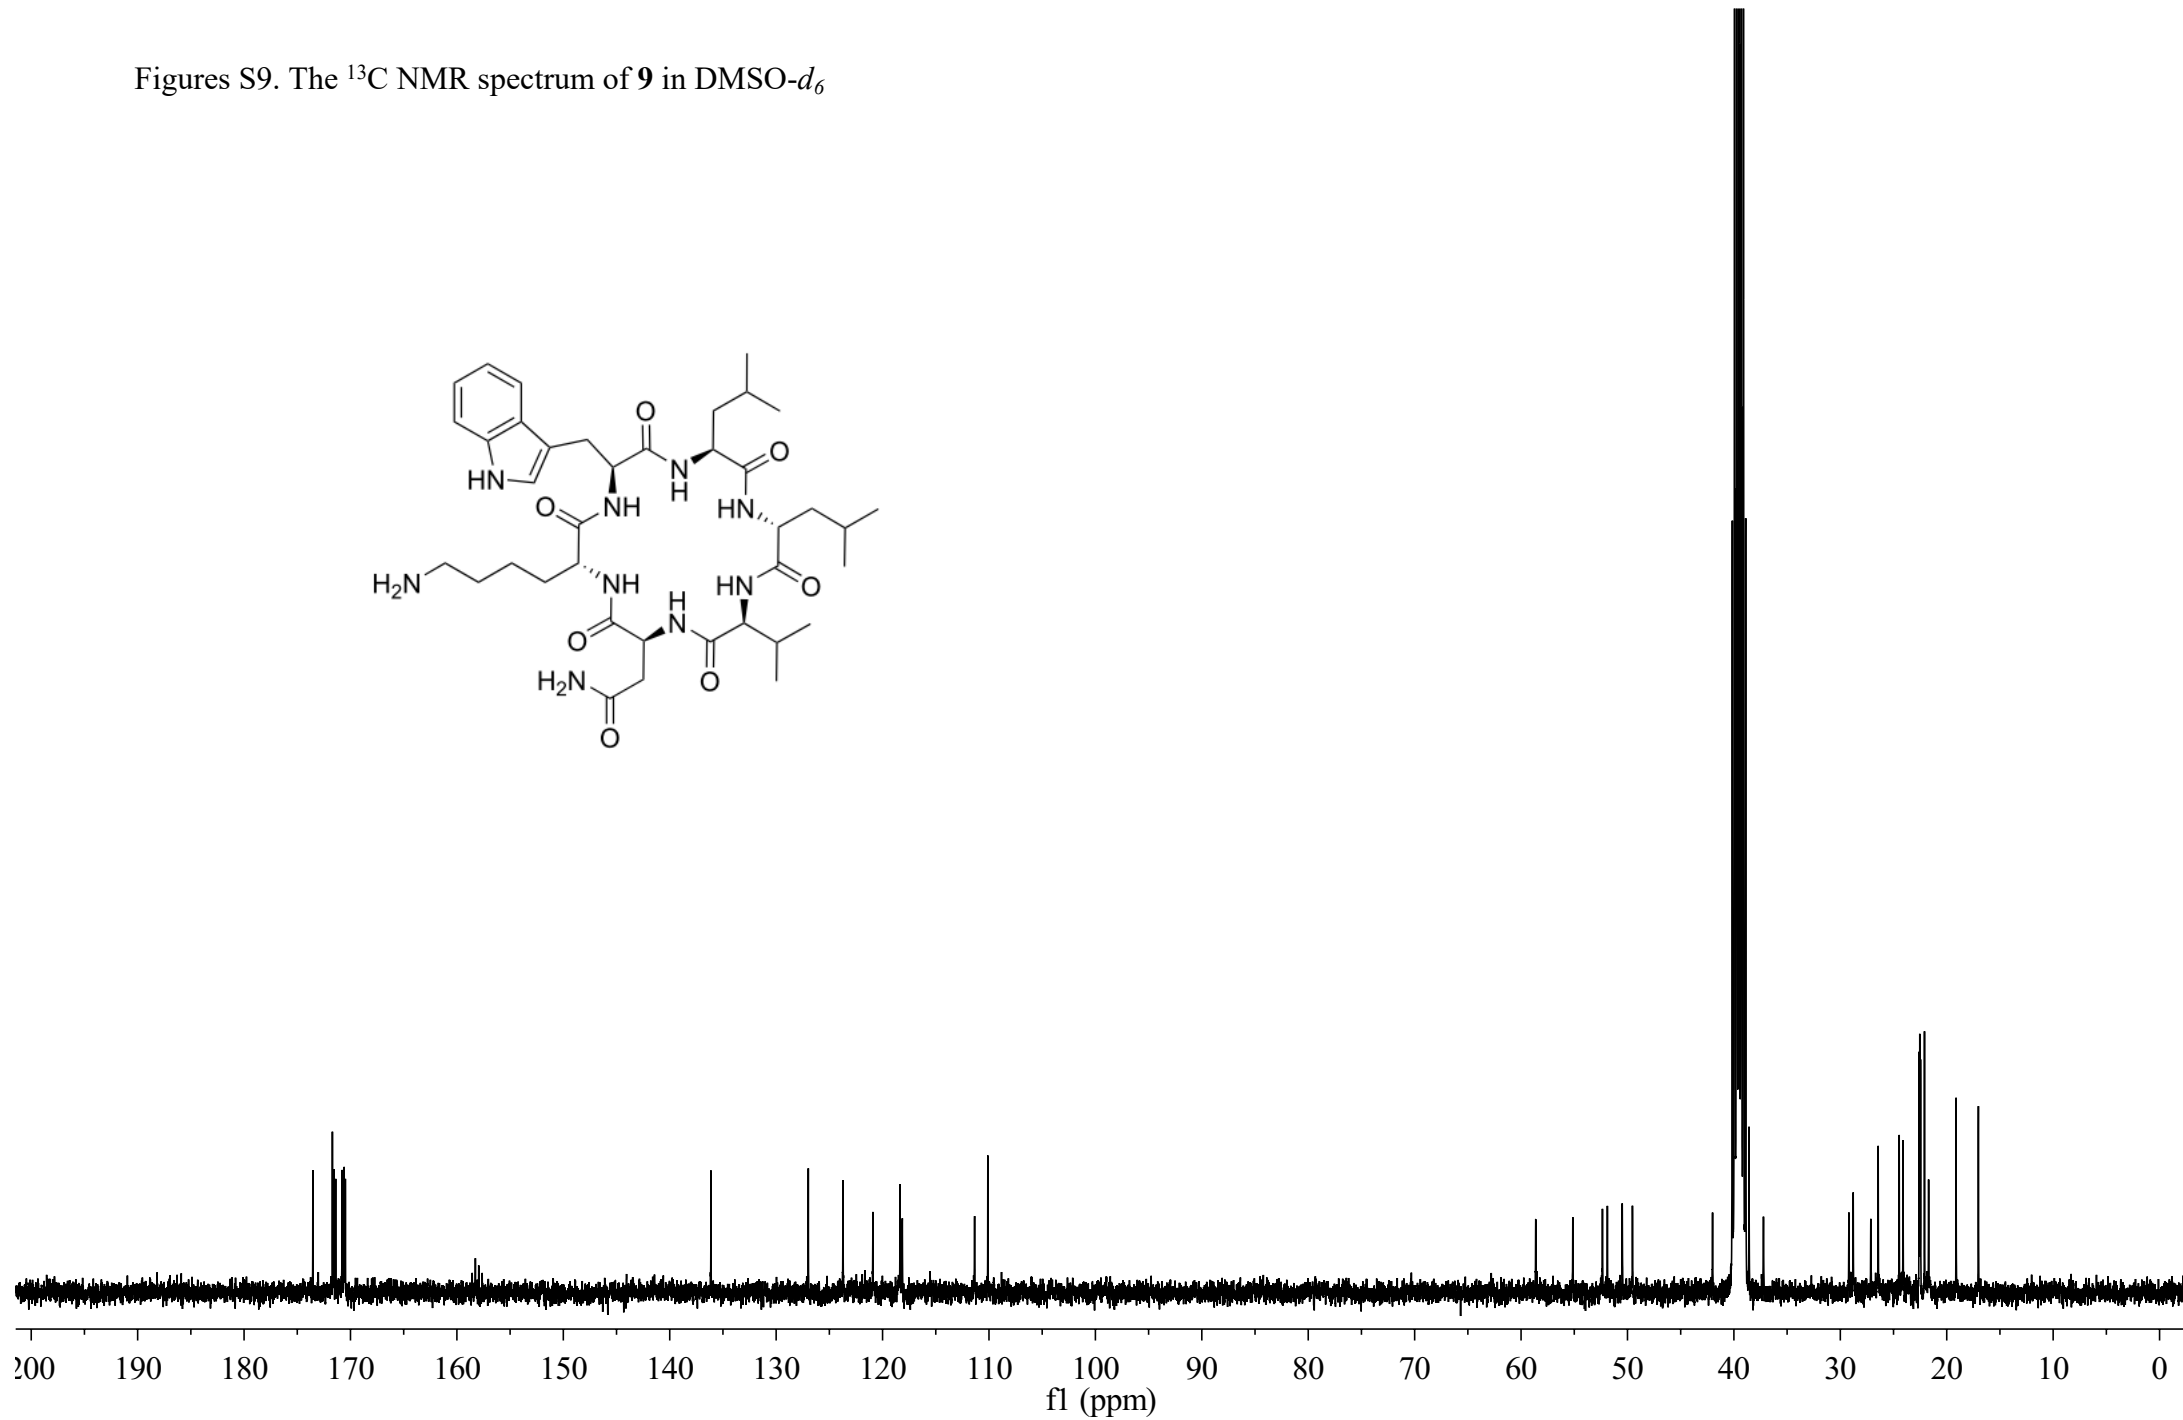

Figures S10. The HRESIMS spectrum of **10**

## Mass Spectrum SmartFormula Report

### Analysis Info

Analysis Name D:\Data\MS\data\202102\liqinglian\_A1\_pos\_52\_01\_9993.d  
 Method LC\_Direct Infusion\_pos\_100-1000mz.m  
 Sample Name liqinglian\_A1\_pos  
 Comment

Acquisition Date 2/8/2021 2:42:35 PM  
 Operator SCSIO  
 Instrument maXis 255552.00029

### Acquisition Parameter

|             |          |                      |          |                  |           |
|-------------|----------|----------------------|----------|------------------|-----------|
| Source Type | ESI      | Ion Polarity         | Positive | Set Nebulizer    | 0.4 Bar   |
| Focus       | Active   | Set Capillary        | 4500 V   | Set Dry Heater   | 180 °C    |
| Scan Begin  | 100 m/z  | Set End Plate Offset | -500 V   | Set Dry Gas      | 4.0 l/min |
| Scan End    | 2000 m/z | Set Charging Voltage | 0 V      | Set Divert Valve | Waste     |
|             |          | Set Corona           | 0 nA     | Set APCI Heater  | 0 °C      |

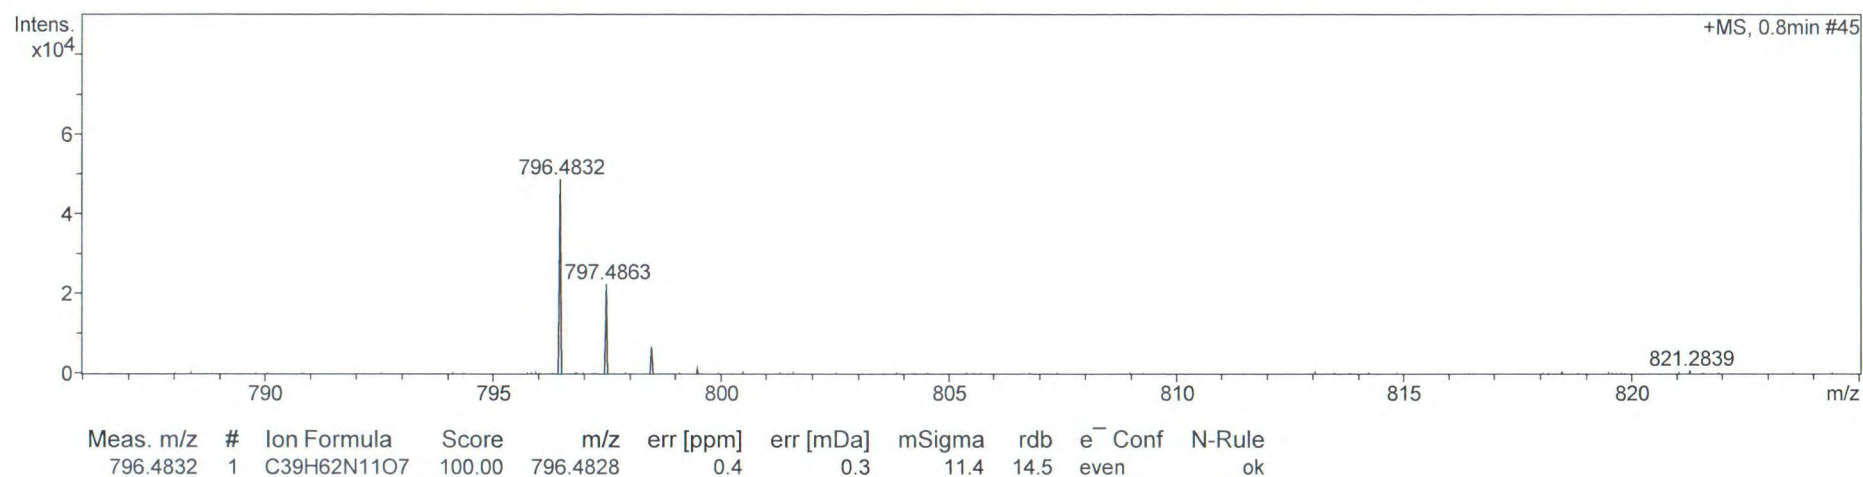

CC(C)C[C@H](C(=O)N[C@@H](C(=O)N[C@@H](Cc1c[nH]c2ccccc12)C(=O)N[C@@H](CCCCNC(=N)N)C(=O)N[C@@H](CC(=O)N)C(=O)N[C@@H](C)C)C(=O)N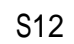

C[C@H](C)[C@@H](NC(=O)N[C@@H](Cc1c[nH]c2ccccc12)C(=O)NCC[C@H](N)C(=O)N[C@@H](C)C(=O)N[C@@H](C)C(=O)NCCC(N)=N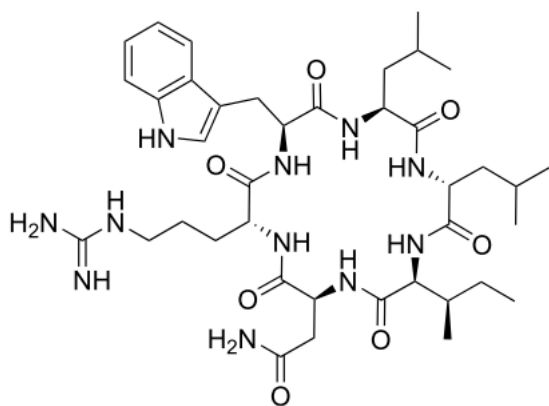

Figures S13. The HRESIMS spectrum of **11**

## Mass Spectrum SmartFormula Report

### Analysis Info

Analysis Name D:\Data\MS\data\202102\liqinglian\_A2\_pos\_53\_01\_9994.d  
 Method LC\_Direct Infusion\_pos\_100-1000mz.m  
 Sample Name liqinglian\_A2\_pos  
 Comment

Acquisition Date 2/8/2021 2:46:04 PM  
 Operator SCSIO  
 Instrument maXis 255552.00029

### Acquisition Parameter

|             |          |                      |          |                  |           |
|-------------|----------|----------------------|----------|------------------|-----------|
| Source Type | ESI      | Ion Polarity         | Positive | Set Nebulizer    | 0.4 Bar   |
| Focus       | Active   | Set Capillary        | 4500 V   | Set Dry Heater   | 180 °C    |
| Scan Begin  | 100 m/z  | Set End Plate Offset | -500 V   | Set Dry Gas      | 4.0 l/min |
| Scan End    | 2000 m/z | Set Charging Voltage | 0 V      | Set Divert Valve | Waste     |
|             |          | Set Corona           | 0 nA     | Set APCI Heater  | 0 °C      |

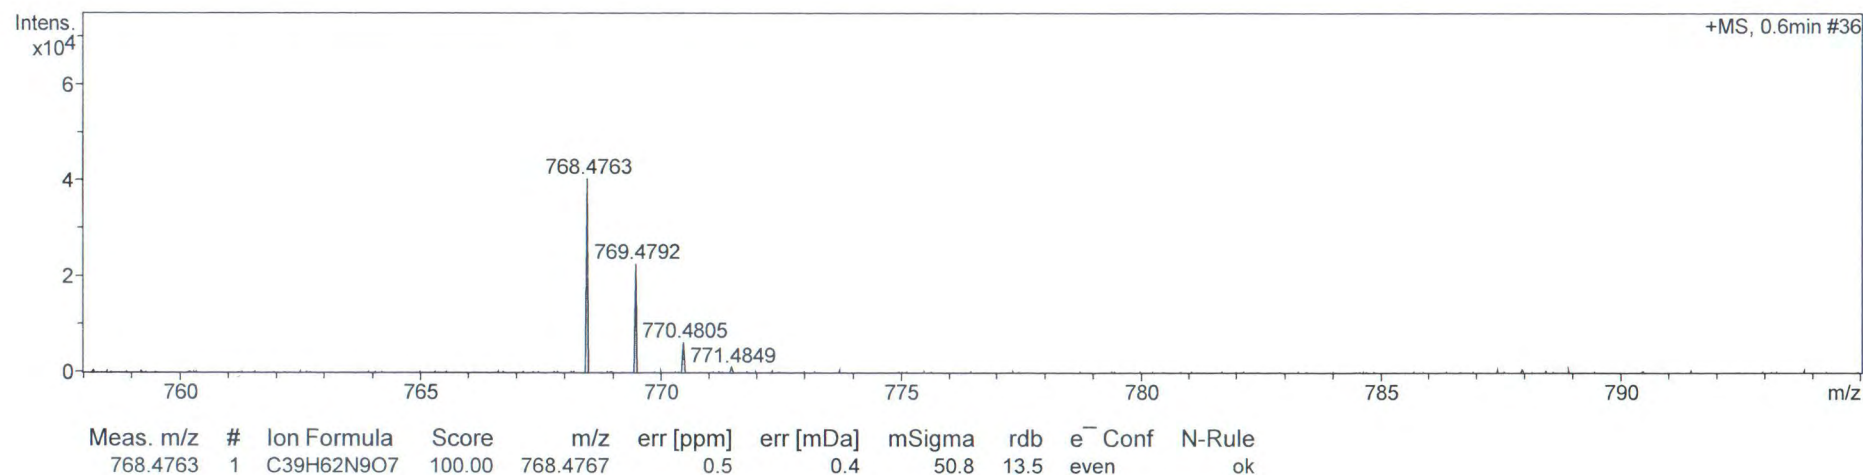

Figures S14. The  $^1\text{H}$  NMR spectrum of **11** in  $\text{DMSO-}d_6$

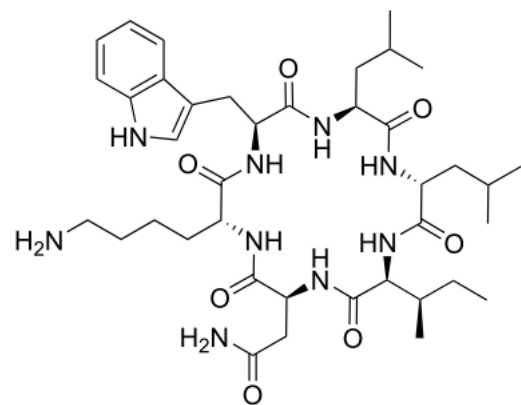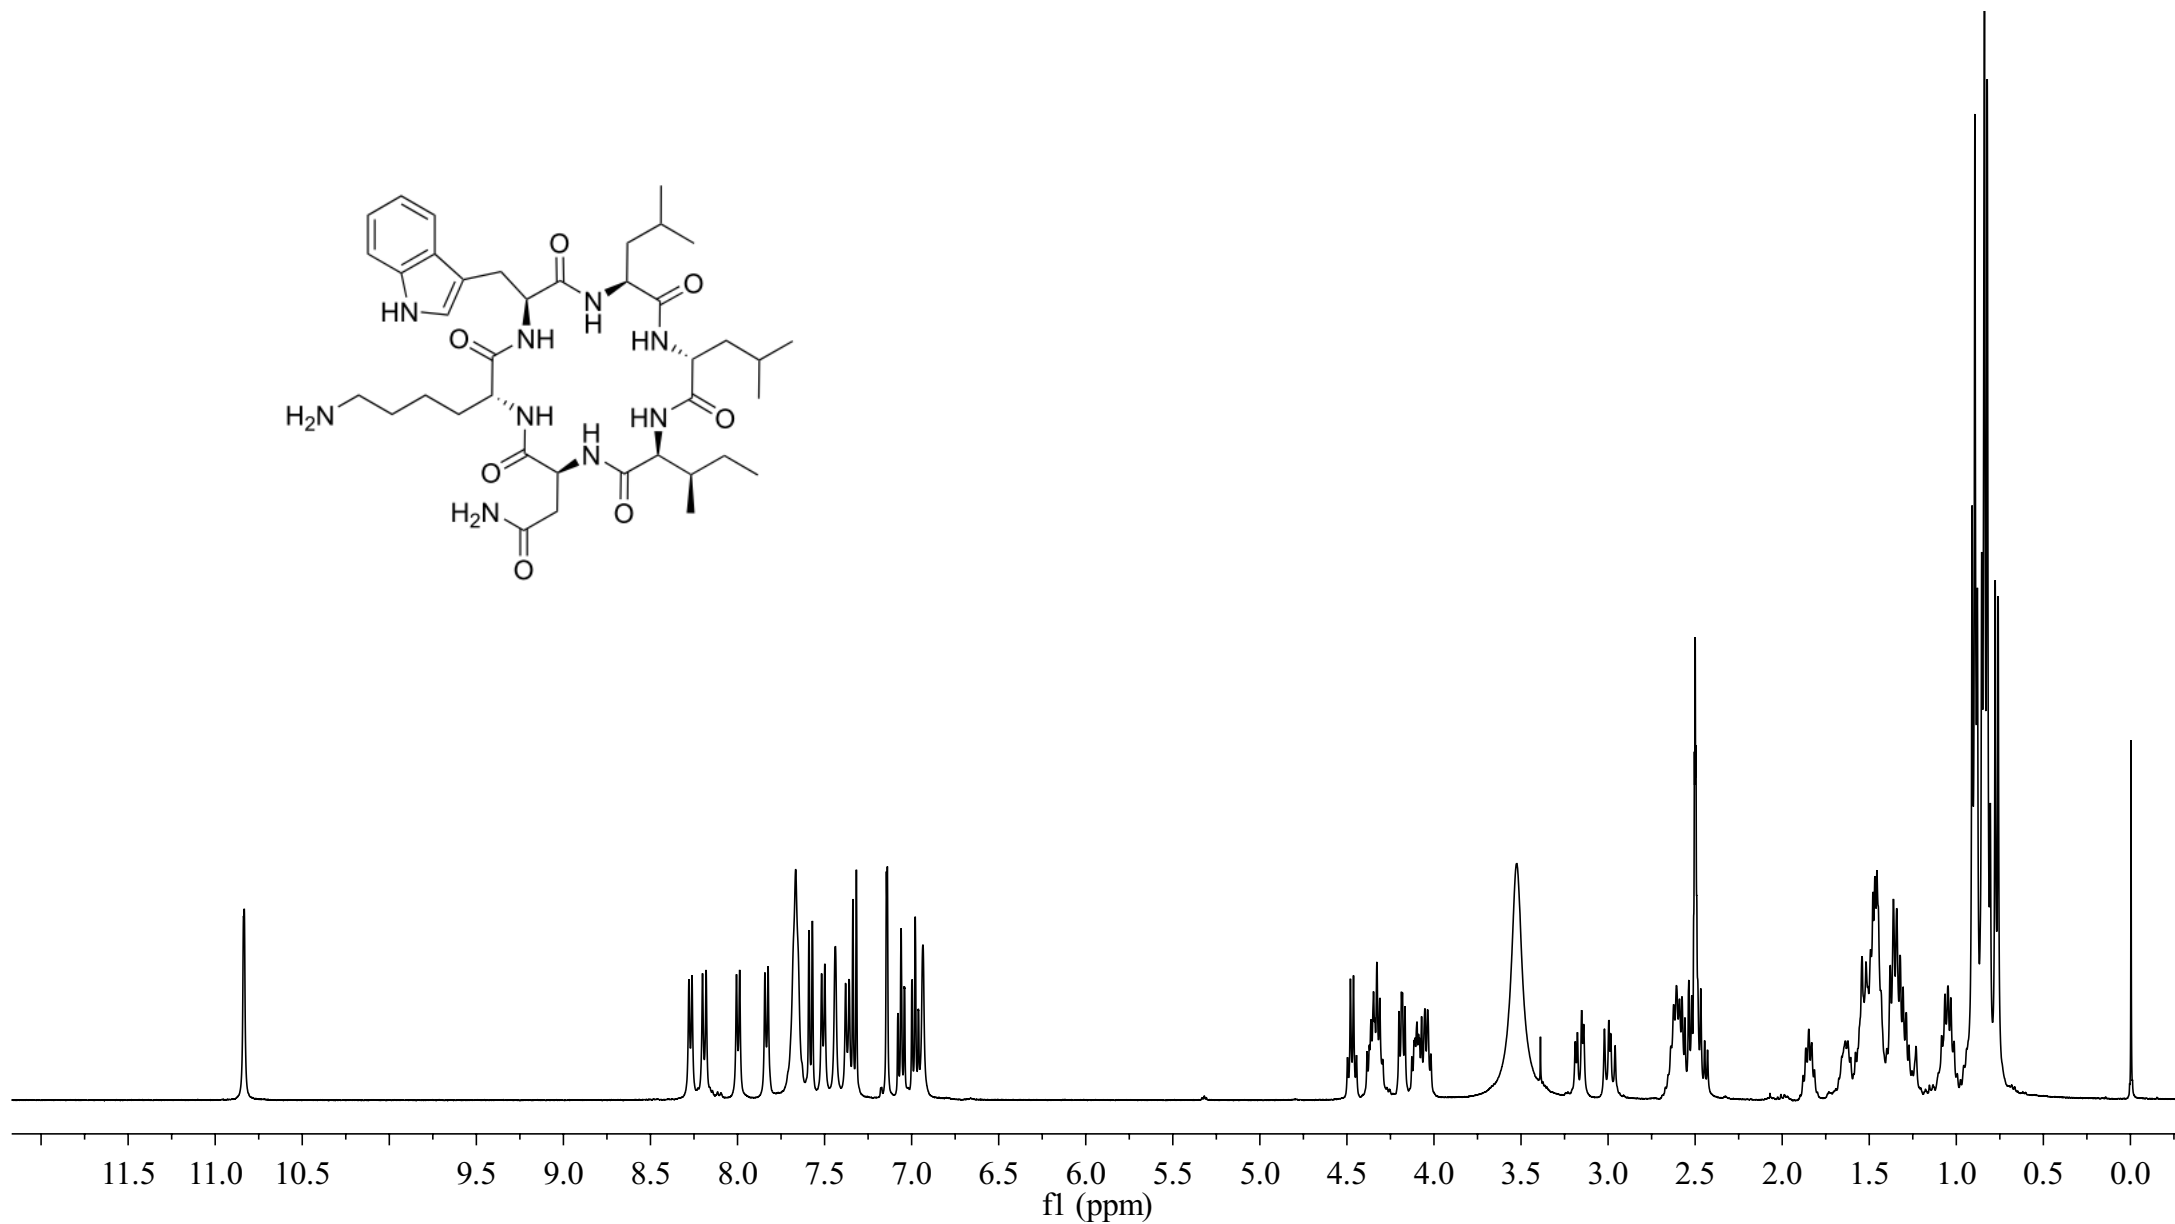

Figures S15. The  $^{13}\text{C}$  NMR spectrum of 11 in  $\text{DMSO}-d_6$

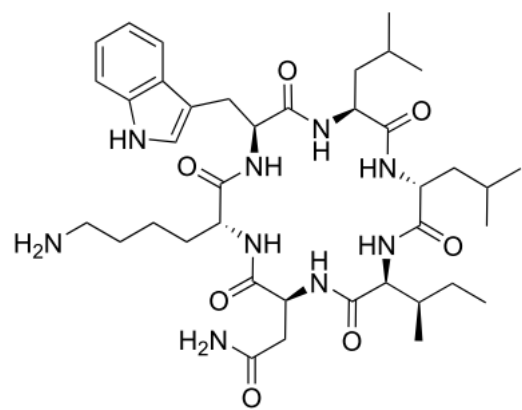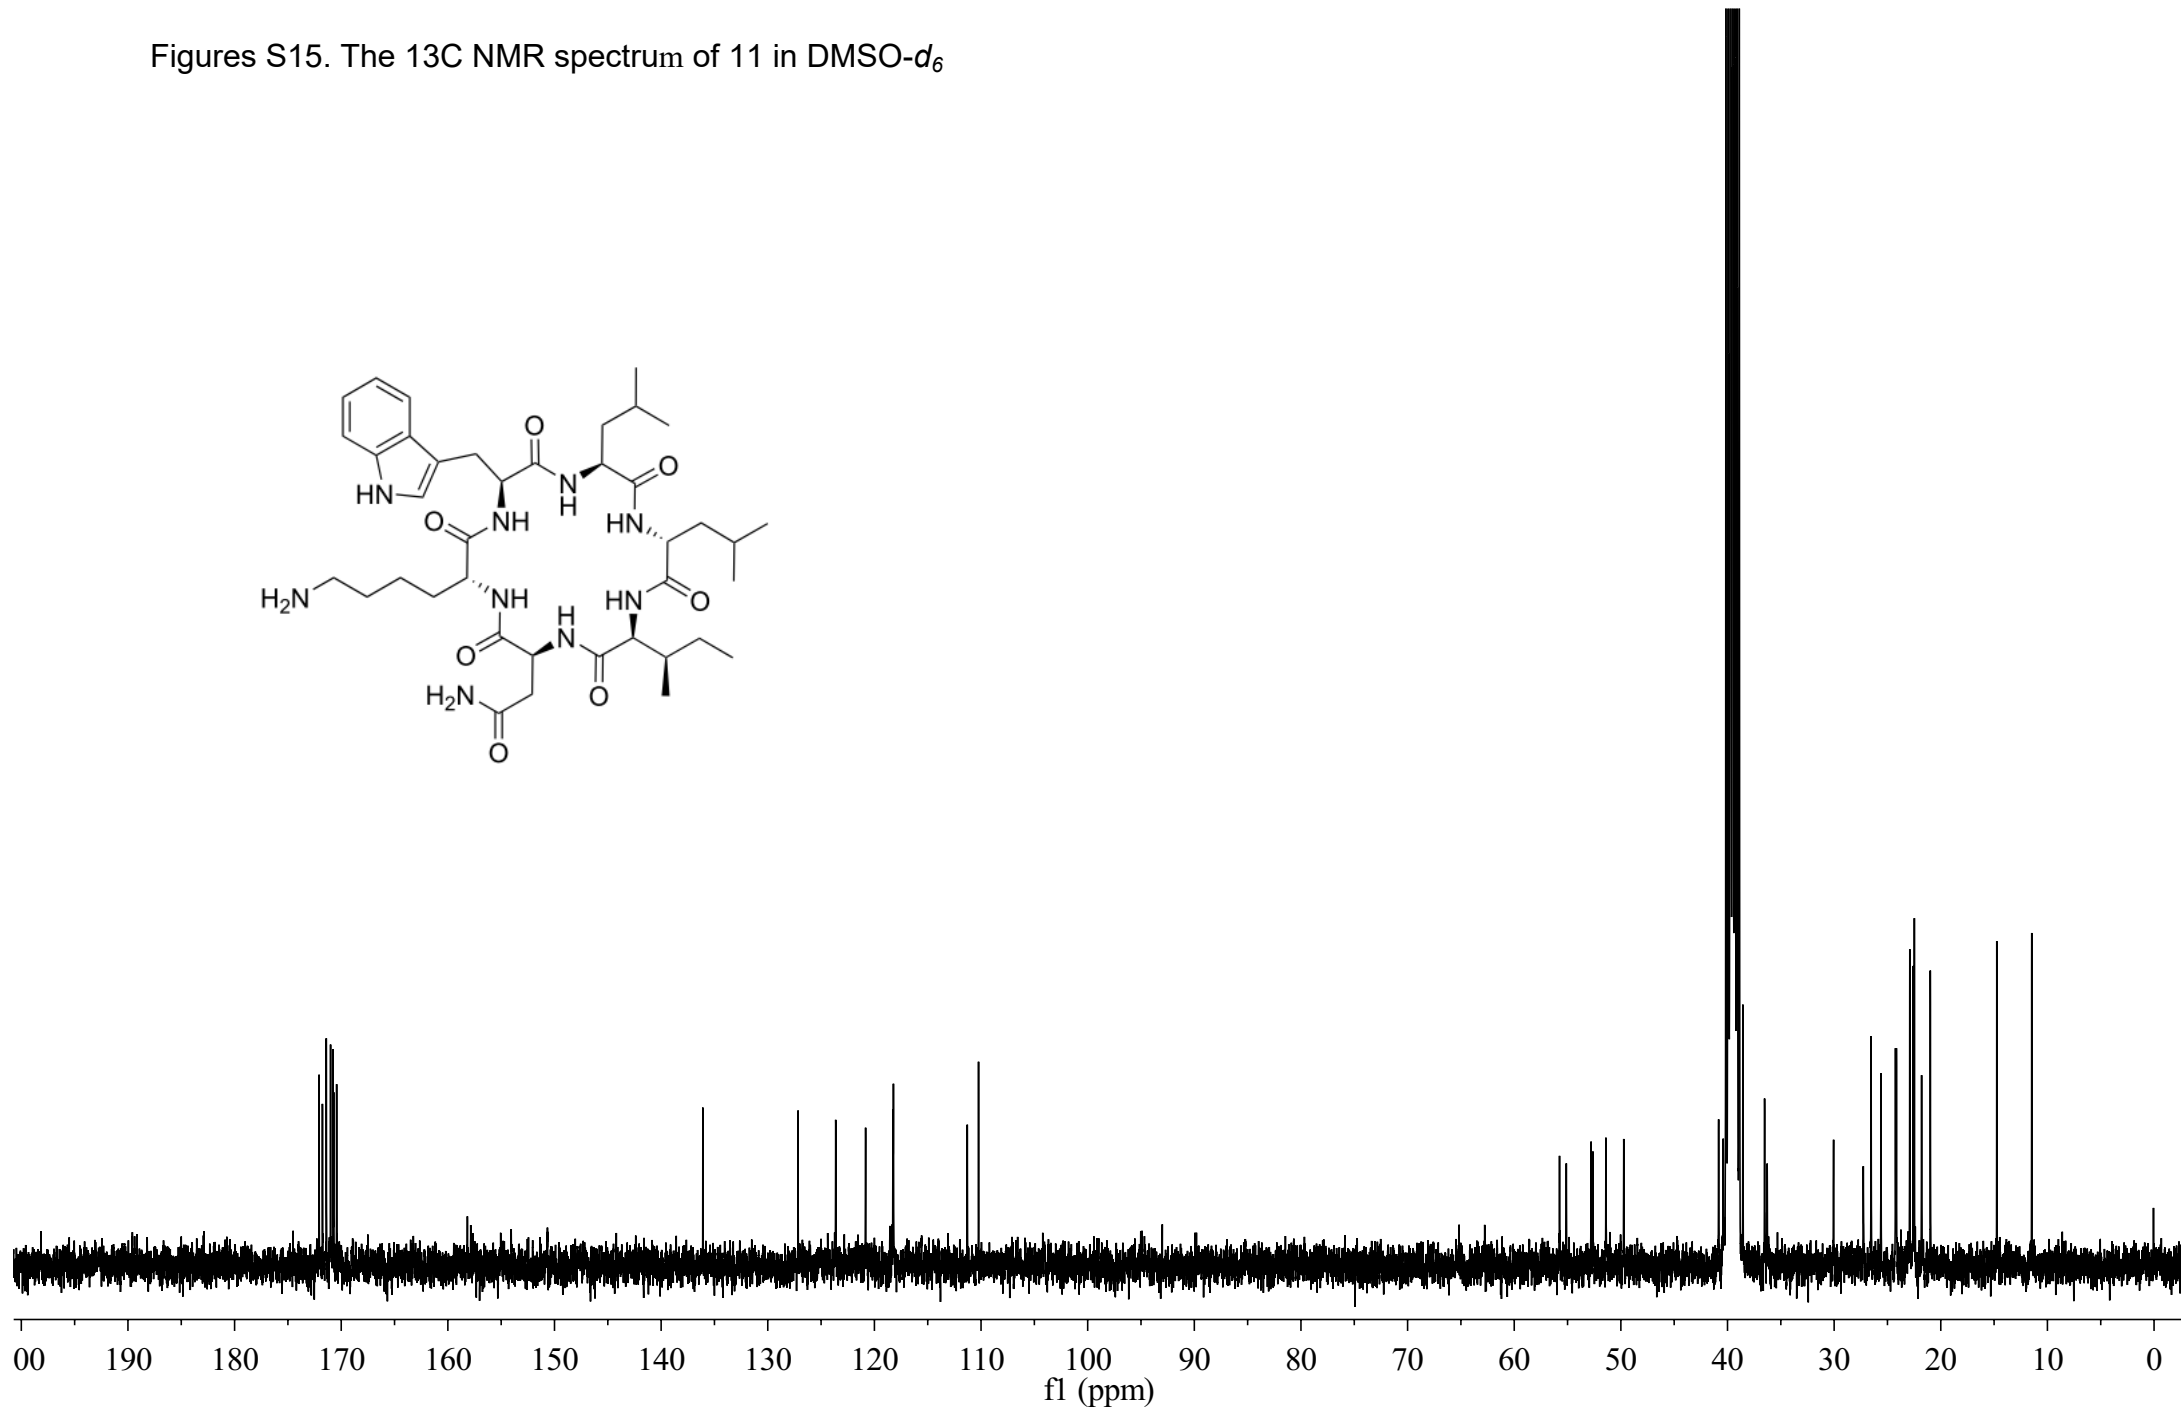



Figures S16. The HRESIMS spectrum of **12**

## Mass Spectrum SmartFormula Report

### Analysis Info

Analysis Name D:\Data\MS\data\202102\liqinglian\_A3\_pos\_54\_01\_9995.d  
 Method LC\_Direct Infusion\_pos\_100-1000mz.m  
 Sample Name liqinglian\_A3\_pos  
 Comment

Acquisition Date 2/8/2021 2:49:33 PM  
 Operator SCSIO  
 Instrument maXis 255552.00029

### Acquisition Parameter

|             |          |                      |          |                  |           |
|-------------|----------|----------------------|----------|------------------|-----------|
| Source Type | ESI      | Ion Polarity         | Positive | Set Nebulizer    | 0.4 Bar   |
| Focus       | Active   | Set Capillary        | 4500 V   | Set Dry Heater   | 180 °C    |
| Scan Begin  | 100 m/z  | Set End Plate Offset | -500 V   | Set Dry Gas      | 4.0 l/min |
| Scan End    | 2000 m/z | Set Charging Voltage | 0 V      | Set Divert Valve | Waste     |
|             |          | Set Corona           | 0 nA     | Set APCI Heater  | 0 °C      |

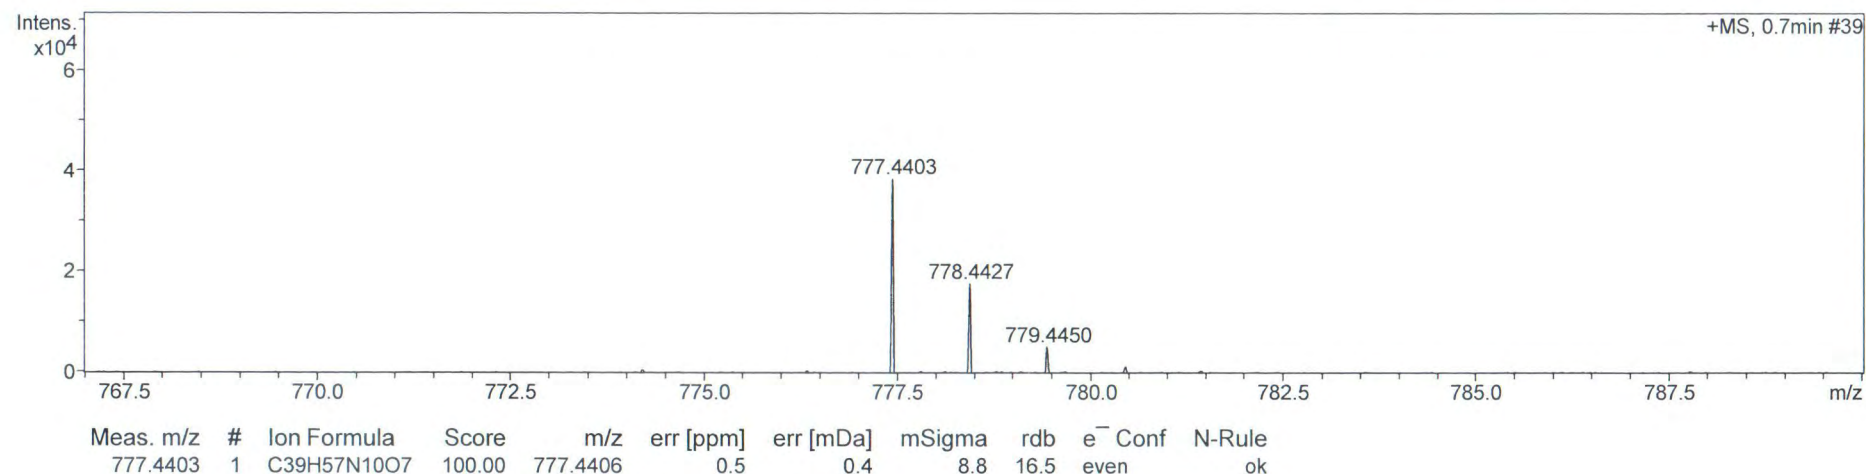

Figures S17. The  $^1\text{H}$  NMR spectrum of 12 in  $\text{DMSO-}d_6$

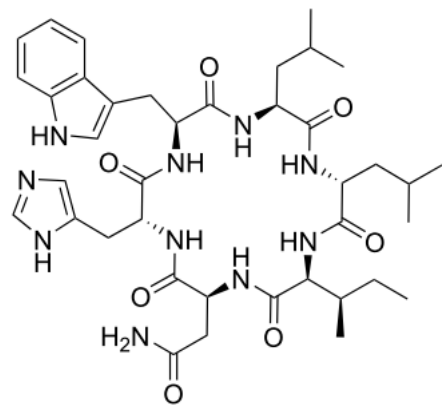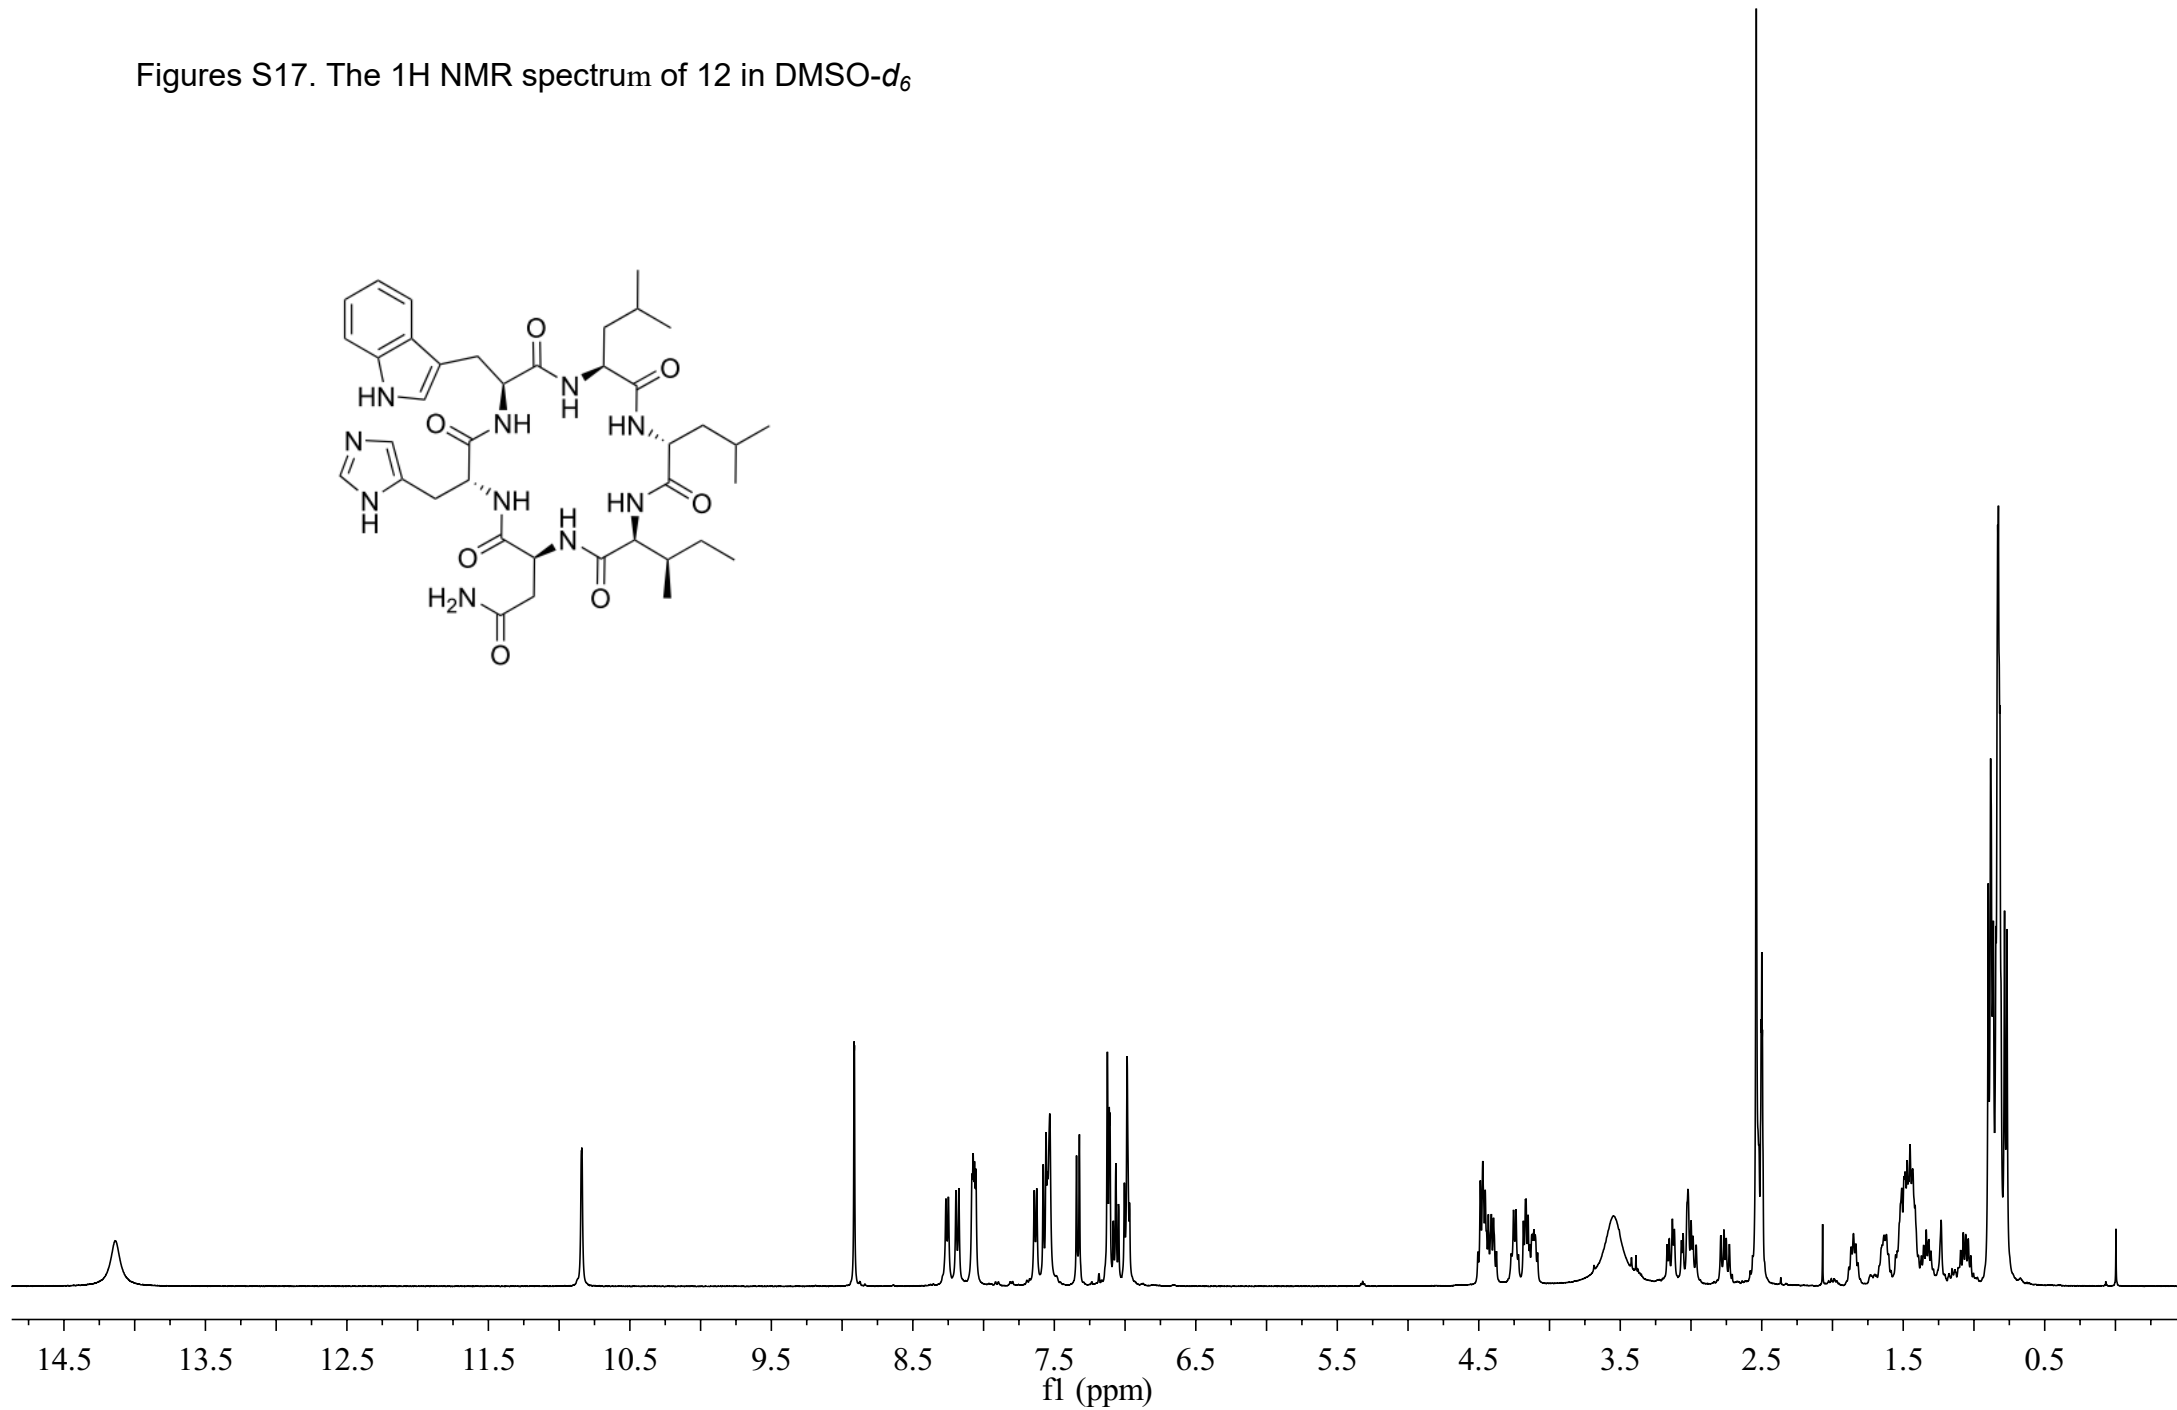

Figures S18. The  $^{13}\text{C}$  NMR spectrum of 12 in  $\text{DMSO}-d_6$

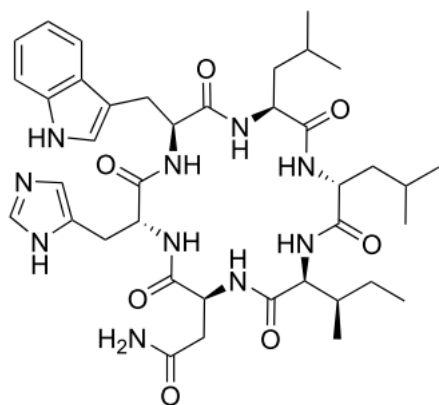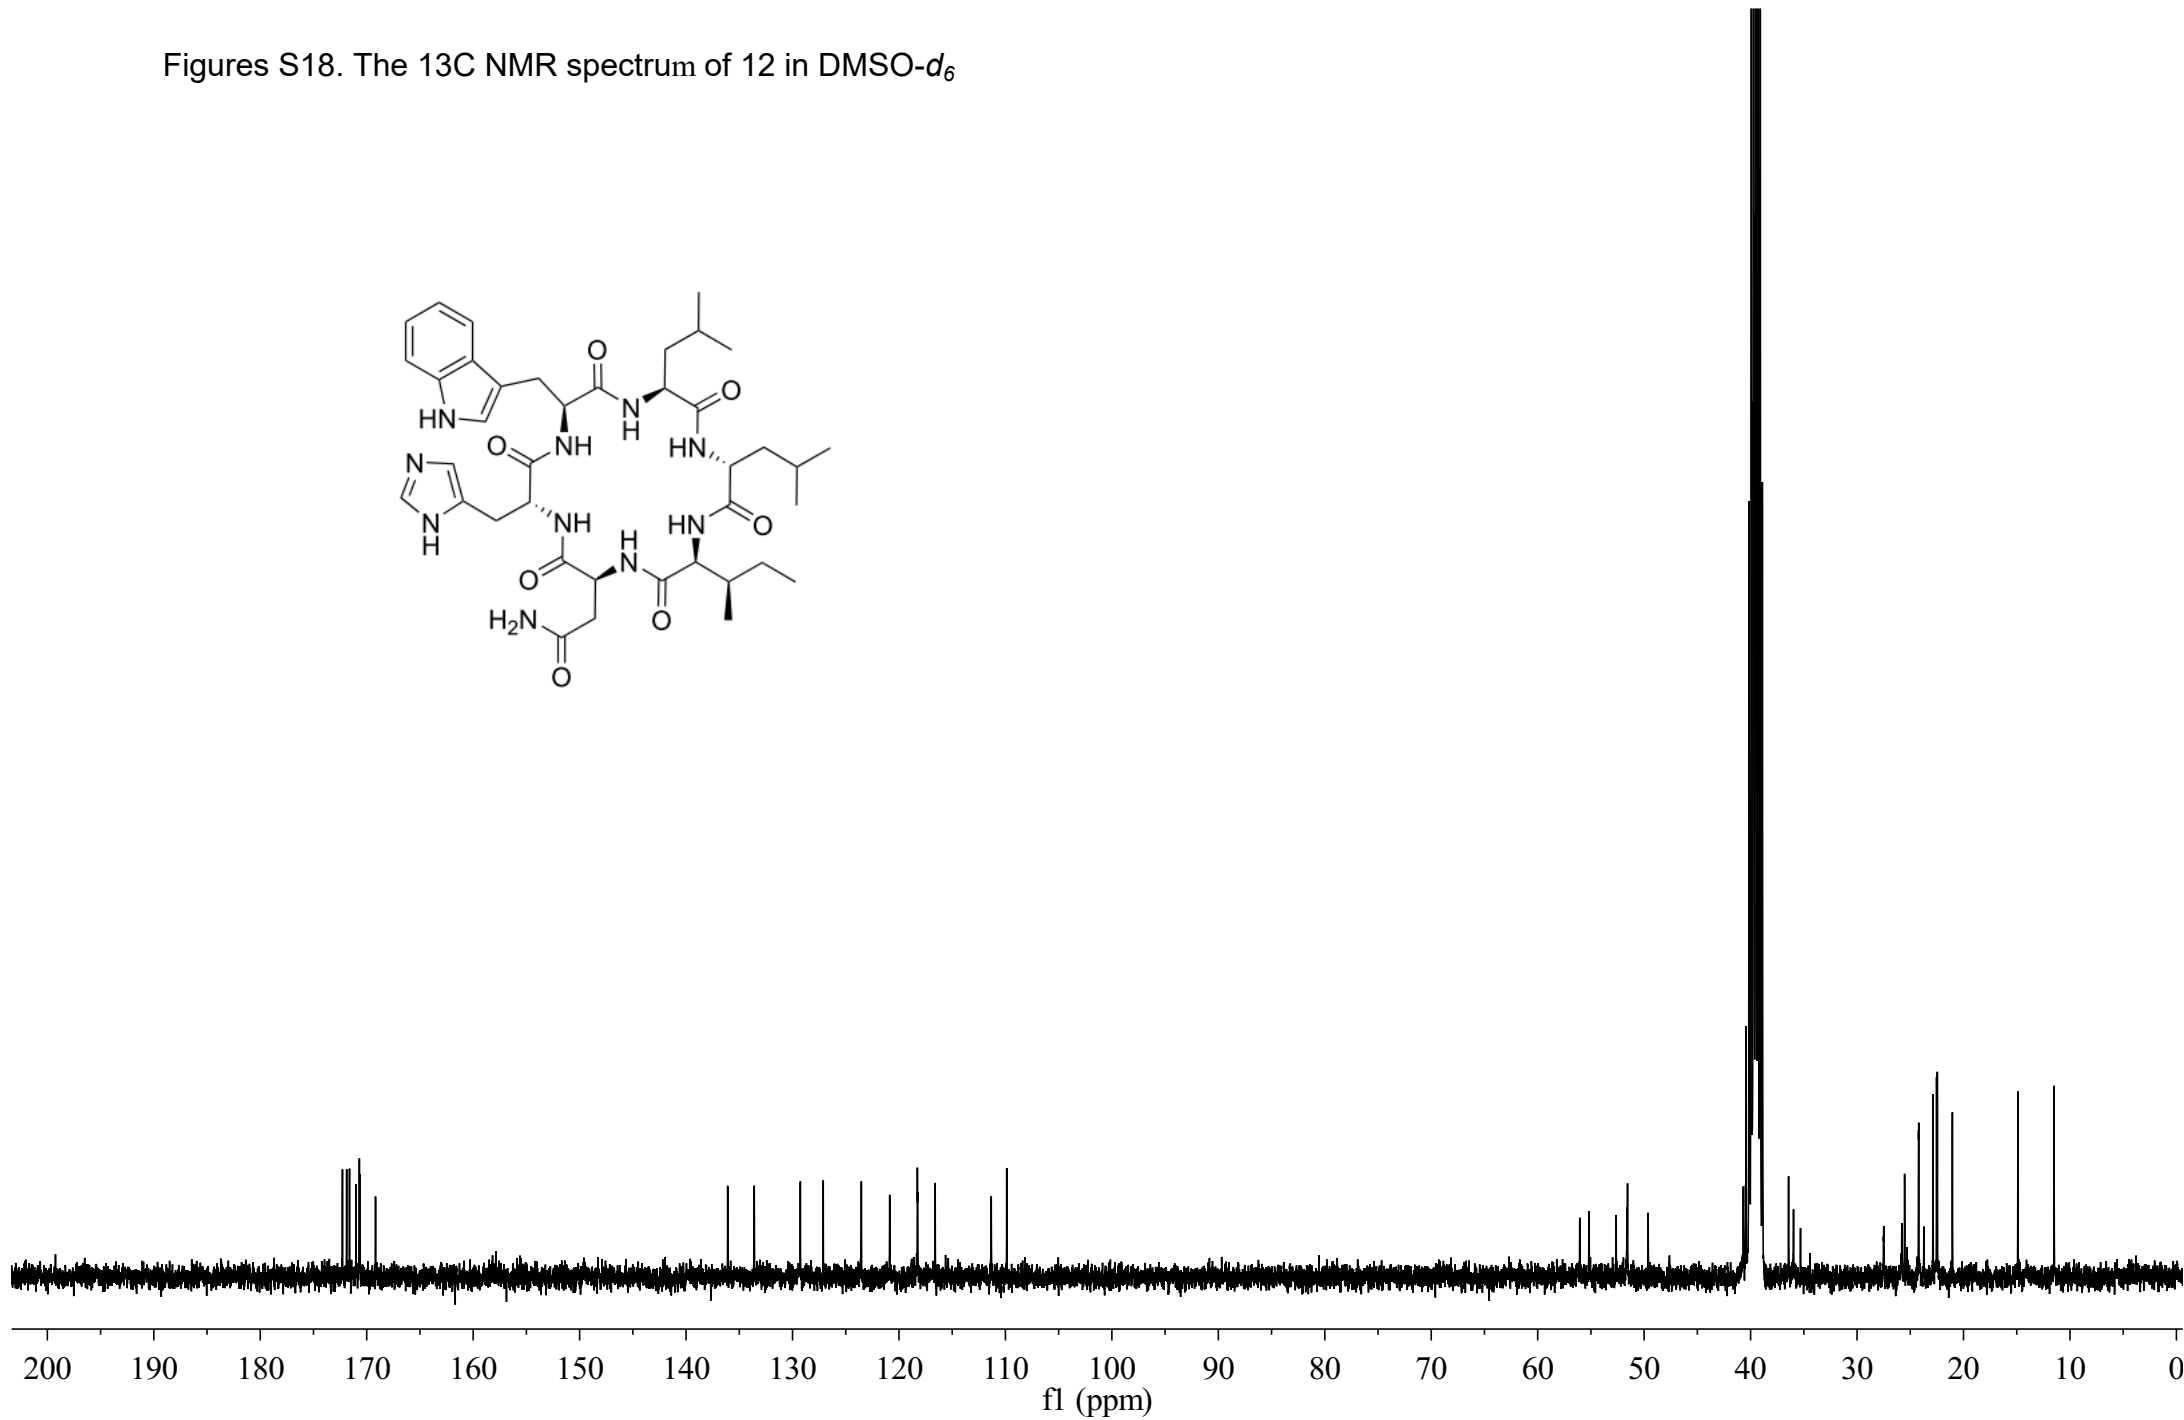

Figures S19. The HRESIMS spectrum of **13**

## Mass Spectrum SmartFormula Report

### Analysis Info

Analysis Name D:\Data\MS\data\202102\liqinglian\_A5\_pos\_55\_01\_9996.d  
 Method LC\_Direct Infusion\_pos\_100-1000mz.m  
 Sample Name liqinglian\_A5\_pos  
 Comment

Acquisition Date 2/8/2021 2:53:01 PM  
 Operator SCSIO  
 Instrument maXis 255552.00029

### Acquisition Parameter

|             |          |                      |          |                  |           |
|-------------|----------|----------------------|----------|------------------|-----------|
| Source Type | ESI      | Ion Polarity         | Positive | Set Nebulizer    | 0.4 Bar   |
| Focus       | Active   | Set Capillary        | 4500 V   | Set Dry Heater   | 180 °C    |
| Scan Begin  | 100 m/z  | Set End Plate Offset | -500 V   | Set Dry Gas      | 4.0 l/min |
| Scan End    | 2000 m/z | Set Charging Voltage | 0 V      | Set Divert Valve | Waste     |
|             |          | Set Corona           | 0 nA     | Set APCI Heater  | 0 °C      |

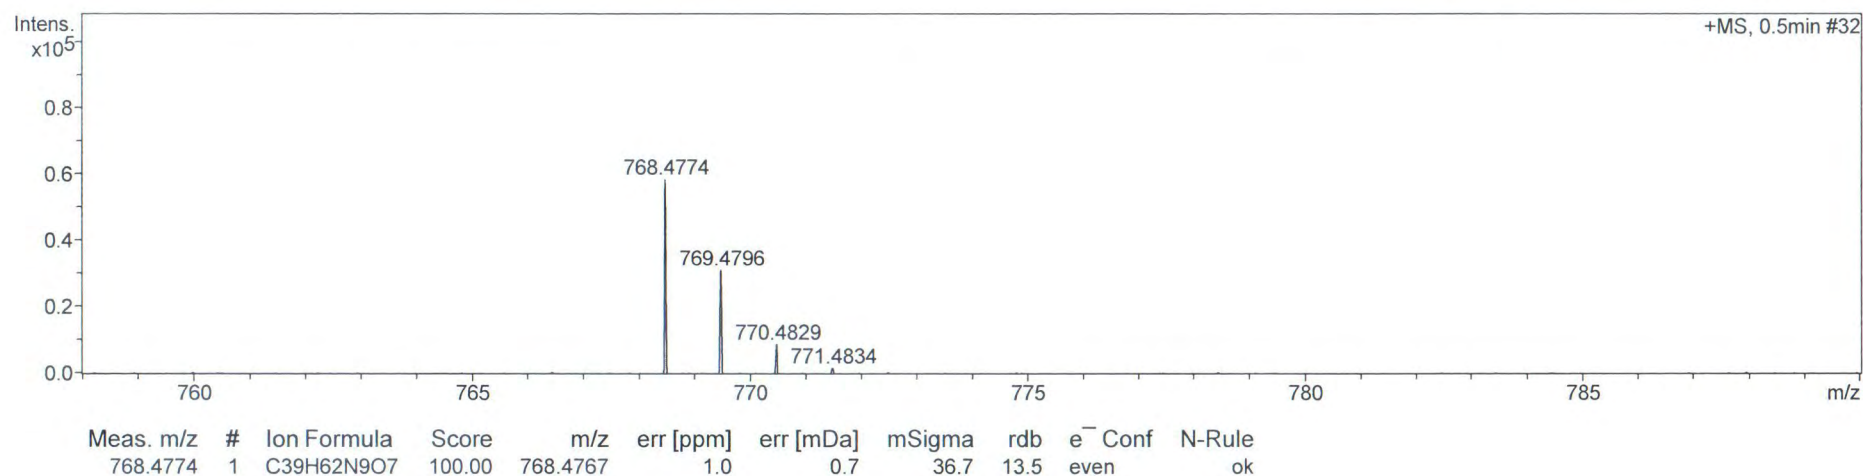

liqinglian\_A5\_pos\_55\_01\_9996.d

Bruker Compass DataAnalysis 4.1

printed: 2/8/2021 2:57:14 PM

by: SCSIO

Page 1 of 1

Figures S20. The  $^1\text{H}$  NMR spectrum of 13 in  $\text{DMSO}-d_6$

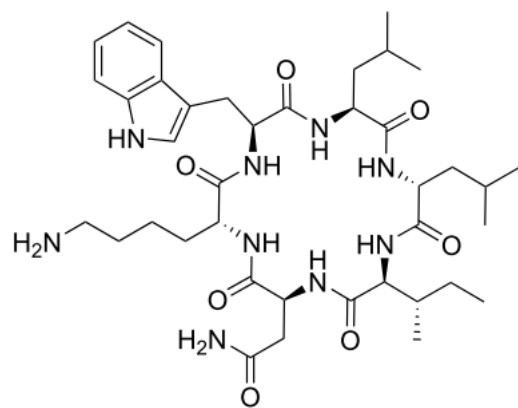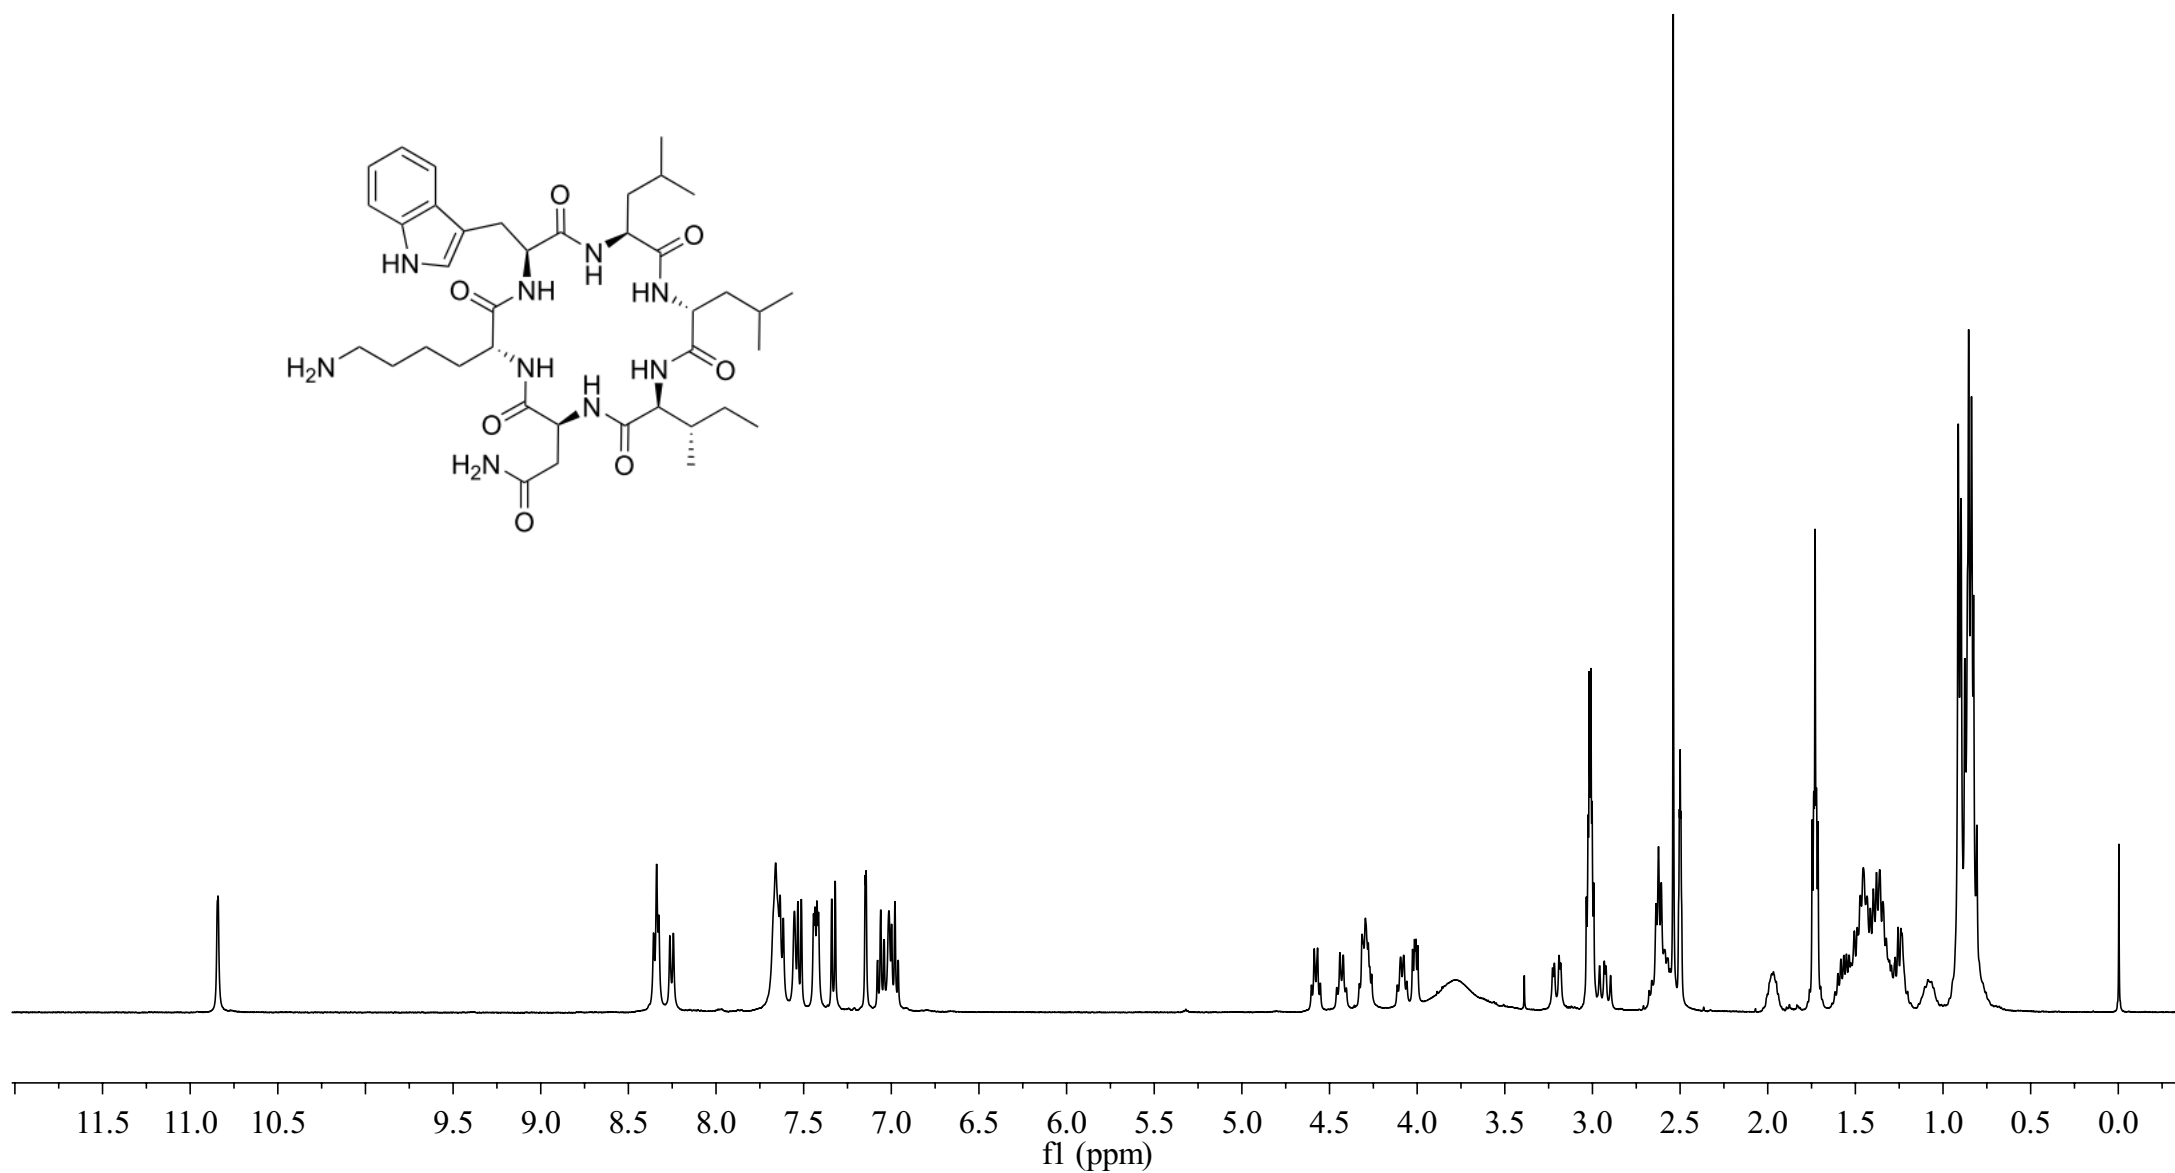

Figures S21. The  $^{13}\text{C}$  NMR spectrum of 13 in  $\text{DMSO}-d_6$

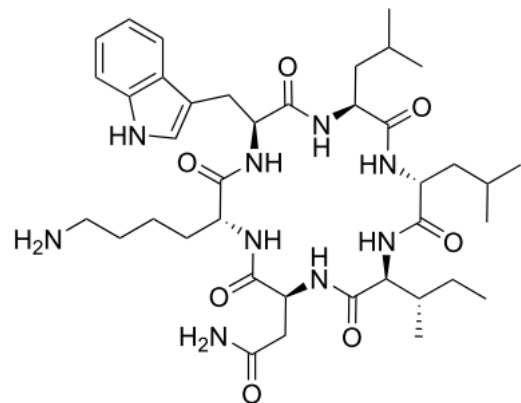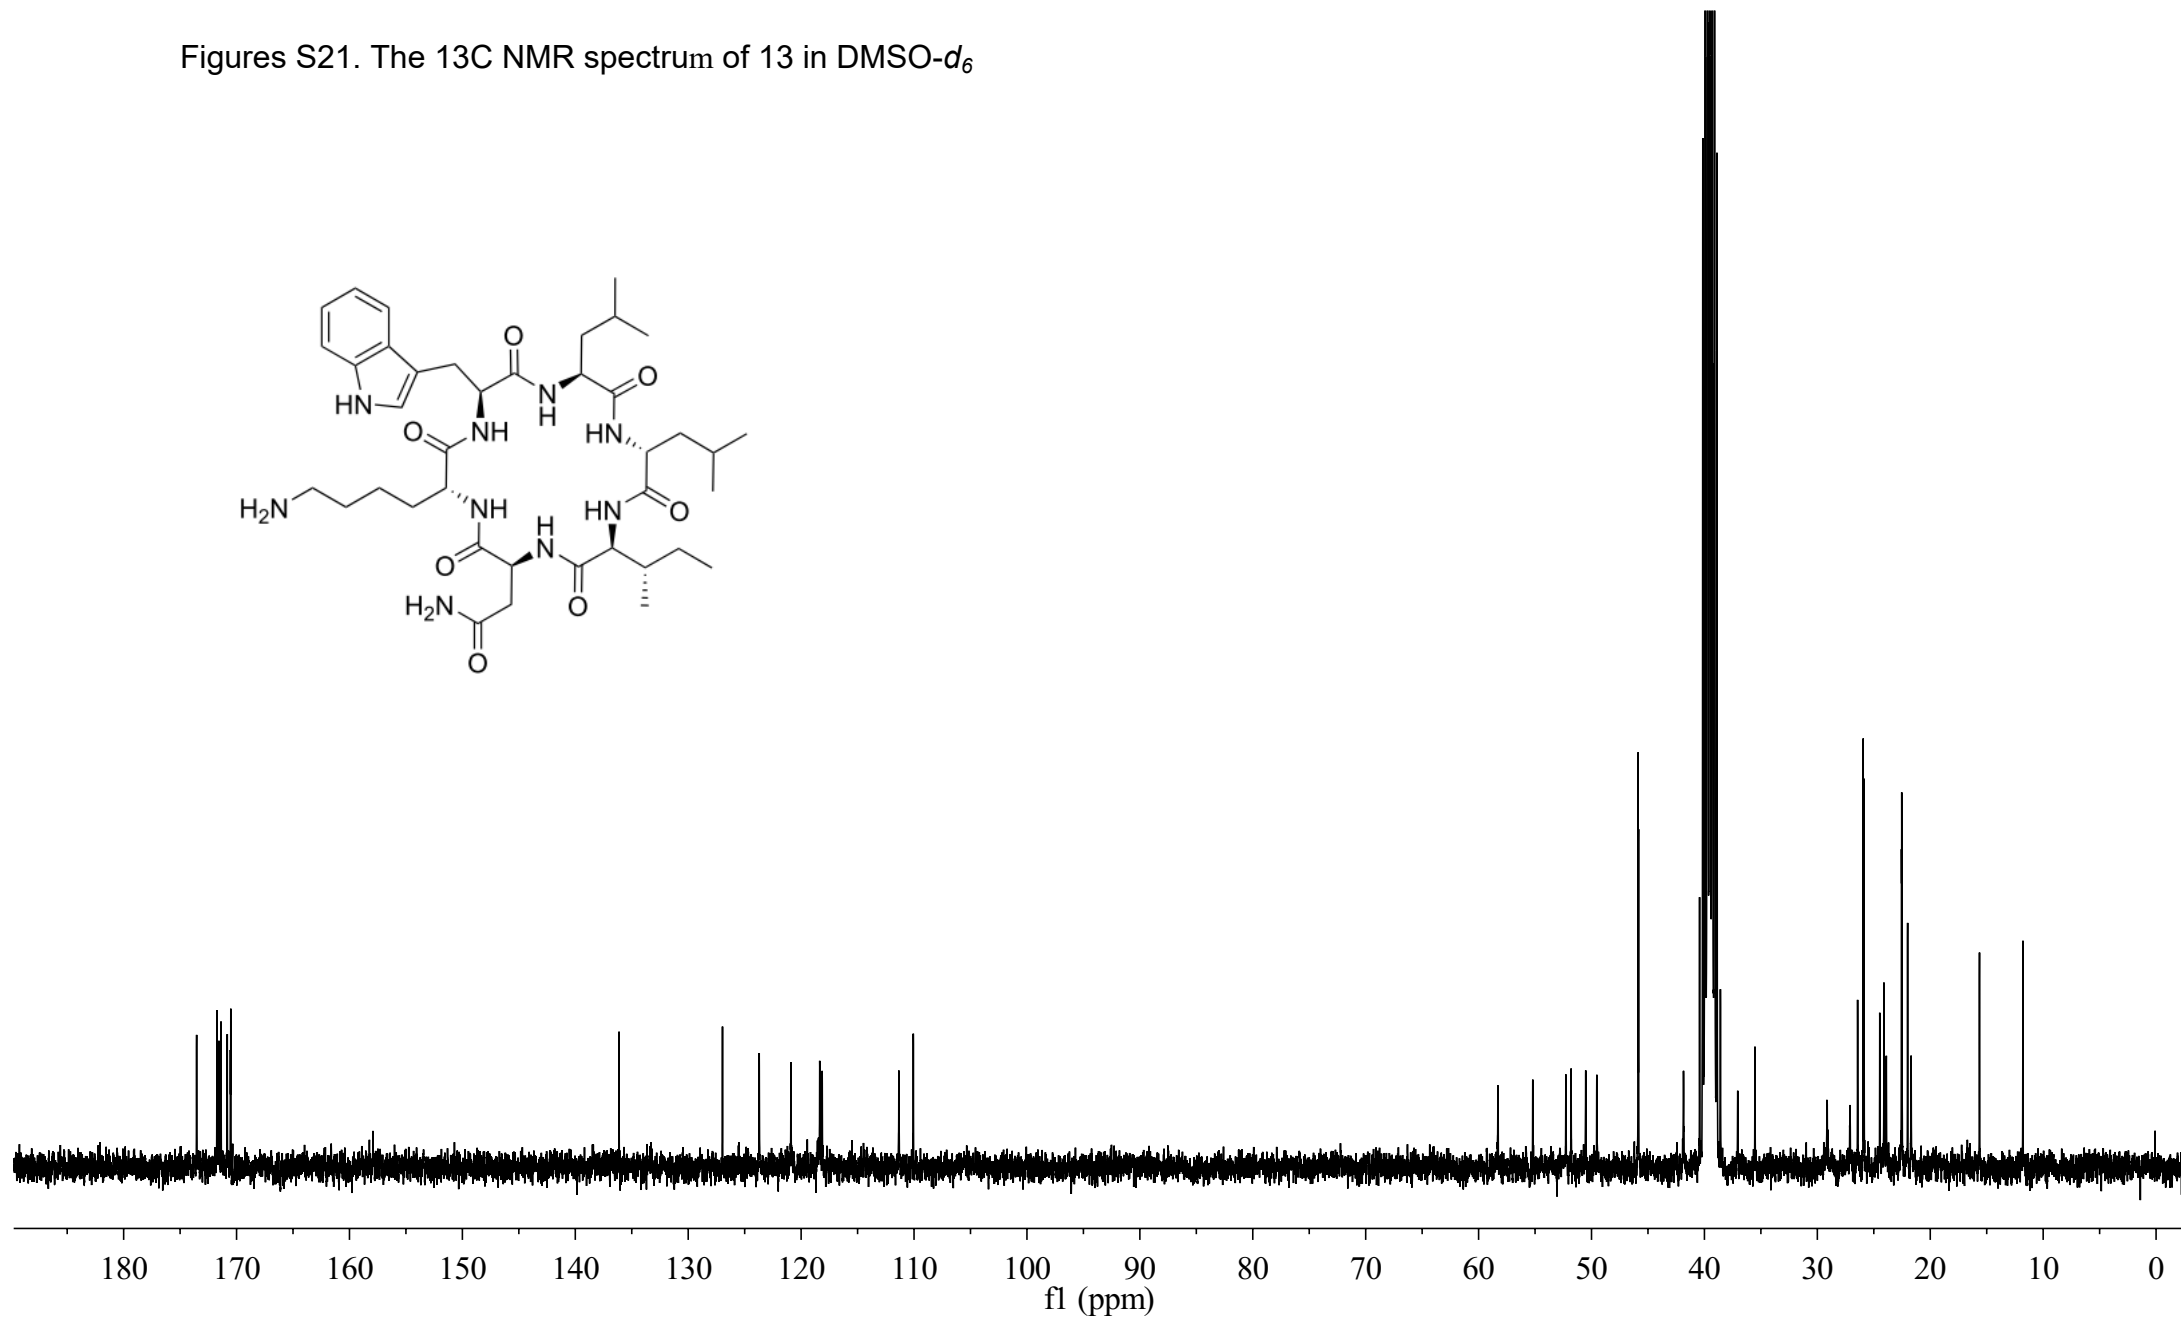

Figures S22. The HRESIMS spectrum of **14**

## Mass Spectrum SmartFormula Report

### Analysis Info

Analysis Name D:\Data\MS\data\202102\liqinglian\_A6\_pos\_56\_01\_9997.d  
 Method LC\_Direct Infusion\_pos\_100-1000mz.m  
 Sample Name liqinglian\_A6\_pos  
 Comment

Acquisition Date 2/8/2021 2:56:29 PM  
 Operator SCSIO  
 Instrument maXis 255552.00029

### Acquisition Parameter

|             |          |                      |          |                  |           |
|-------------|----------|----------------------|----------|------------------|-----------|
| Source Type | ESI      | Ion Polarity         | Positive | Set Nebulizer    | 0.4 Bar   |
| Focus       | Active   | Set Capillary        | 4500 V   | Set Dry Heater   | 180 °C    |
| Scan Begin  | 100 m/z  | Set End Plate Offset | -500 V   | Set Dry Gas      | 4.0 l/min |
| Scan End    | 2000 m/z | Set Charging Voltage | 0 V      | Set Divert Valve | Waste     |
|             |          | Set Corona           | 0 nA     | Set APCI Heater  | 0 °C      |

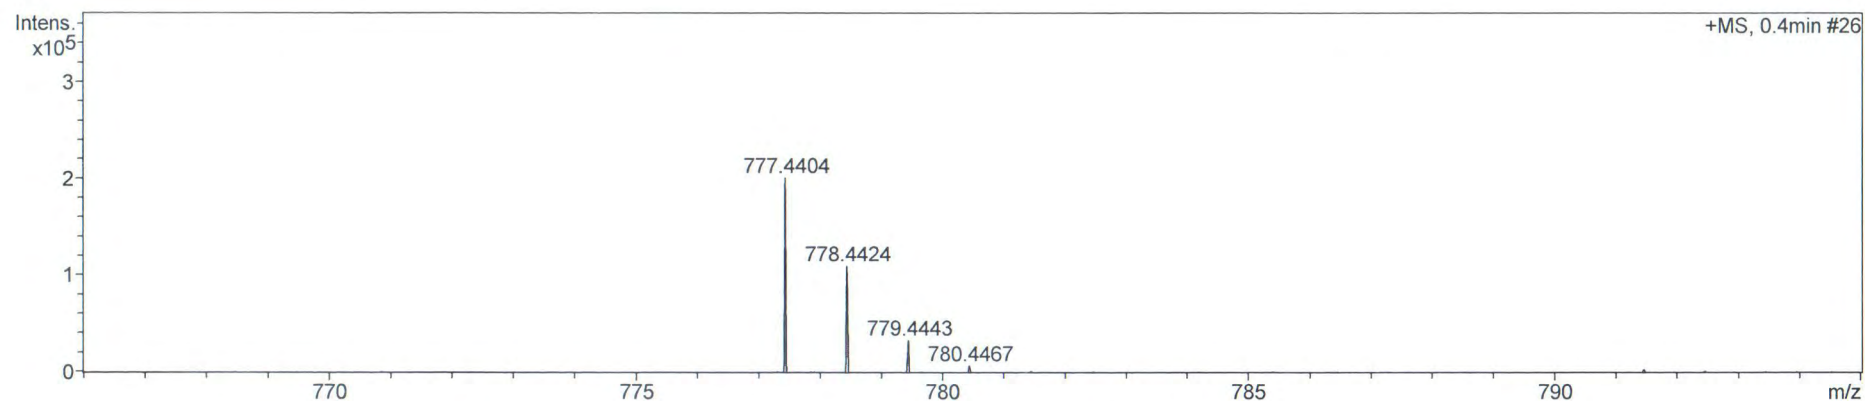

| Meas. m/z | # | Ion Formula | Score  | m/z      | err [ppm] | err [mDa] | mSigma | rdb  | e <sup>-</sup> Conf | N-Rule |
|-----------|---|-------------|--------|----------|-----------|-----------|--------|------|---------------------|--------|
| 777.4404  | 1 | C39H57N10O7 | 100.00 | 777.4406 | 0.3       | 0.2       | 45.5   | 16.5 | even                | ok     |

[illegible]



Figures S24. The  $^{13}\text{C}$  NMR spectrum of 14 in  $\text{DMSO-}d_6$

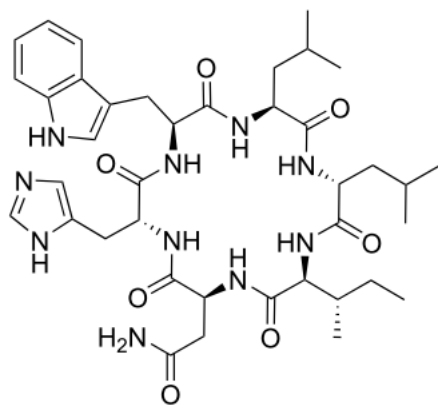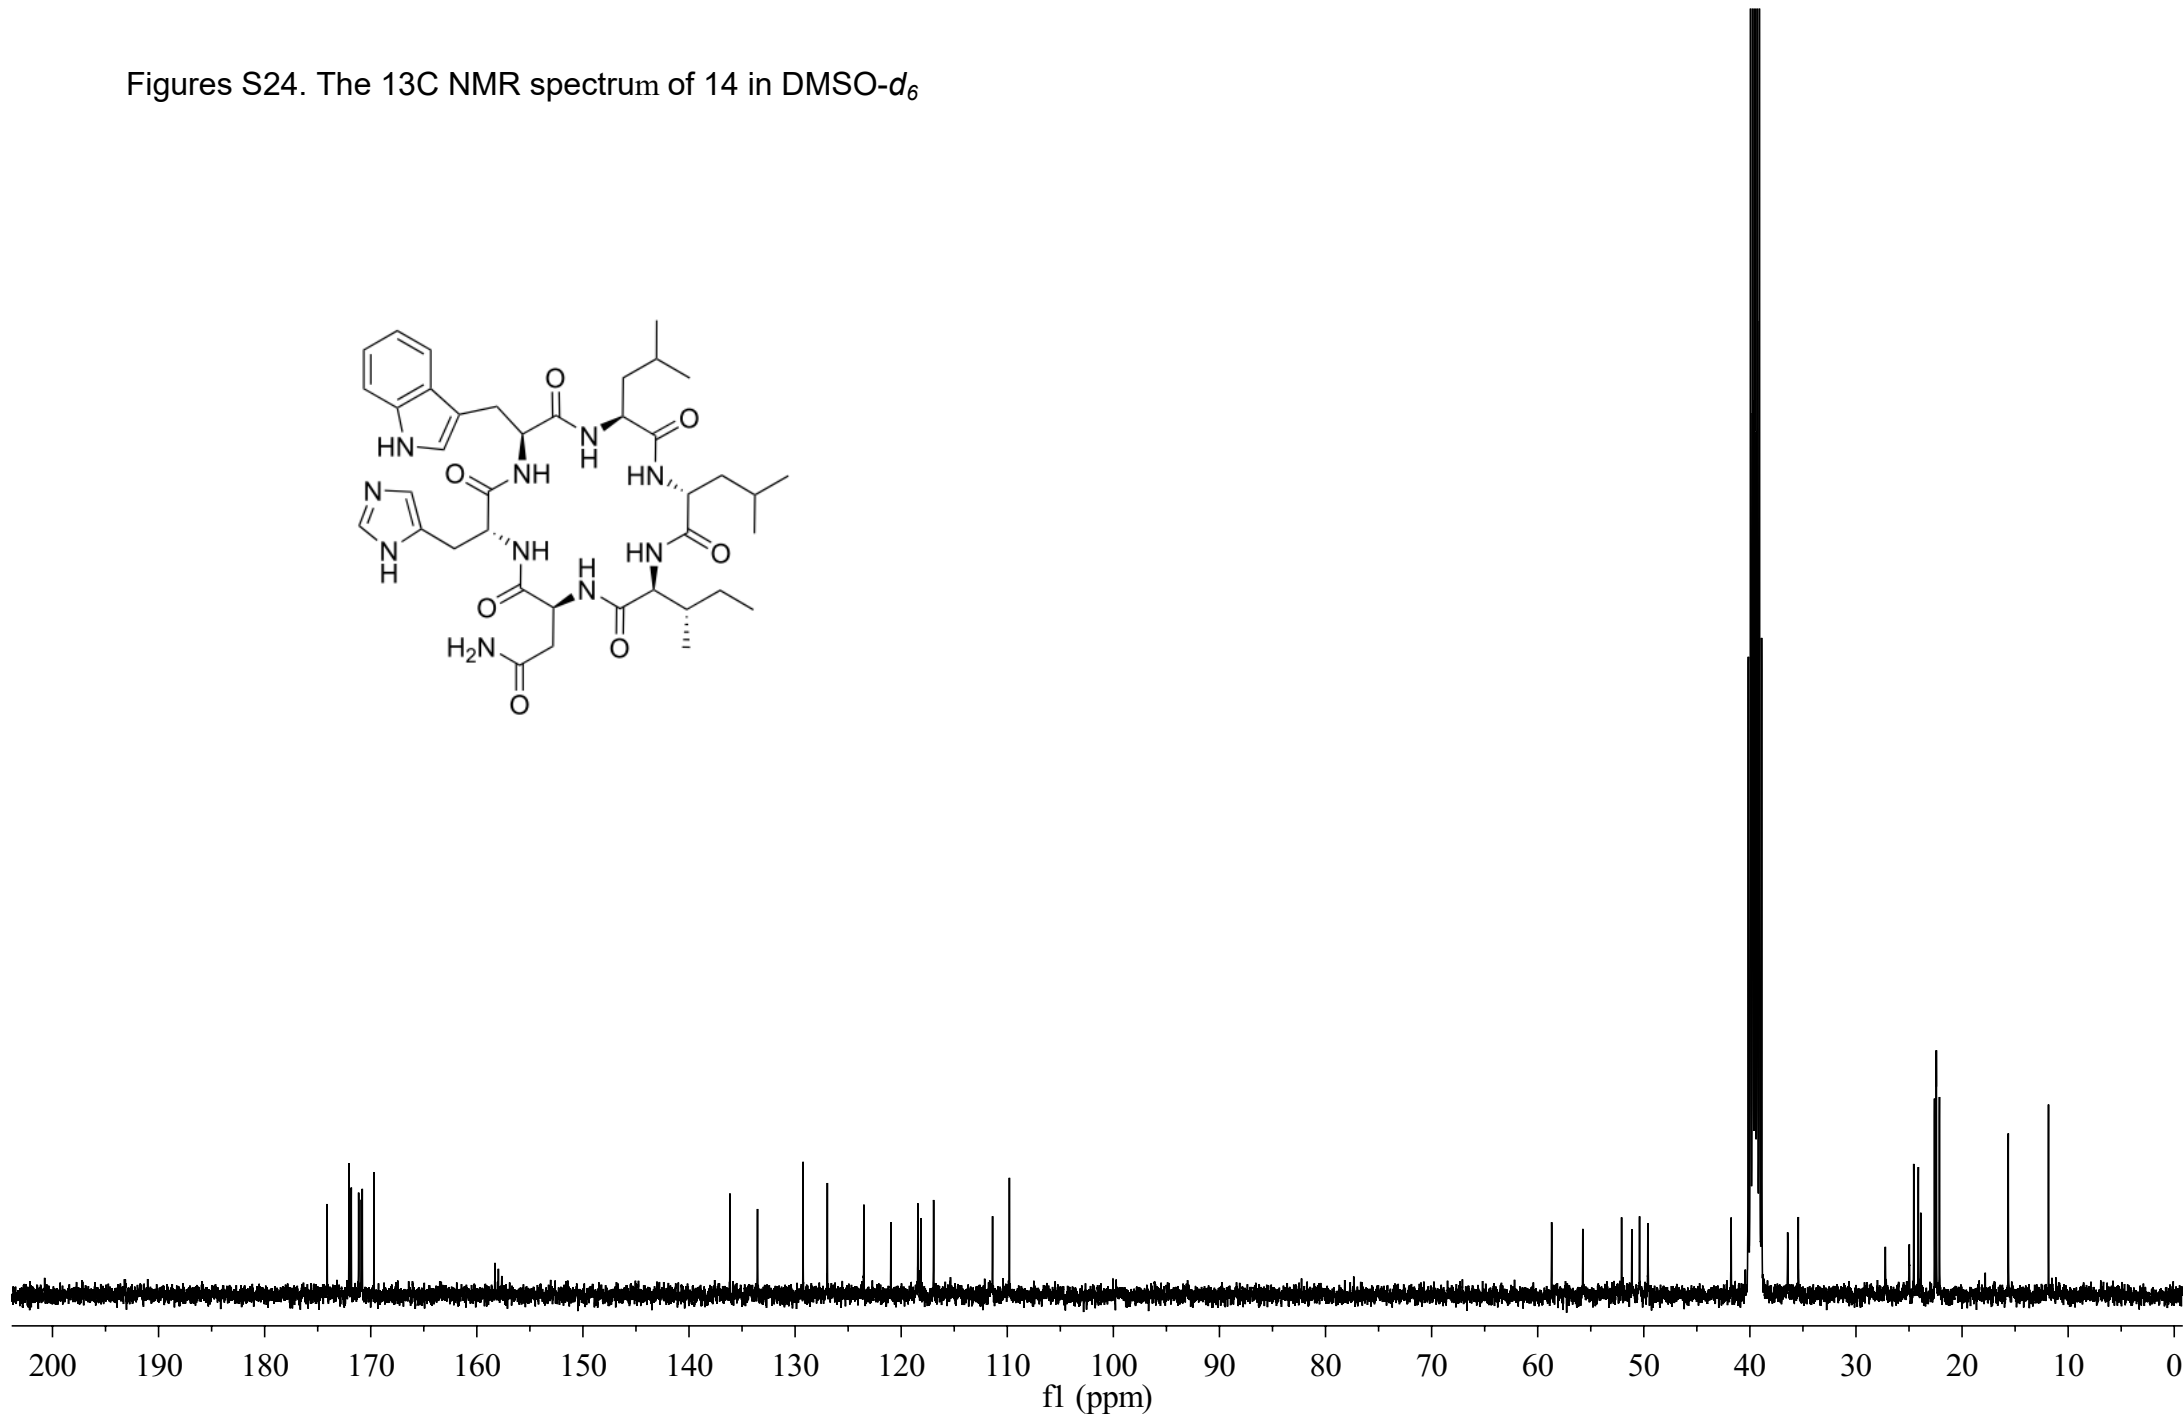

Figures S25. The HRESIMS spectrum of **15**

## Mass Spectrum SmartFormula Report

### Analysis Info

Analysis Name D:\Data\MS\data\202102\liqinglian\_A7\_pos\_57\_01\_9998.d  
 Method LC\_Direct Infusion\_pos\_100-1000mz.m  
 Sample Name liqinglian\_A7\_pos  
 Comment

Acquisition Date 2/8/2021 2:59:58 PM  
 Operator SCSIO  
 Instrument maXis 255552.00029

### Acquisition Parameter

|             |          |                      |          |                  |           |
|-------------|----------|----------------------|----------|------------------|-----------|
| Source Type | ESI      | Ion Polarity         | Positive | Set Nebulizer    | 0.4 Bar   |
| Focus       | Active   | Set Capillary        | 4500 V   | Set Dry Heater   | 180 °C    |
| Scan Begin  | 100 m/z  | Set End Plate Offset | -500 V   | Set Dry Gas      | 4.0 l/min |
| Scan End    | 2000 m/z | Set Charging Voltage | 0 V      | Set Divert Valve | Waste     |
|             |          | Set Corona           | 0 nA     | Set APCI Heater  | 0 °C      |

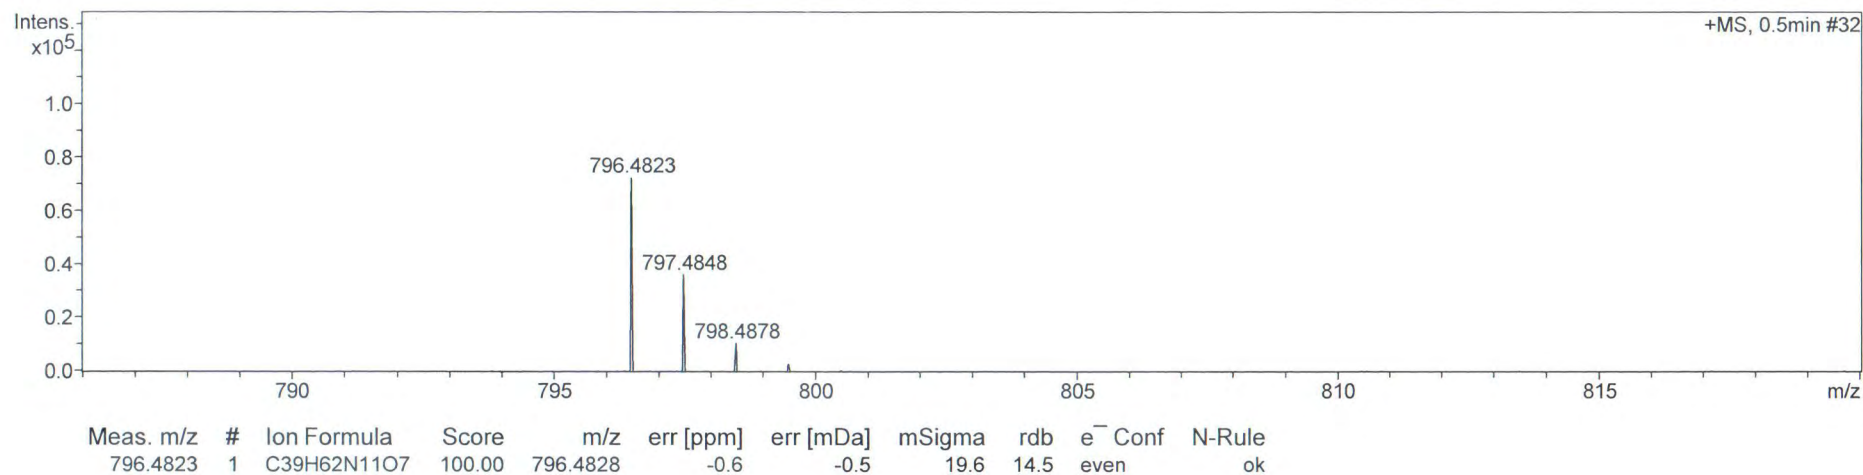

[illegible]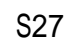

Figures S27. The  $^{13}\text{C}$  NMR spectrum of 15 in  $\text{DMSO}-d_6$

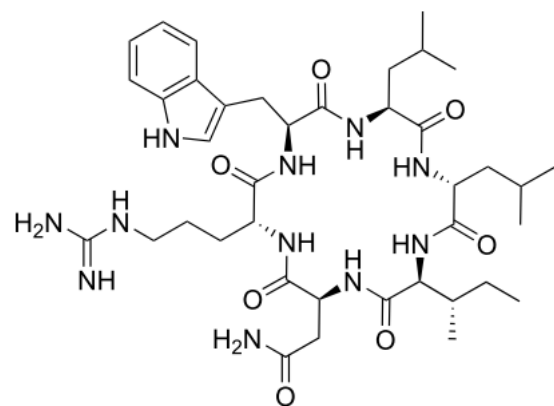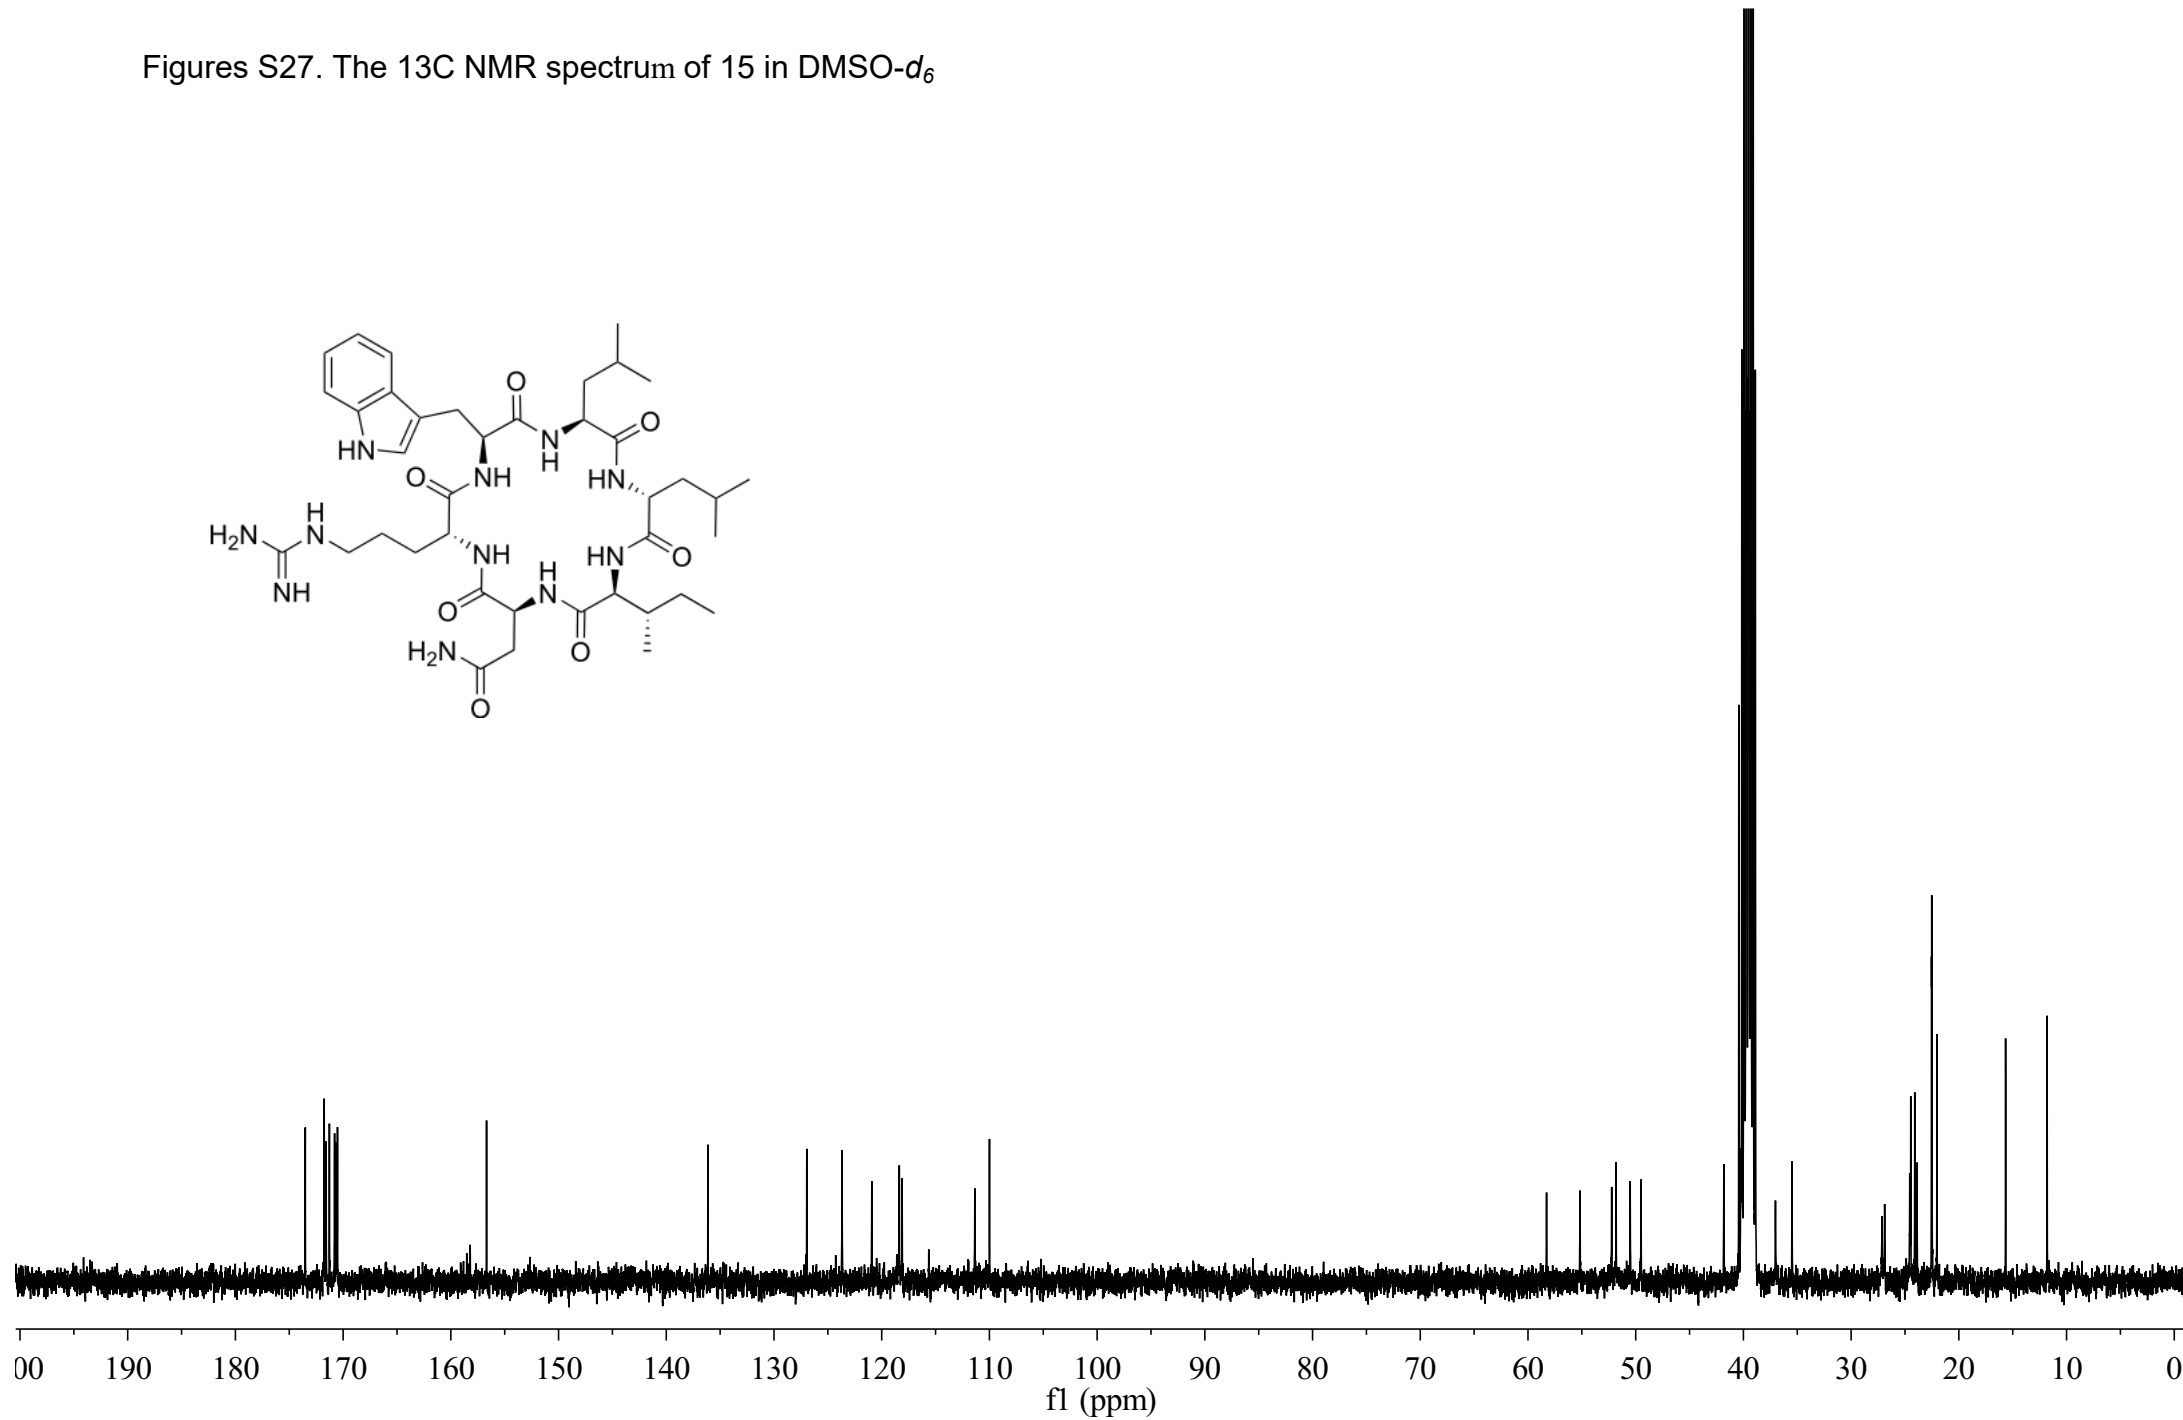

Figures S28. The HRESIMS spectrum of **16**

## Mass Spectrum SmartFormula Report

### Analysis Info

Analysis Name D:\Data\MS\data\202102\liqinglian\_A8\_pos\_58\_01\_9999.d  
 Method LC\_Direct Infusion\_pos\_100-1000mz.m  
 Sample Name liqinglian\_A8\_pos  
 Comment

Acquisition Date 2/8/2021 3:03:27 PM  
 Operator SCSIO  
 Instrument maXis 255552.00029

### Acquisition Parameter

|             |          |                      |          |                  |           |
|-------------|----------|----------------------|----------|------------------|-----------|
| Source Type | ESI      | Ion Polarity         | Positive | Set Nebulizer    | 0.4 Bar   |
| Focus       | Active   | Set Capillary        | 4500 V   | Set Dry Heater   | 180 °C    |
| Scan Begin  | 100 m/z  | Set End Plate Offset | -500 V   | Set Dry Gas      | 4.0 l/min |
| Scan End    | 2000 m/z | Set Charging Voltage | 0 V      | Set Divert Valve | Waste     |
|             |          | Set Corona           | 0 nA     | Set APCI Heater  | 0 °C      |

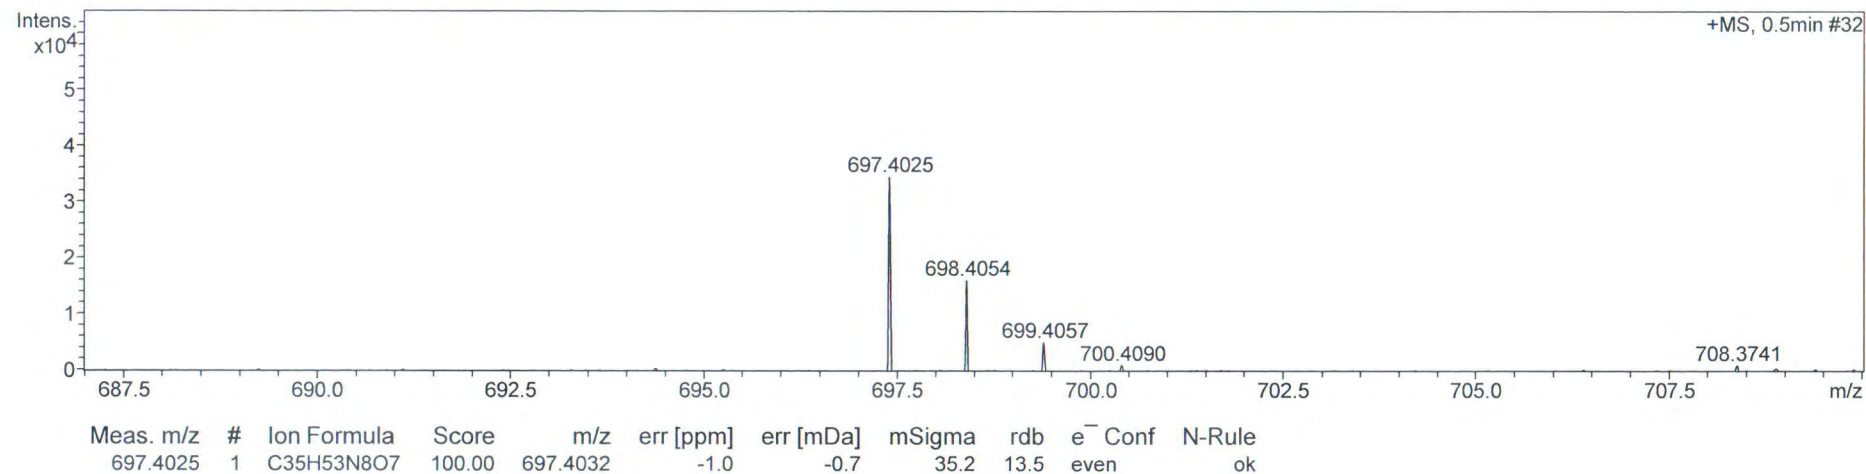

C[C@H](C)CC(=O)N[C@@H](Cc1c[nH]c2ccccc12)C(=O)NC(=O)[C@H](C)CC(C)C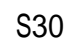

Figures S30. The  $^{13}\text{C}$  NMR spectrum of 16 in  $\text{DMSO-}d_6$

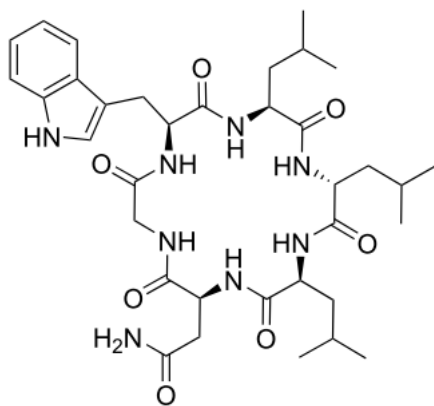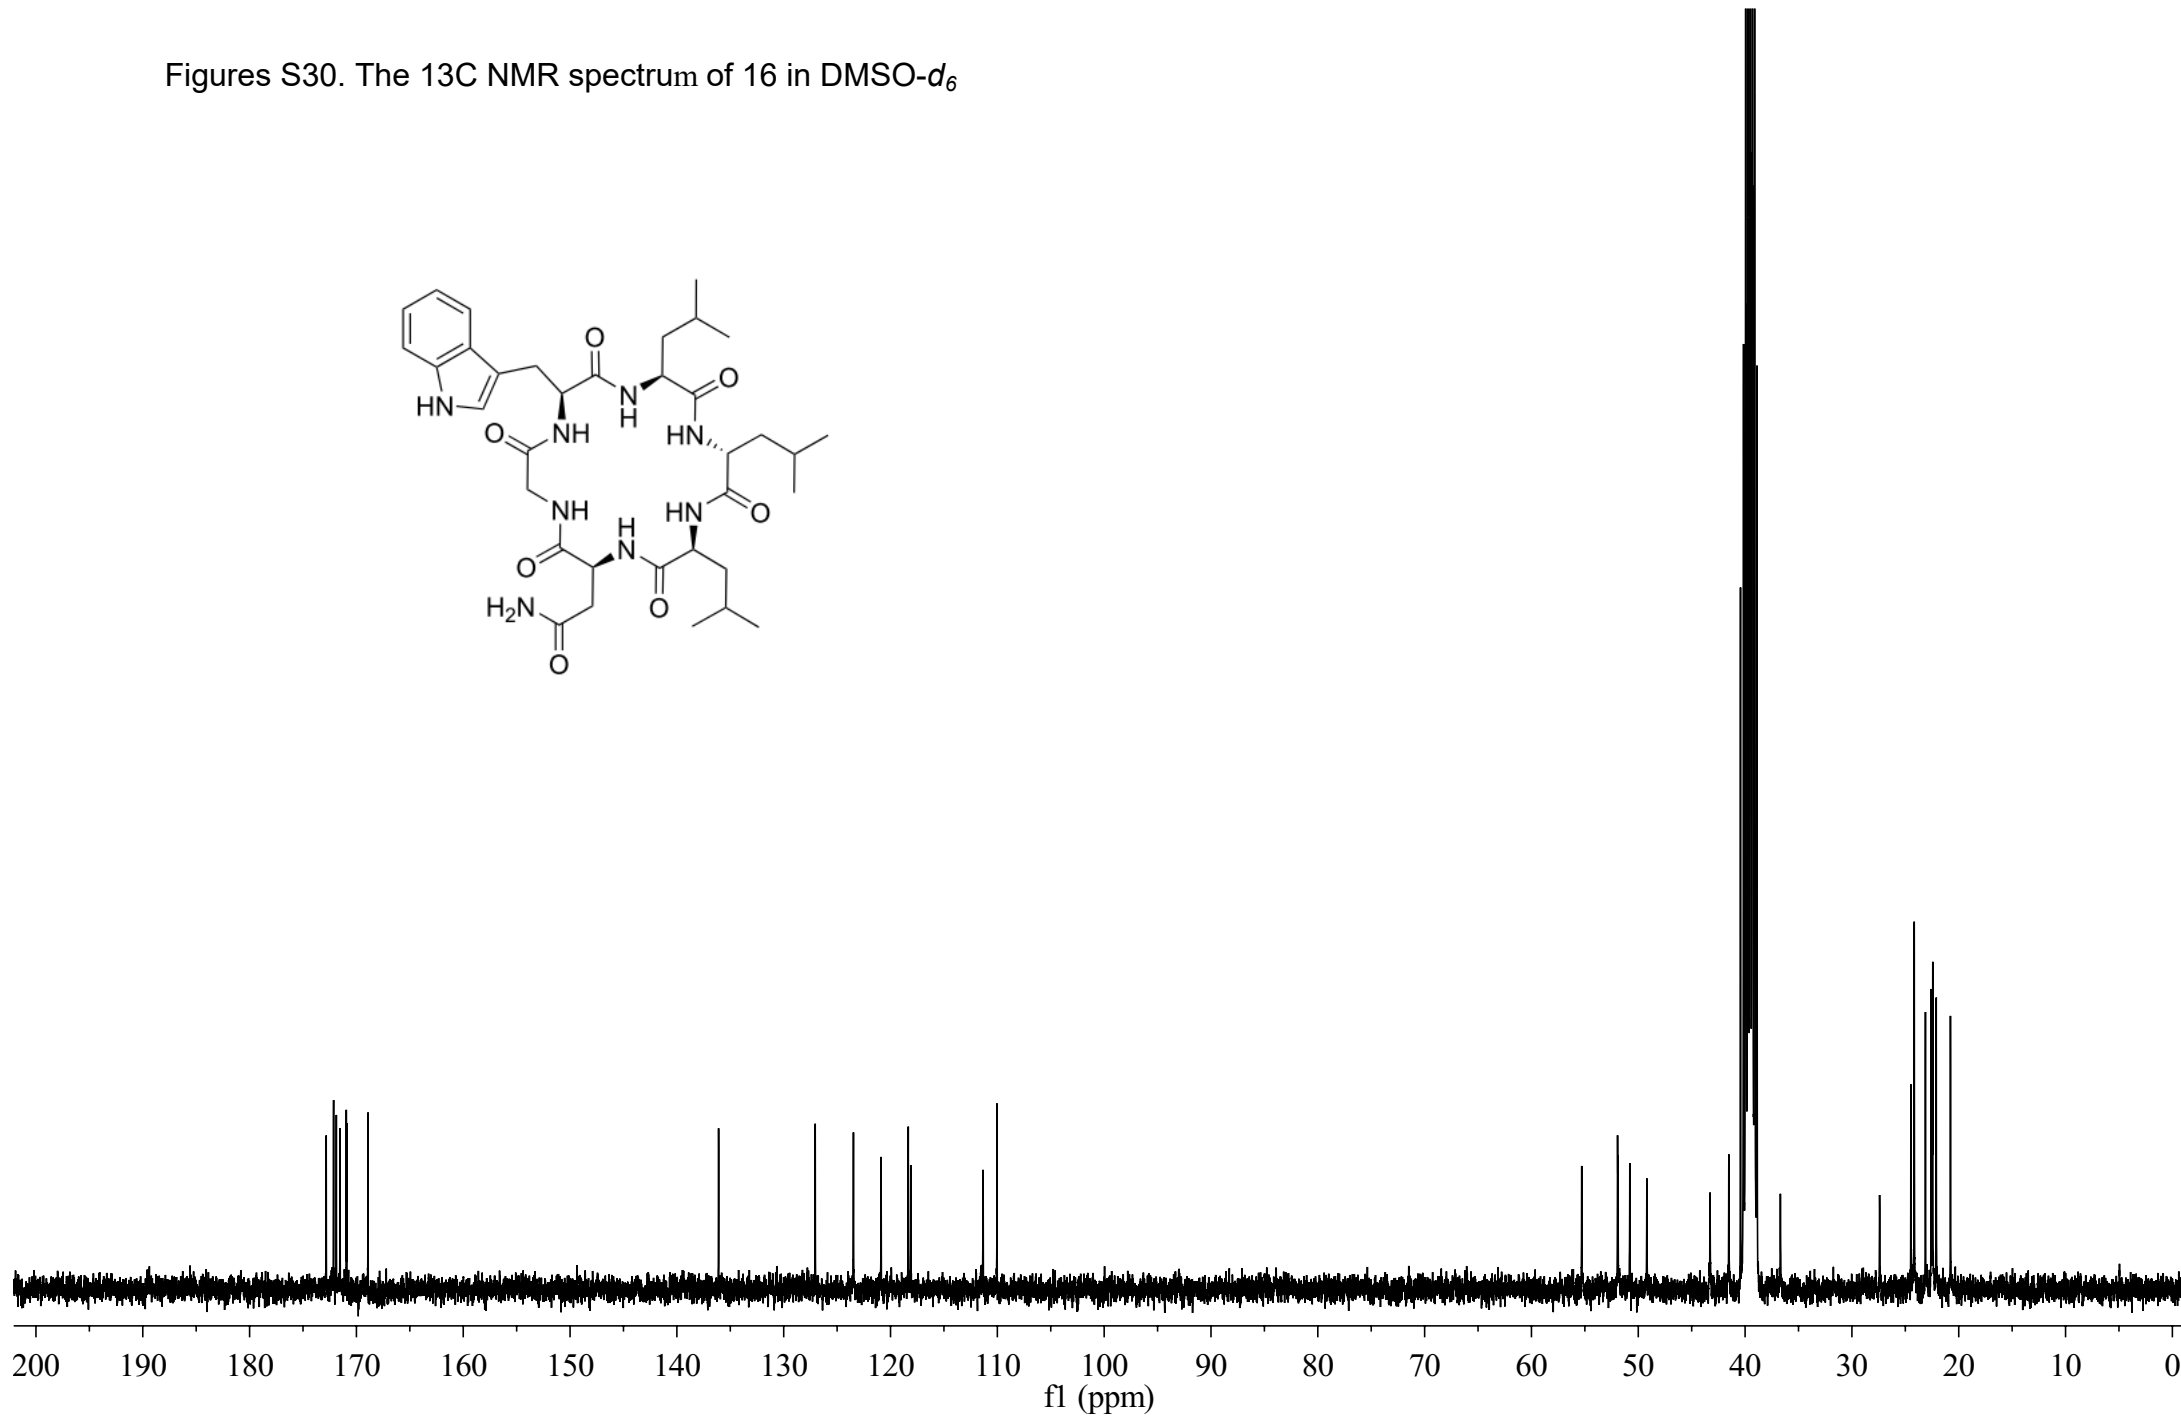

Figures S31. The HRESIMS spectrum of **17**

## Mass Spectrum SmartFormula Report

### Analysis Info

Analysis Name D:\Data\MS\data\202102\liqinglian\_A9\_pos\_59\_01\_10000.d  
 Method LC\_Direct Infusion\_pos\_100-1000mz.m  
 Sample Name liqinglian\_A9\_pos  
 Comment

Acquisition Date 2/8/2021 3:06:57 PM  
 Operator SCSIO  
 Instrument maXis 255552.00029

### Acquisition Parameter

|             |          |                      |          |                  |           |
|-------------|----------|----------------------|----------|------------------|-----------|
| Source Type | ESI      | Ion Polarity         | Positive | Set Nebulizer    | 0.4 Bar   |
| Focus       | Active   | Set Capillary        | 4500 V   | Set Dry Heater   | 180 °C    |
| Scan Begin  | 100 m/z  | Set End Plate Offset | -500 V   | Set Dry Gas      | 4.0 l/min |
| Scan End    | 2000 m/z | Set Charging Voltage | 0 V      | Set Divert Valve | Waste     |
|             |          | Set Corona           | 0 nA     | Set APCI Heater  | 0 °C      |

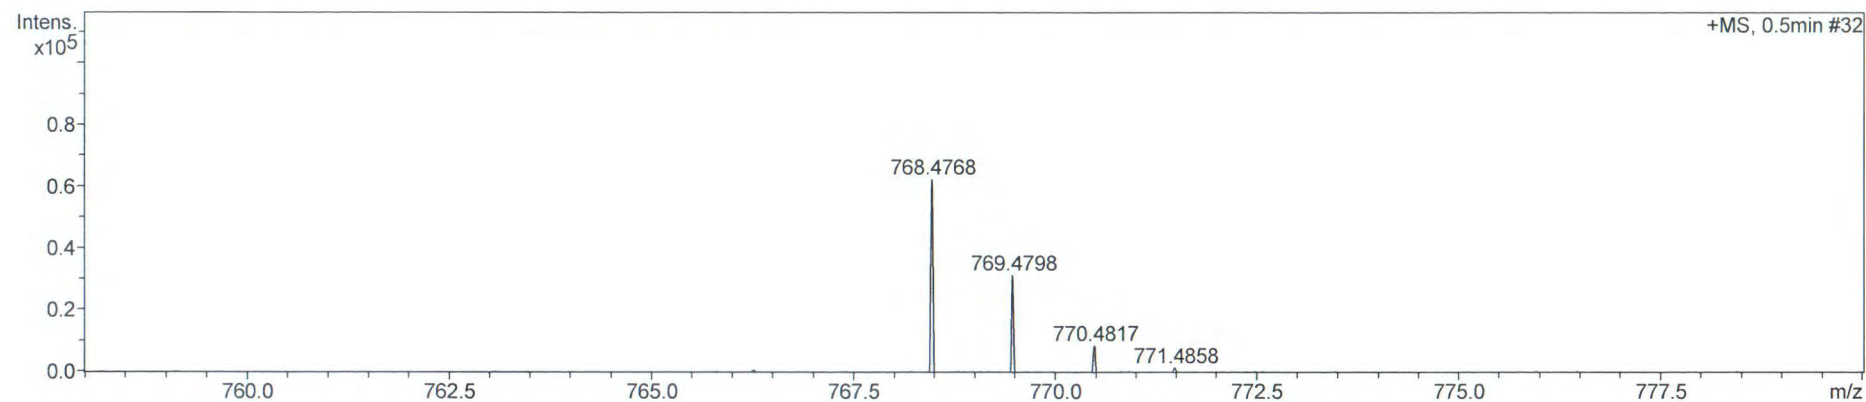

| Meas. m/z | # | Ion Formula | Score  | m/z      | err [ppm] | err [mDa] | mSigma | rdB  | e <sup>-</sup> Conf | N-Rule |
|-----------|---|-------------|--------|----------|-----------|-----------|--------|------|---------------------|--------|
| 768.4768  | 1 | C39H62N9O7  | 100.00 | 768.4767 | 0.1       | 0.1       | 20.2   | 13.5 | even                | ok     |



Figures S32. The  $^1\text{H}$  NMR spectrum of 17 in  $\text{DMSO-}d_6$

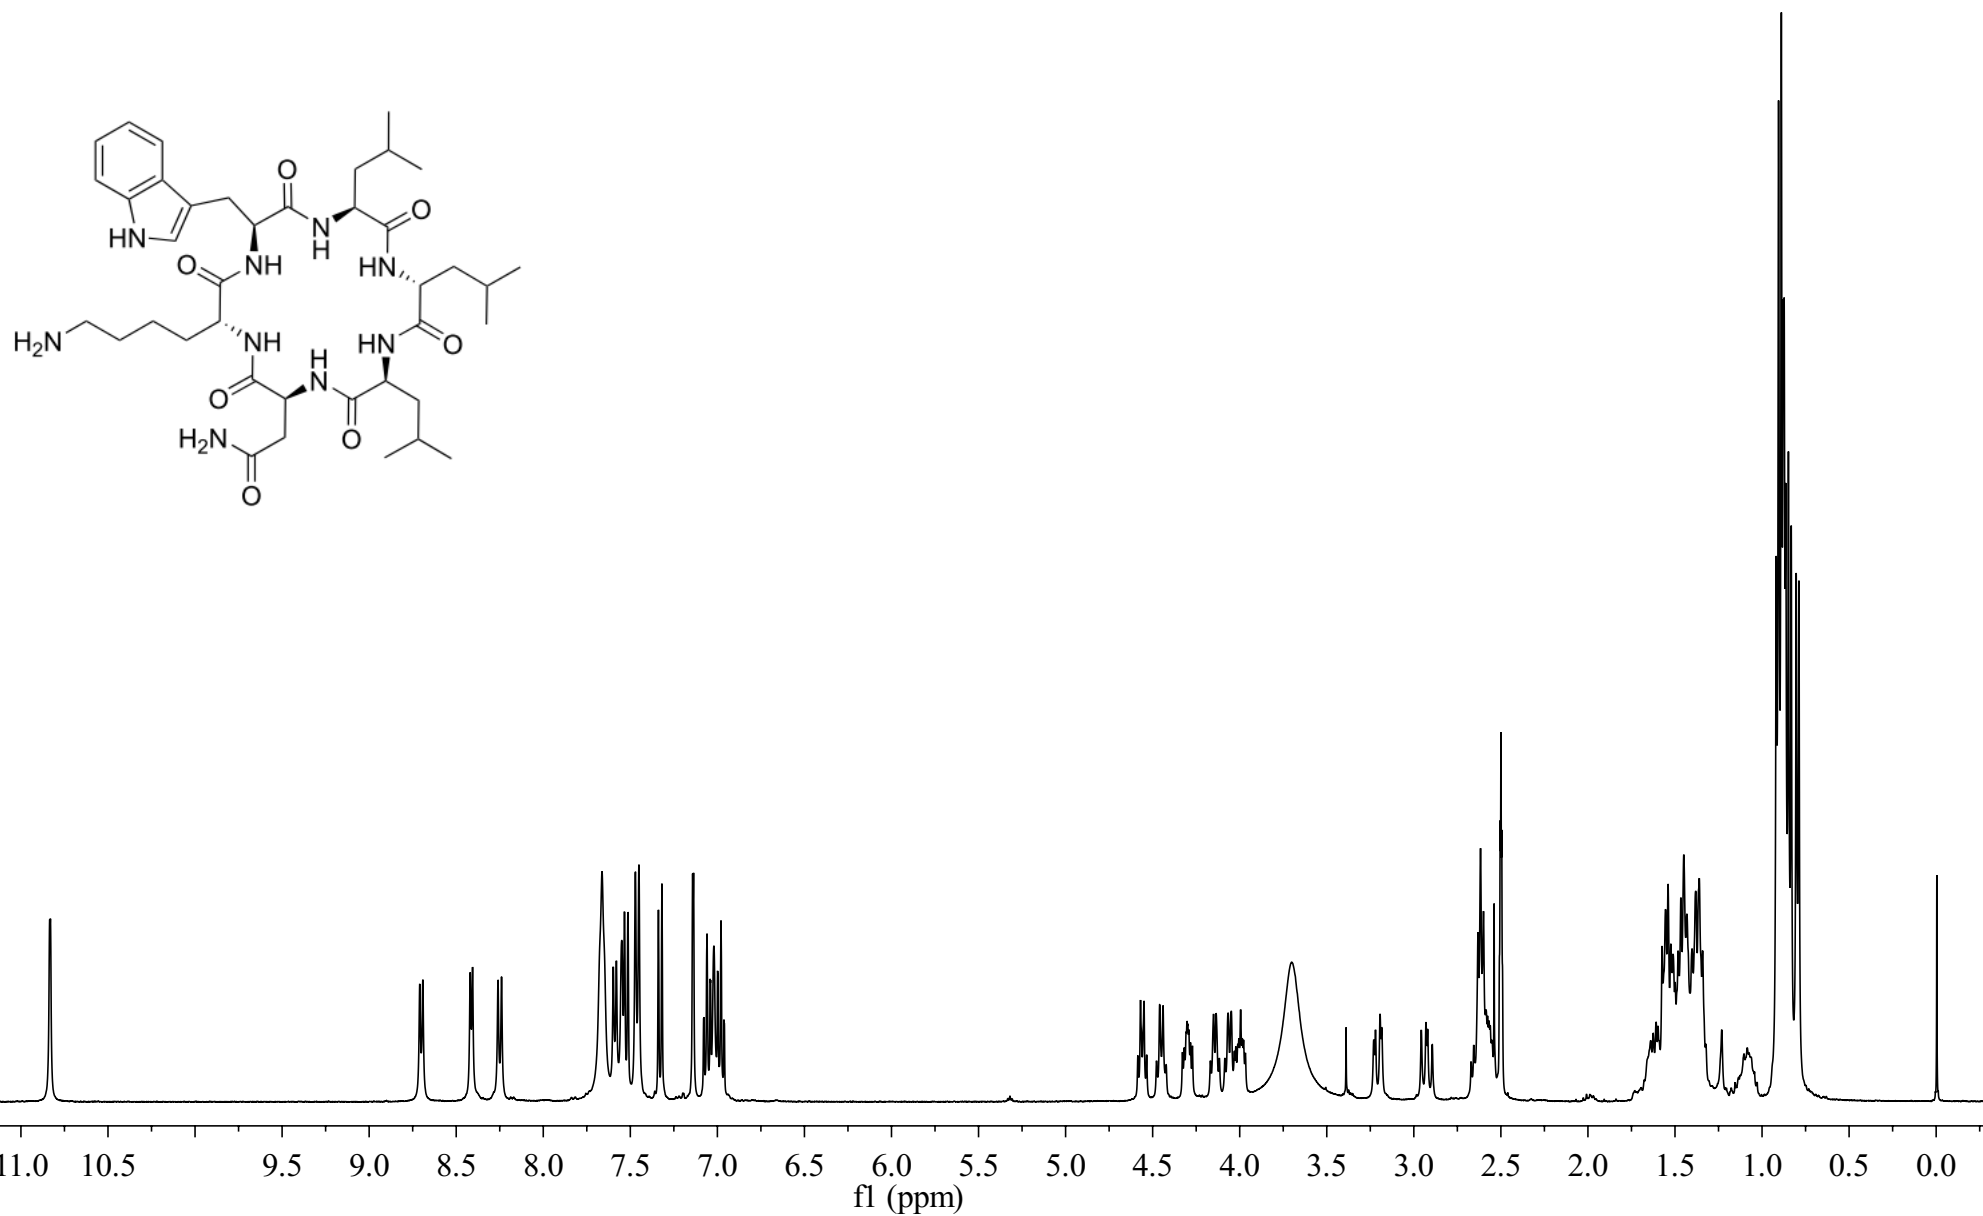

Figures S33. The  $^{13}\text{C}$  NMR spectrum of 17 in  $\text{DMSO}-d_6$

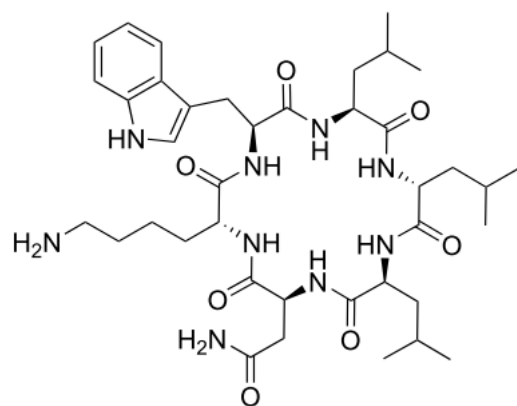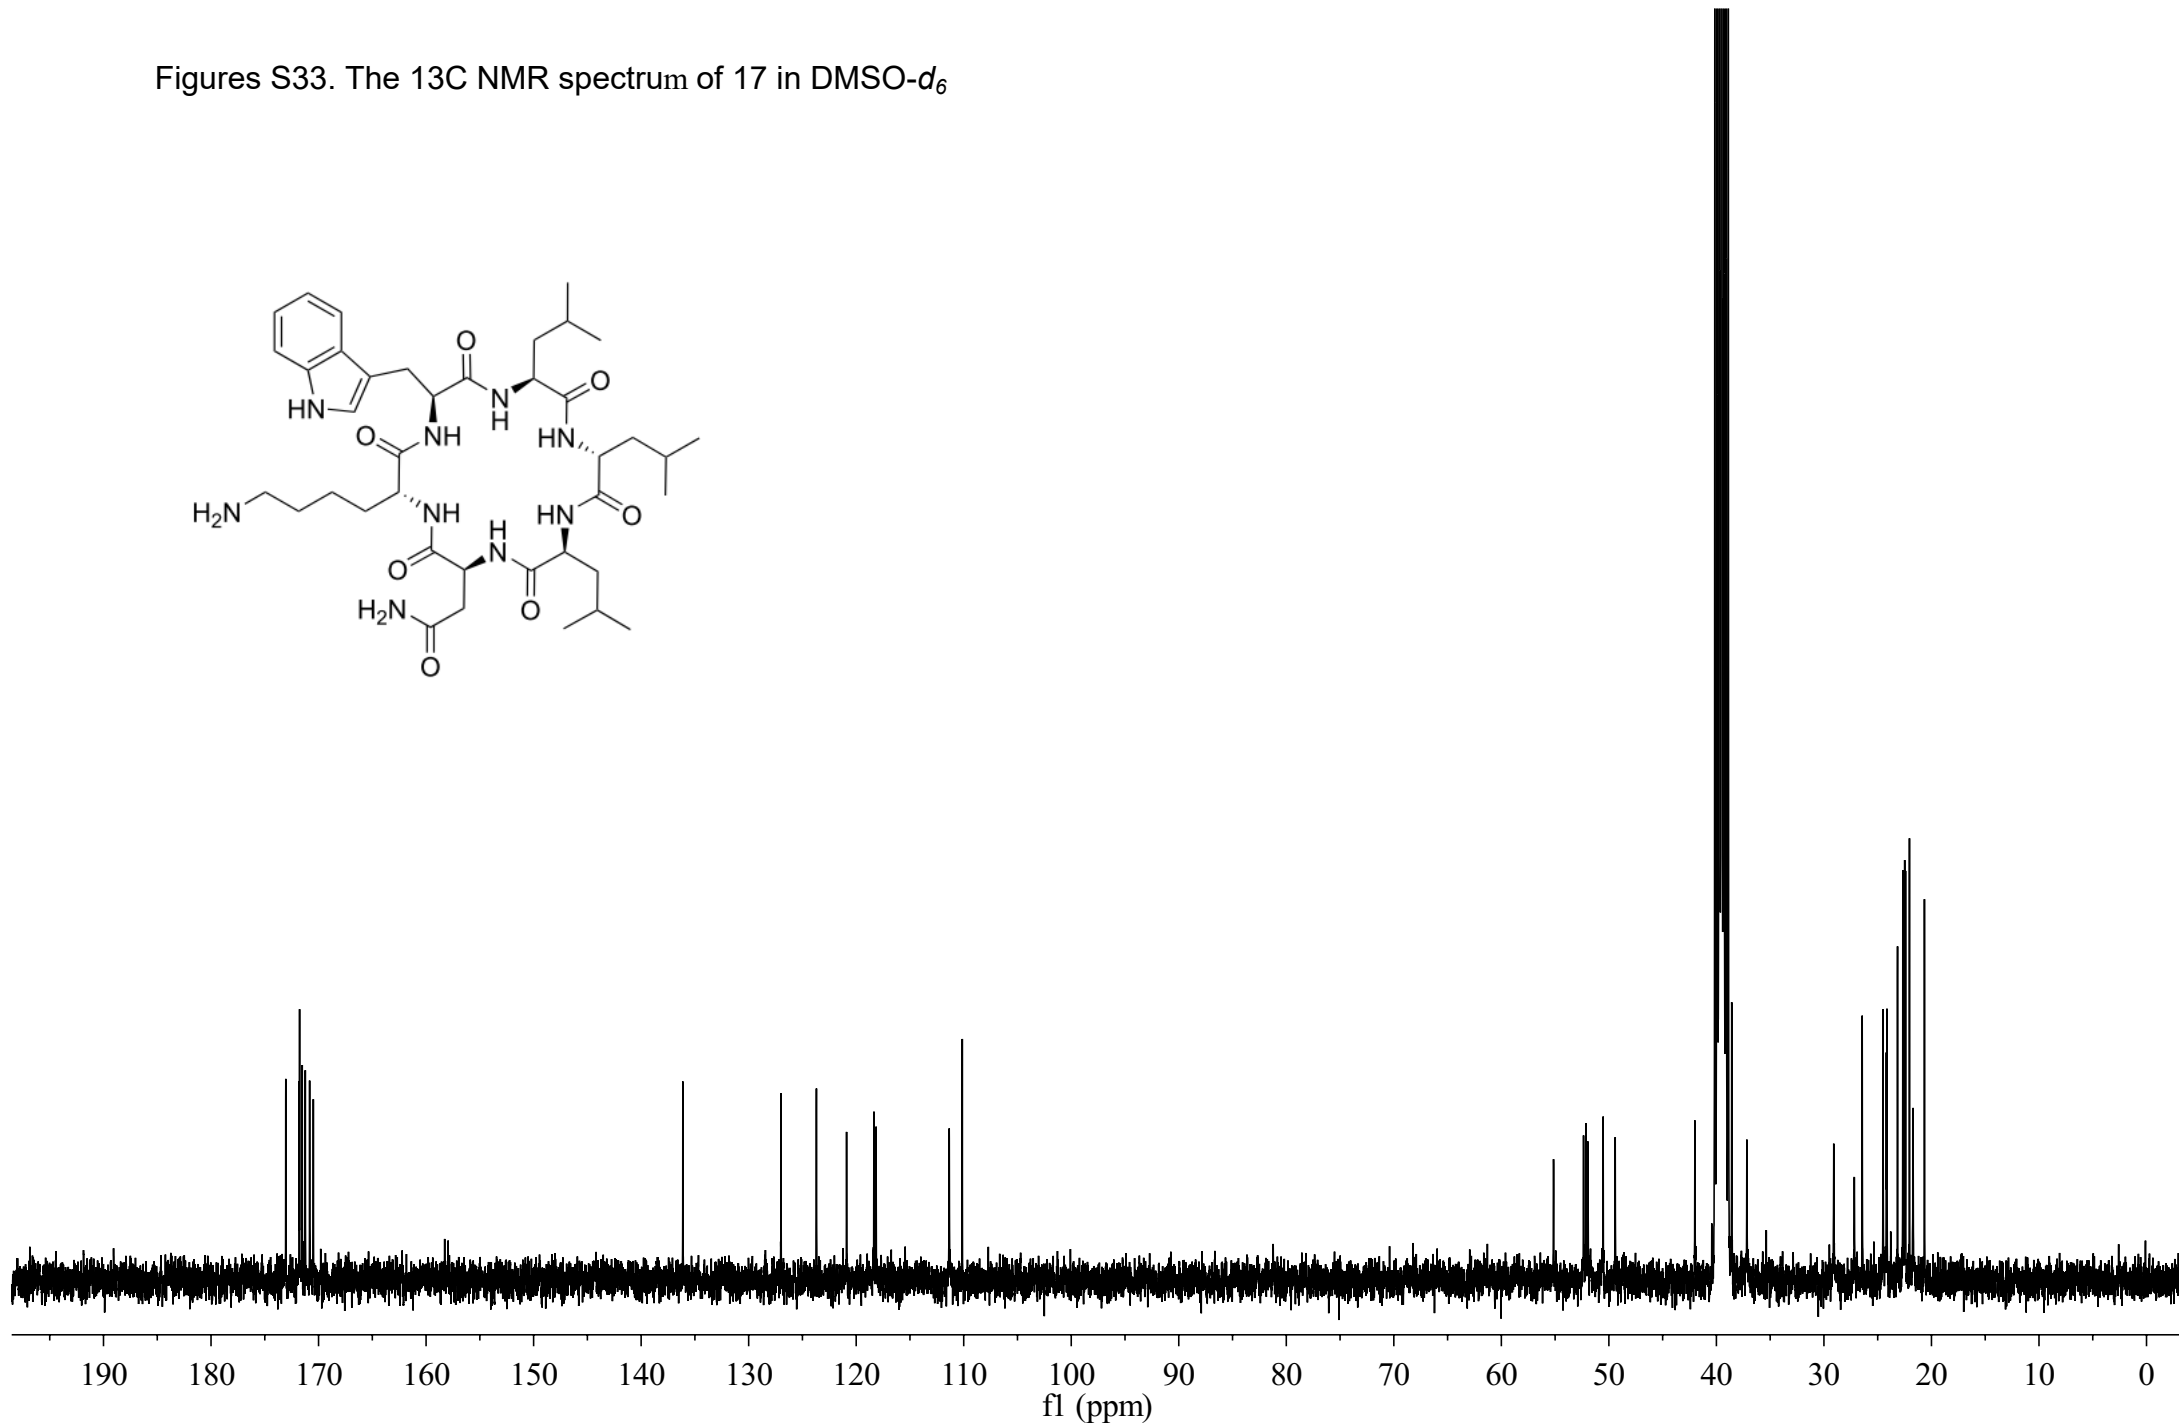

Figures S34. The HRESIMS spectrum of **18**

## Mass Spectrum SmartFormula Report

### Analysis Info

Analysis Name D:\Data\MS\data\202102\liqinglian\_A10\_pos\_60\_01\_10001.d  
 Method LC\_Direct Infusion\_pos\_100-1000mz.m  
 Sample Name liqinglian\_A10\_pos  
 Comment

Acquisition Date 2/8/2021 3:10:24 PM  
 Operator SCSIO  
 Instrument maXis 255552.00029

### Acquisition Parameter

|             |          |                      |          |                  |           |
|-------------|----------|----------------------|----------|------------------|-----------|
| Source Type | ESI      | Ion Polarity         | Positive | Set Nebulizer    | 0.4 Bar   |
| Focus       | Active   | Set Capillary        | 4500 V   | Set Dry Heater   | 180 °C    |
| Scan Begin  | 100 m/z  | Set End Plate Offset | -500 V   | Set Dry Gas      | 4.0 l/min |
| Scan End    | 2000 m/z | Set Charging Voltage | 0 V      | Set Divert Valve | Waste     |
|             |          | Set Corona           | 0 nA     | Set APCI Heater  | 0 °C      |

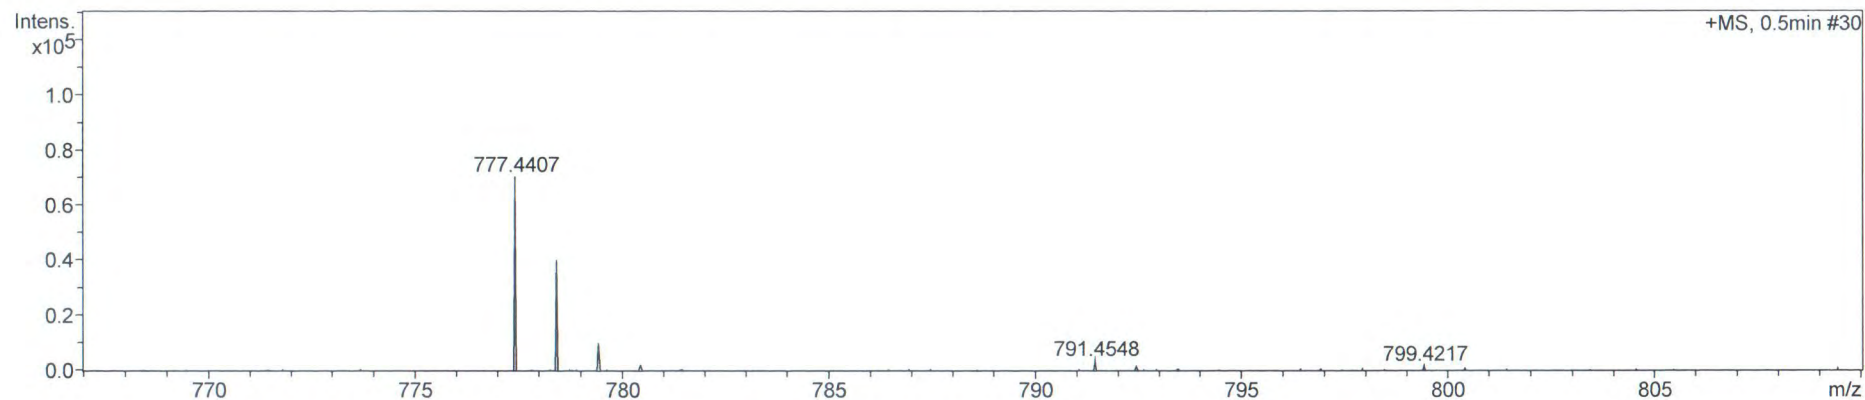

| Meas. m/z | # | Ion Formula   | Score  | m/z      | err [ppm] | err [mDa] | mSigma | rdb  | e <sup>-</sup> Conf | N-Rule |
|-----------|---|---------------|--------|----------|-----------|-----------|--------|------|---------------------|--------|
| 777.4407  | 1 | C39H57N10O7   | 100.00 | 777.4406 | -0.1      | -0.1      | 53.4   | 16.5 | even                | ok     |
| 799.4217  | 1 | C39H56N10NaO7 | 100.00 | 799.4226 | 1.1       | 0.8       | 40.7   | 16.5 | even                | ok     |

[illegible]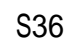

Figures S36. The  $^{13}\text{C}$  NMR spectrum of 18 in  $\text{DMSO-}d_6$

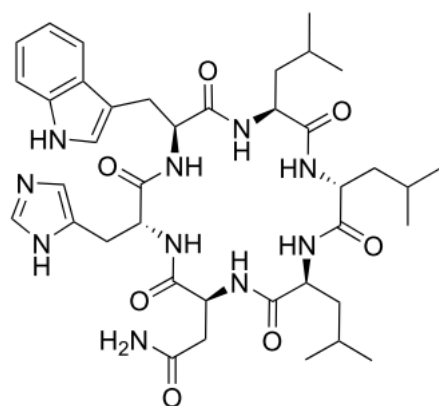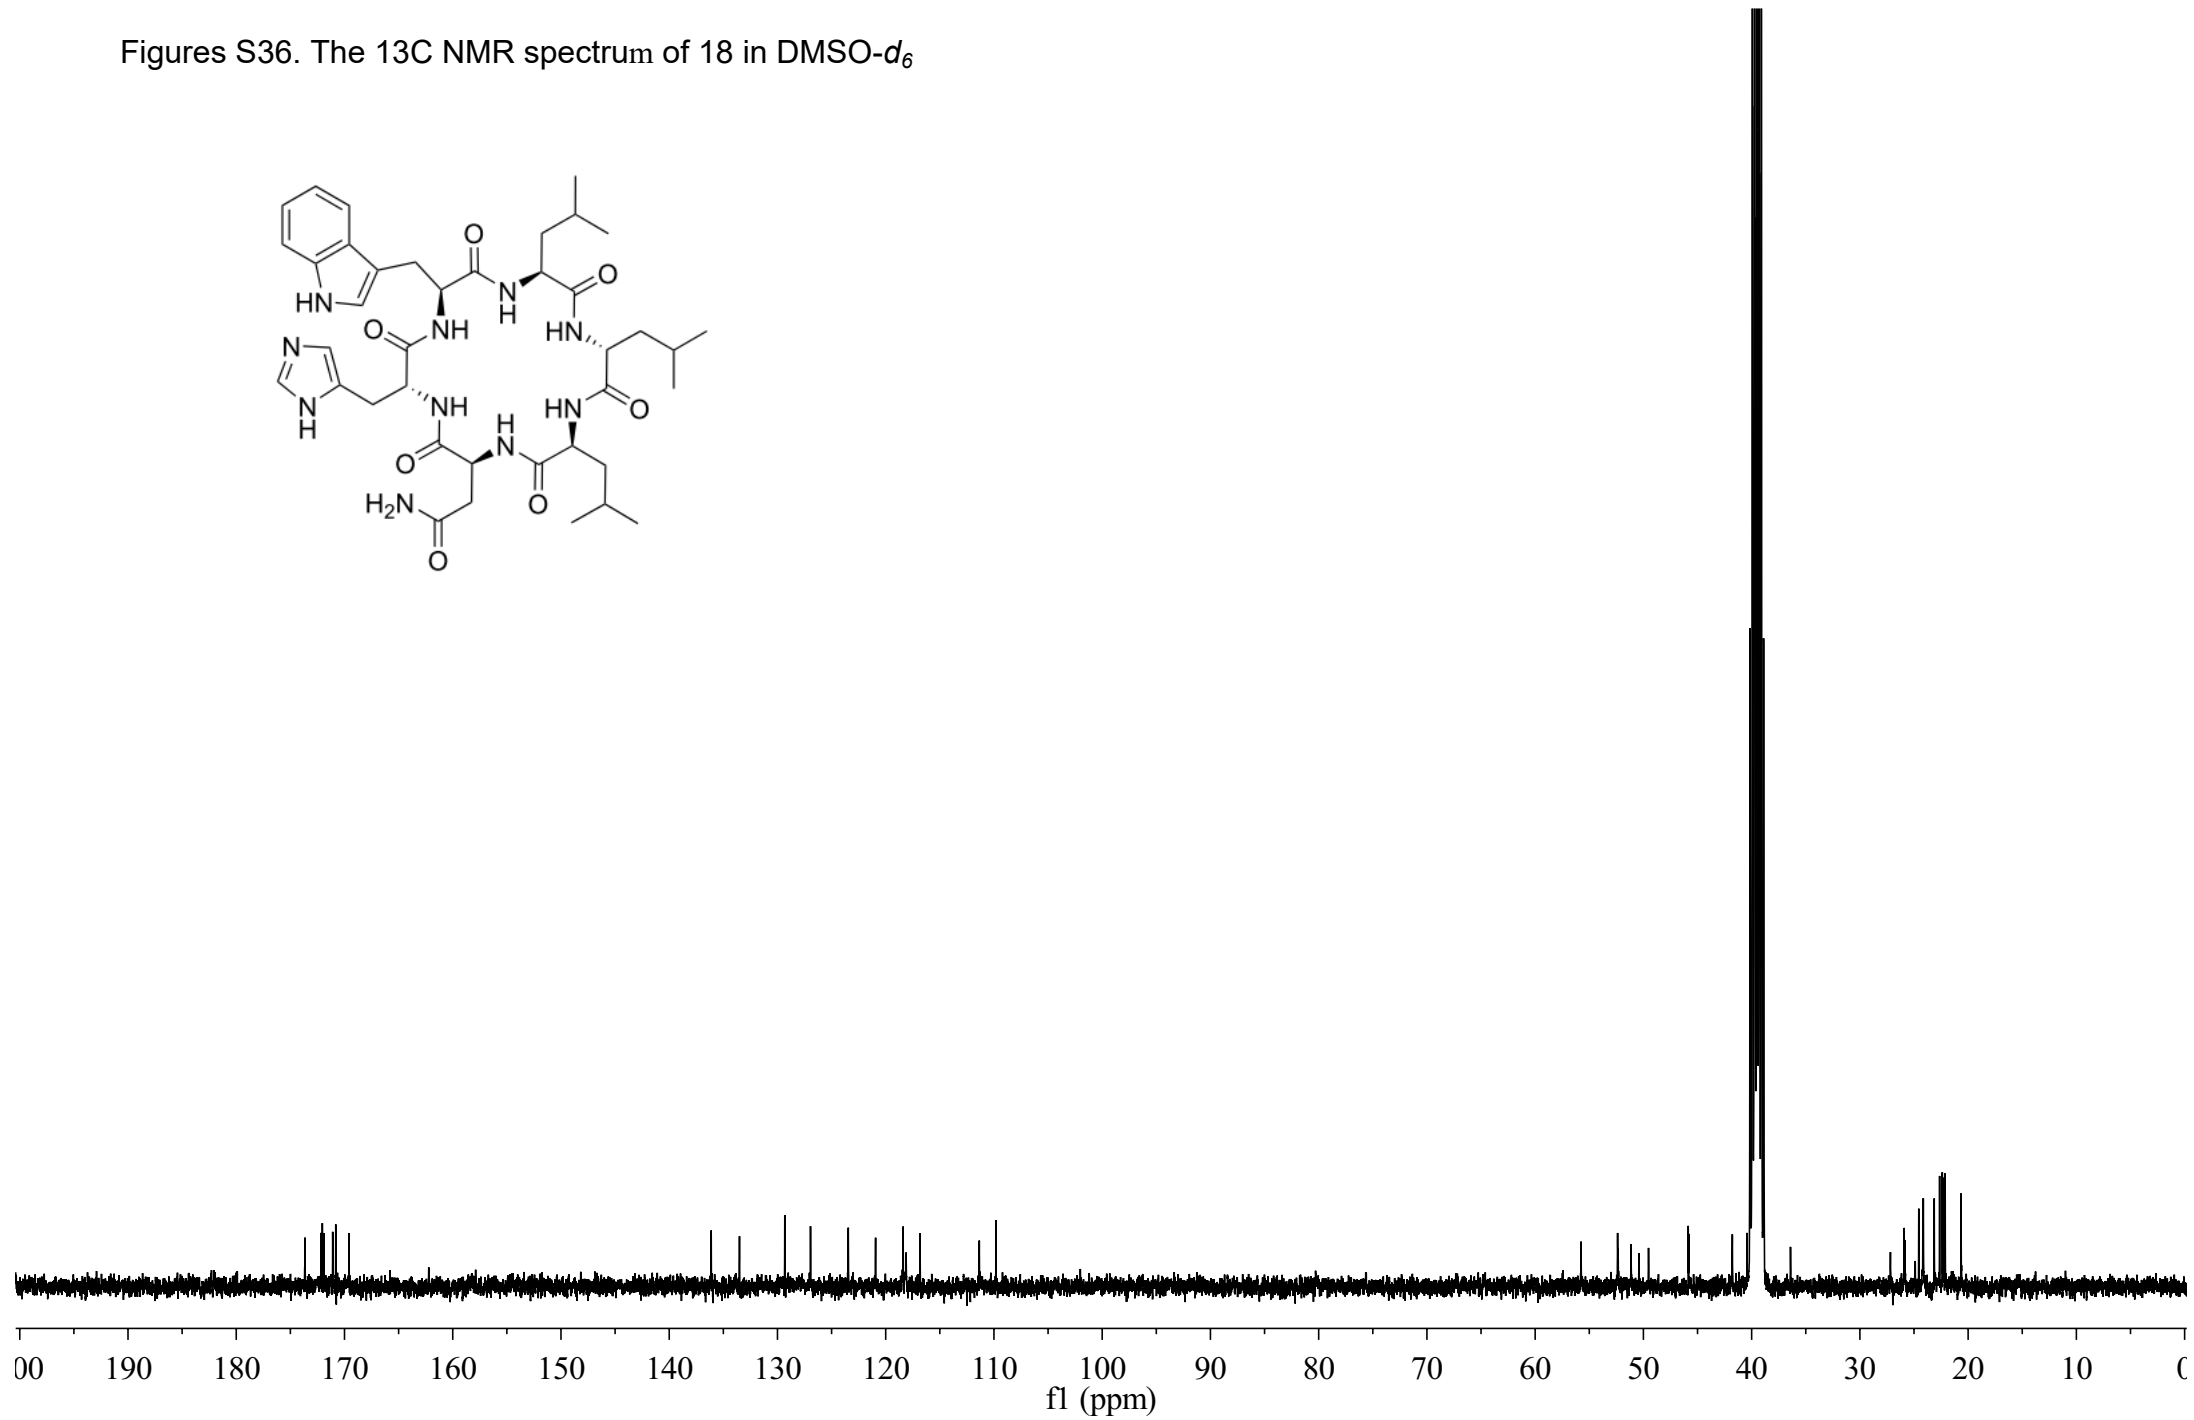

Figures S37. The HRESIMS spectrum of **19**

## Mass Spectrum SmartFormula Report

### Analysis Info

Analysis Name D:\Data\MS\data\202102\liqinglian\_A11\_pos\_45\_01\_10002.d  
 Method LC\_Direct Infusion\_pos\_100-1000mz.m  
 Sample Name liqinglian\_A11\_pos  
 Comment

Acquisition Date 2/8/2021 3:13:53 PM  
 Operator SCSIO  
 Instrument maXis 255552.00029

### Acquisition Parameter

|             |          |                      |          |                  |           |
|-------------|----------|----------------------|----------|------------------|-----------|
| Source Type | ESI      | Ion Polarity         | Positive | Set Nebulizer    | 0.4 Bar   |
| Focus       | Active   | Set Capillary        | 4500 V   | Set Dry Heater   | 180 °C    |
| Scan Begin  | 100 m/z  | Set End Plate Offset | -500 V   | Set Dry Gas      | 4.0 l/min |
| Scan End    | 2000 m/z | Set Charging Voltage | 0 V      | Set Divert Valve | Waste     |
|             |          | Set Corona           | 0 nA     | Set APCI Heater  | 0 °C      |

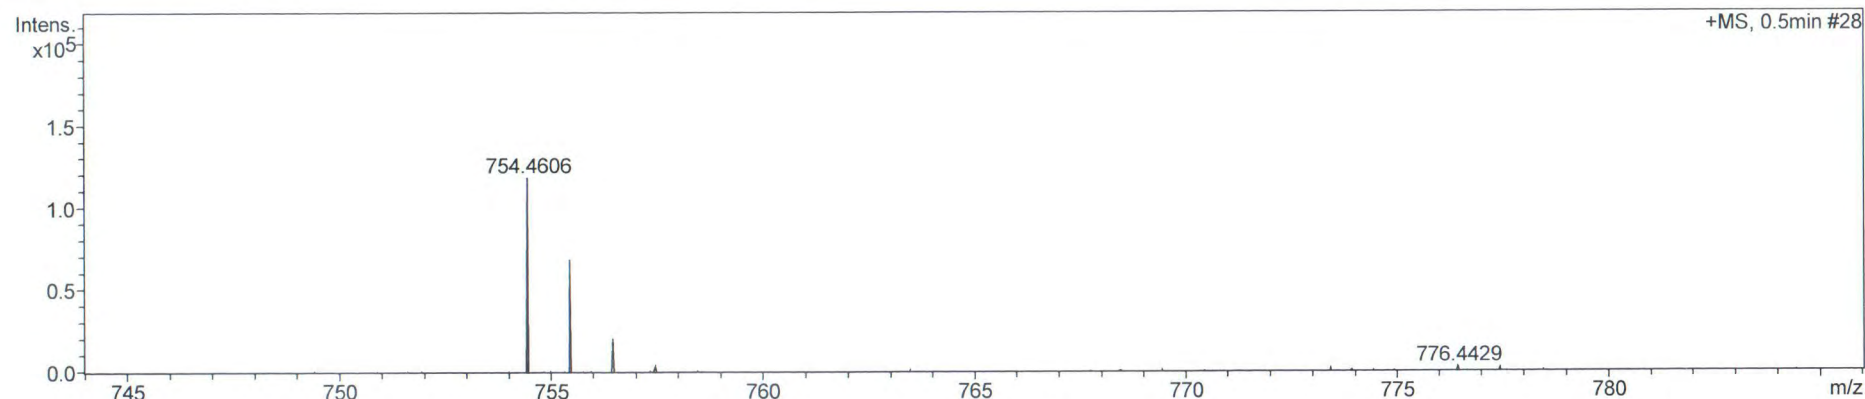

| Meas. m/z | # | Ion Formula  | Score  | m/z      | err [ppm] | err [mDa] | mSigma | rdb  | e <sup>-</sup> Conf | N-Rule |
|-----------|---|--------------|--------|----------|-----------|-----------|--------|------|---------------------|--------|
| 754.4606  | 1 | C38H60N9O7   | 100.00 | 754.4610 | -0.6      | -0.4      | 69.8   | 13.5 | even                | ok     |
| 776.4429  | 1 | C38H59N9NaO7 | 100.00 | 776.4430 | 0.0       | 0.0       | 156.2  | 13.5 | even                | ok     |

Chemical structure of the compound is shown above the spectrum. The spectrum displays peaks corresponding to the structure, with a major peak around 1.0 ppm and several smaller peaks in the aromatic and aliphatic regions.

Figures S39. The  $^{13}\text{C}$  NMR spectrum of 19 in  $\text{DMSO-}d_6$

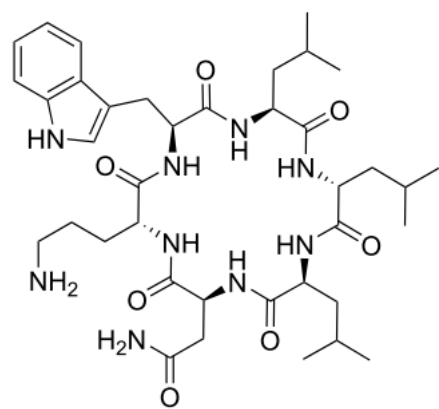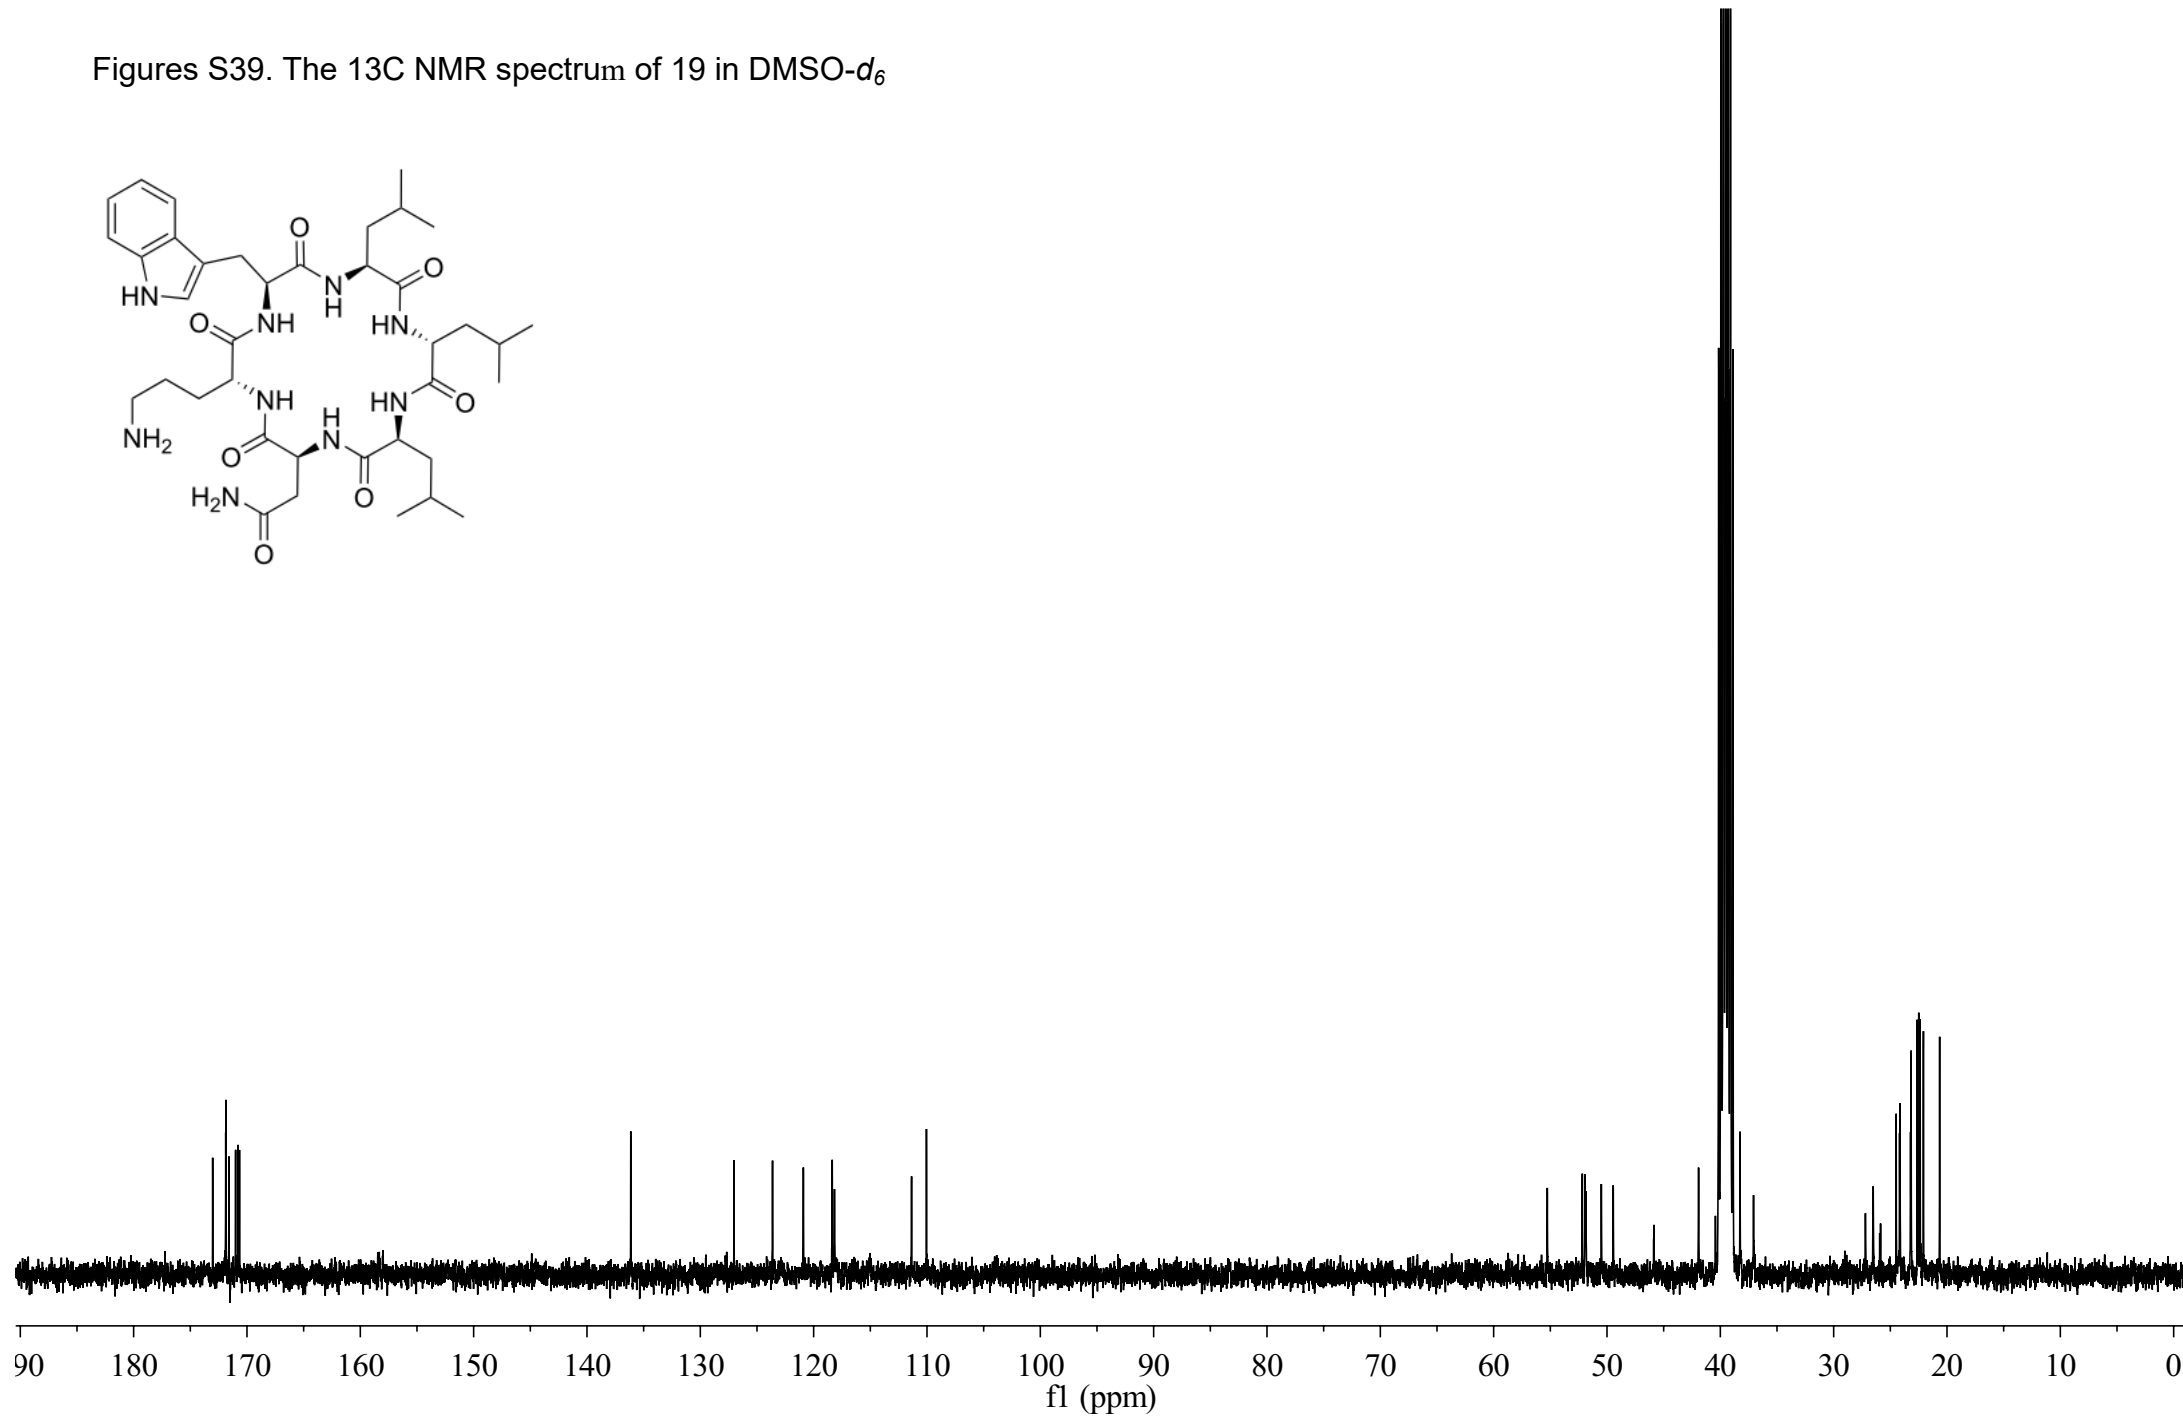

Supplement: s1 [file s1]
